# Supplementary material for: β-Enaminonitrile in the synthesis of tetrahydrobenzo[b]thiophene candidates with DFT simulation, in vitro antiproliferative assessment, molecular docking, and modeling pharmacokinetics
Source: Royal Society of Chemistry journal article supplement (doi:10.1039/d4ra03363a), 2024-01-01

***β*-Enaminonitrile in the Synthesis of Tetrahydrobenzo[*b*]thiophene Candidates with DFT Simulation, *In vitro*  
Antiproliferative Assessment, Molecular docking, and Modeling Pharmacokinetics**

**Amna S. Elgubbi <sup>1</sup>, Eman A. E. El-Helw <sup>2</sup>, Motaleb S. Abousiksaka <sup>1</sup>, Abdullah Y. A. Alzahrani <sup>3</sup>, Sayed K. Ramadan <sup>2,\*</sup>**

<sup>1</sup> Chemistry Department, Faculty of Science, Misurata University, 2478, Misurata, Libya

<sup>2</sup> Chemistry Department, Faculty of Science, Ain Shams University, Cairo, 11566, Egypt

<sup>3</sup> Chemistry Department, Faculty of Science and Arts, King Khalid University, Mohail Assir, Abha, Saudi Arabia

\**E*-mail: [sayed.karam2008@sci.asu.edu.eg](mailto:sayed.karam2008@sci.asu.edu.eg)

**Supporting information:**

DFT study

**Table S1.** Energy level distribution of frontier orbitals and global reactivity indices of substances **2-12**.

| Compds.     | * <i>E</i> | <i>E</i> <sub>HOMO</sub><br>(eV) | <i>E</i> <sub>LUMO</sub><br>(eV) | $\Delta E$<br>(eV) | $\mu$<br>(Debye) | $\eta$<br>(eV) | $\zeta$<br>(eV <sup>-1</sup> ) | $\mu_o$<br>(eV) | $\omega$<br>(eV) | <i>n</i><br>(eV <sup>-1</sup> ) | <i>I</i> <sub>p</sub><br>(eV) | <i>EA</i><br>(eV) | <i>x</i><br>(eV) |
|-------------|------------|----------------------------------|----------------------------------|--------------------|------------------|----------------|--------------------------------|-----------------|------------------|---------------------------------|-------------------------------|-------------------|------------------|
| <b>2</b>    | 11.256     | -6.994                           | 0.367                            | 7.361              | -1.357           | 3.680          | 0.272                          | -3.313          | 1.491            | 0.671                           | 6.994                         | -0.367            | 3.313            |
| <b>3</b>    | 9.888      | -8.164                           | 0.366                            | 8.530              | -9.302           | 4.265          | 0.234                          | -3.899          | 1.782            | 0.561                           | 8.164                         | -0.366            | 3.899            |
| <b>4</b>    | 13.319     | -7.055                           | 0.365                            | 7.420              | -7.469           | 3.710          | 0.269                          | -3.345          | 1.508            | 0.663                           | 7.055                         | -0.365            | 3.345            |
| <b>5</b>    | 29.559     | -8.065                           | -1.975                           | 6.090              | -3.633           | 0.987          | 1.013                          | 5.020           | 12.766           | 0.078                           | 8.065                         | 1.975             | 5.020            |
| <b>6</b>    | 11.020     | -8.151                           | 0.366                            | 8.517              | -8.823           | 4.258          | 0.235                          | -3.892          | 1.779            | 0.562                           | 8.151                         | -0.366            | 3.892            |
| <b>7</b>    | 14.159     | -7.071                           | 0.365                            | 7.436              | -6.829           | 3.718          | 0.269                          | -3.353          | 1.512            | 0.661                           | 7.071                         | -0.365            | 3.353            |
| <b>8</b>    | 40.965     | -8.120                           | -3.458                           | 8.486              | -14.058          | 4.243          | 0.236                          | -5.789          | 3.949            | 0.253                           | 8.120                         | 3.458             | 5.789            |
| <b>9</b>    | 23.498     | -6.650                           | 0.366                            | 7.016              | 1.185            | 3.508          | 0.285                          | -3.142          | 1.407            | 0.711                           | 6.650                         | -0.366            | 3.142            |
| <b>10</b>   | 18.968     | -7.618                           | 0.366                            | 7.984              | -3.135           | 3.992          | 0.250                          | -3.626          | 1.647            | 0.607                           | 7.618                         | -0.366            | 3.626            |
| <b>11</b>   | 31.245     | -7.152                           | -5.612                           | 1.540              | 3.458            | 0.770          | 1.299                          | -6.382          | 26.448           | 0.038                           | 7.152                         | 5.612             | 6.382            |
| <b>12</b>   | 47.800     | -7.439                           | -5.463                           | 1.976              | -1.165           | 0.988          | 1.012                          | -6.451          | 21.060           | 0.047                           | 7.439                         | 5.463             | 6.451            |
| <b>Dox.</b> | 67.785     | -9.189                           | -7.149                           | 2.040              | 3.954            | 1.020          | 0.98                           | -8.169          | 32.72            | 0.030                           | 9.189                         | 7.149             | 8.169            |

\**E*: Minimized Energy (kcal/mol)      Dox.: Doxorubicin       $\mu$ : Dipole/dipole       $\eta$ : Global Hardness

$\zeta$ : Global Softness       $\mu_o$ : Chemical Potential       $\omega$ : Global Electrophilicity Index

*n*: Nucleophilicity Index      *I*<sub>p</sub>: Ionization Potential      *EA*: Electron Affinity      *x*: Electronegativity

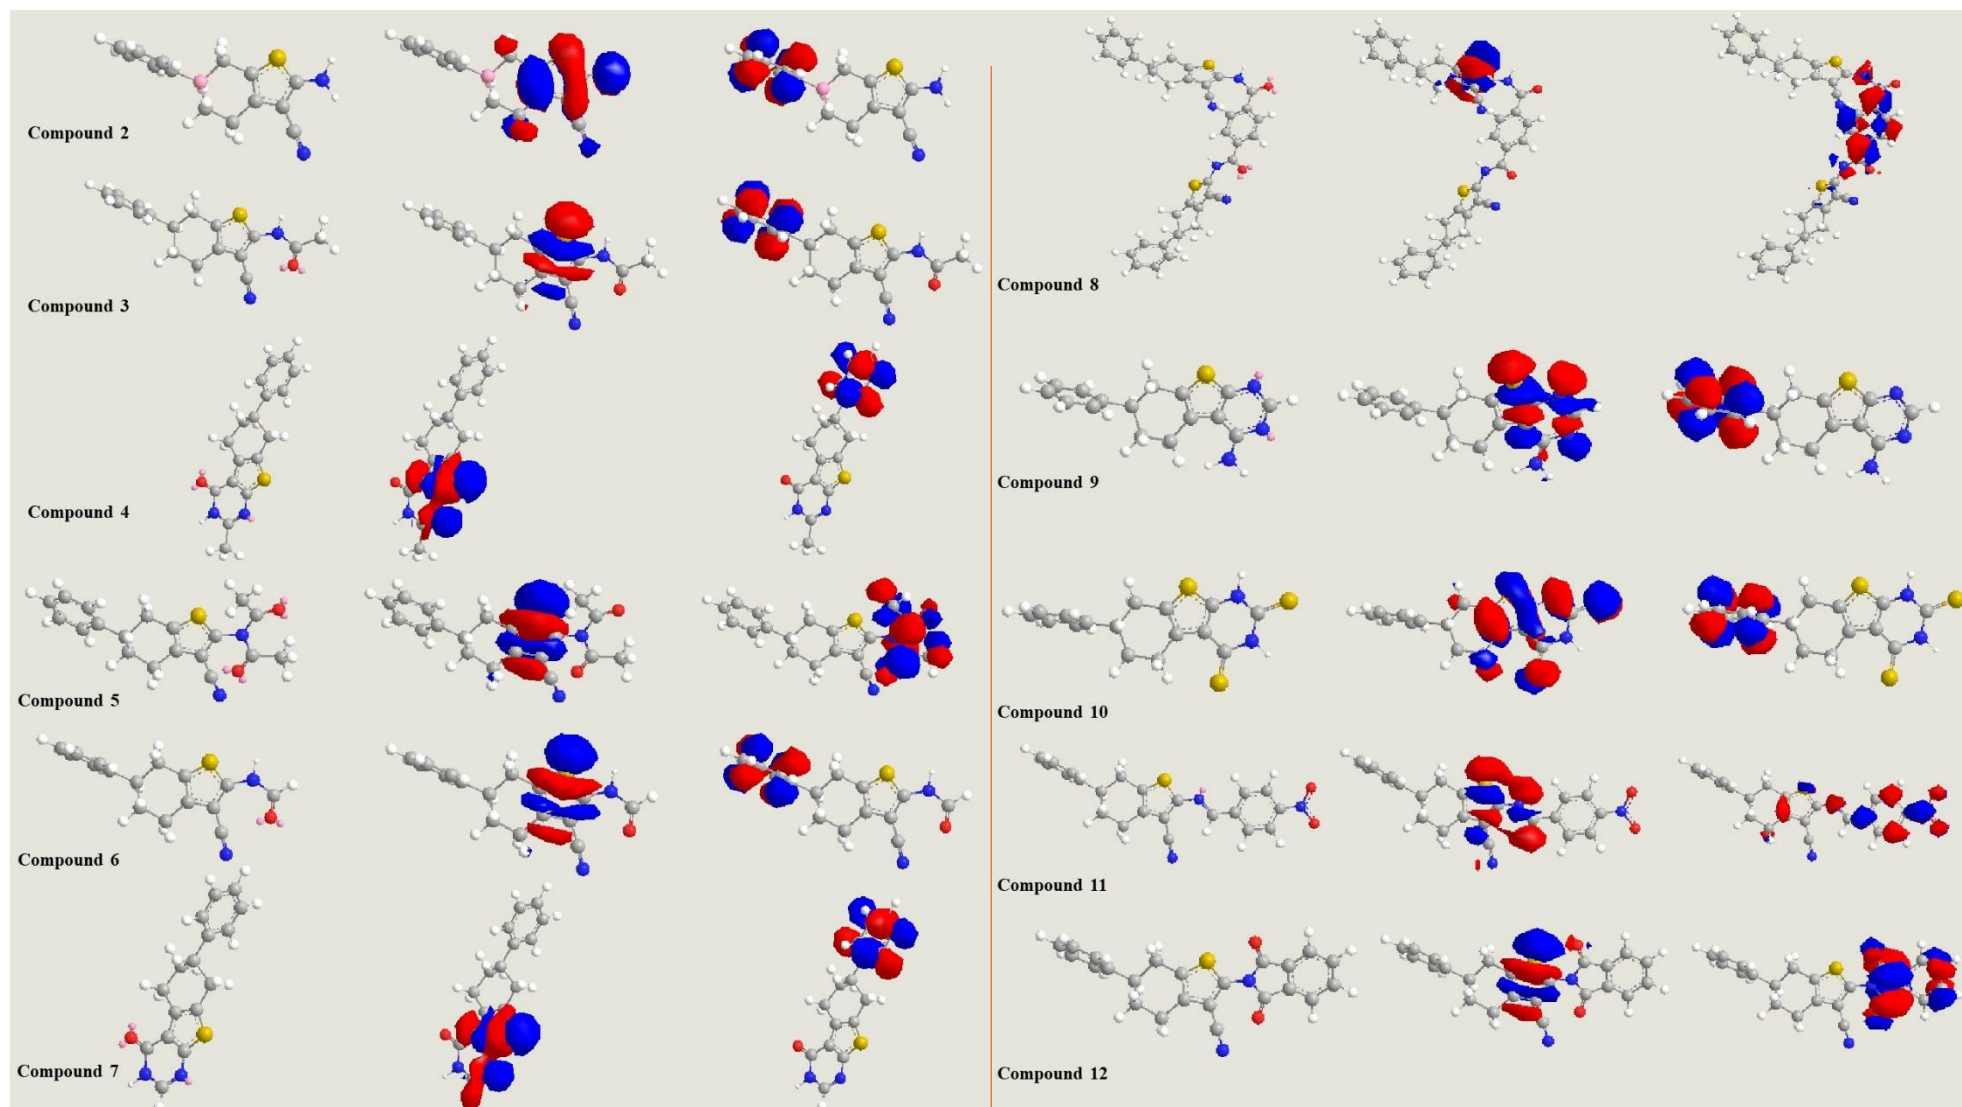

**Fig. S1.** Optimized configurations (left), HOMO (middle), and LUMO (right) of substances 2-12.

Atom color index: grey C, white H, blue N, red O, yellow S, and green Cl.

**Table S2.** Physicochemical Properties / Lipophilicity / Drug-likeness properties of compounds **2-12**.

| Entry                          | Compounds |        |        |        |        |        |        |        |        |        |        |
|--------------------------------|-----------|--------|--------|--------|--------|--------|--------|--------|--------|--------|--------|
|                                | 2         | 3      | 4      | 5      | 6      | 7      | 8      | 9      | 10     | 11     | 12     |
| Molecular weight (g/mol)       | 254.35    | 296.39 | 296.39 | 338.42 | 282.36 | 282.36 | 638.80 | 281.38 | 330.49 | 387.45 | 384.45 |
| Num. heavy atoms               | 18        | 21     | 21     | 24     | 20     | 20     | 46     | 20     | 21     | 28     | 28     |
| Num. arom. heavy               | 11        | 11     | 15     | 11     | 11     | 15     | 28     | 15     | 15     | 17     | 17     |
| Fraction Csp3                  | 0.27      | 0.29   | 0.29   | 0.32   | 0.25   | 0.25   | 0.21   | 0.25   | 0.25   | 0.18   | 0.17   |
| Num. rotatable bonds           | 1         | 3      | 1      | 4      | 3      | 1      | 8      | 1      | 1      | 4      | 2      |
| Num. H-bond acceptor           | 1         | 2      | 2      | 3      | 2      | 2      | 4      | 2      | 0      | 4      | 3      |
| Num. H-bond donors             | 1         | 1      | 1      | 0      | 1      | 1      | 2      | 1      | 2      | 0      | 0      |
| Molar Refractivity             | 75.36     | 85.27  | 87.13  | 95.17  | 80.85  | 82.16  | 183.89 | 83.74  | 94.11  | 113.47 | 111.47 |
| TPSA (Å <sup>2</sup> )         | 78.05     | 81.13  | 73.99  | 89.41  | 81.13  | 73.99  | 162.26 | 80.04  | 124.00 | 110.21 | 89.41  |
| Consensus Log P <sub>o/w</sub> | 3.41      | 3.48   | 3.71   | 3.45   | 3.38   | 3.42   | 7.33   | 3.47   | 4.74   | 4.39   | 4.37   |
| Lipinski's Rule                | Yes       | Yes    | Yes    | Yes    | Yes    | Yes    | No     | Yes    | Yes    | Yes    | Yes    |
| Bioavailability Score          | 0.55      | 0.55   | 0.55   | 0.55   | 0.55   | 0.55   | 0.17   | 0.55   | 0.55   | 0.55   | 0.55   |
| <b>Pharmacokinetics</b>        |           |        |        |        |        |        |        |        |        |        |        |
| GI absorption                  | High      | High   | High   | High   | High   | High   | Low    | High   | Low    | Low    | High   |
| BBB permeant                   | Yes       | No     | Yes    | No     | No     | Yes    | No     | No     | No     | No     | No     |
| P-gp substrate                 | Yes       | No     | Yes    | No     | No     | Yes    | No     | Yes    | Yes    | No     | No     |
| CYP1A2 inhibitor               | Yes       | Yes    | Yes    | No     | Yes    |

|                                                |       |       |       |       |       |       |       |       |       |       |       |
|------------------------------------------------|-------|-------|-------|-------|-------|-------|-------|-------|-------|-------|-------|
| CYP2C19 inhibitor                              | Yes   | Yes   | Yes   | Yes   | Yes   | Yes   | No    | Yes   | Yes   | Yes   | Yes   |
| CYP2C9 inhibitor                               | Yes   | Yes   | Yes   | Yes   | Yes   | Yes   | No    | Yes   | Yes   | Yes   | Yes   |
| CYP2D6 inhibitor                               | No    |
| CYP3A4 inhibitor                               | No    | Yes   | No    | Yes   | No    | No    | No    | Yes   | Yes   | Yes   | Yes   |
| Log K <sub>p</sub> (Skin permeation)<br>(cm/s) | -4.91 | -5.27 | -5.74 | -5.94 | -5.17 | -5.65 | -3.52 | -5.30 | -5.28 | -4.83 | -5.23 |

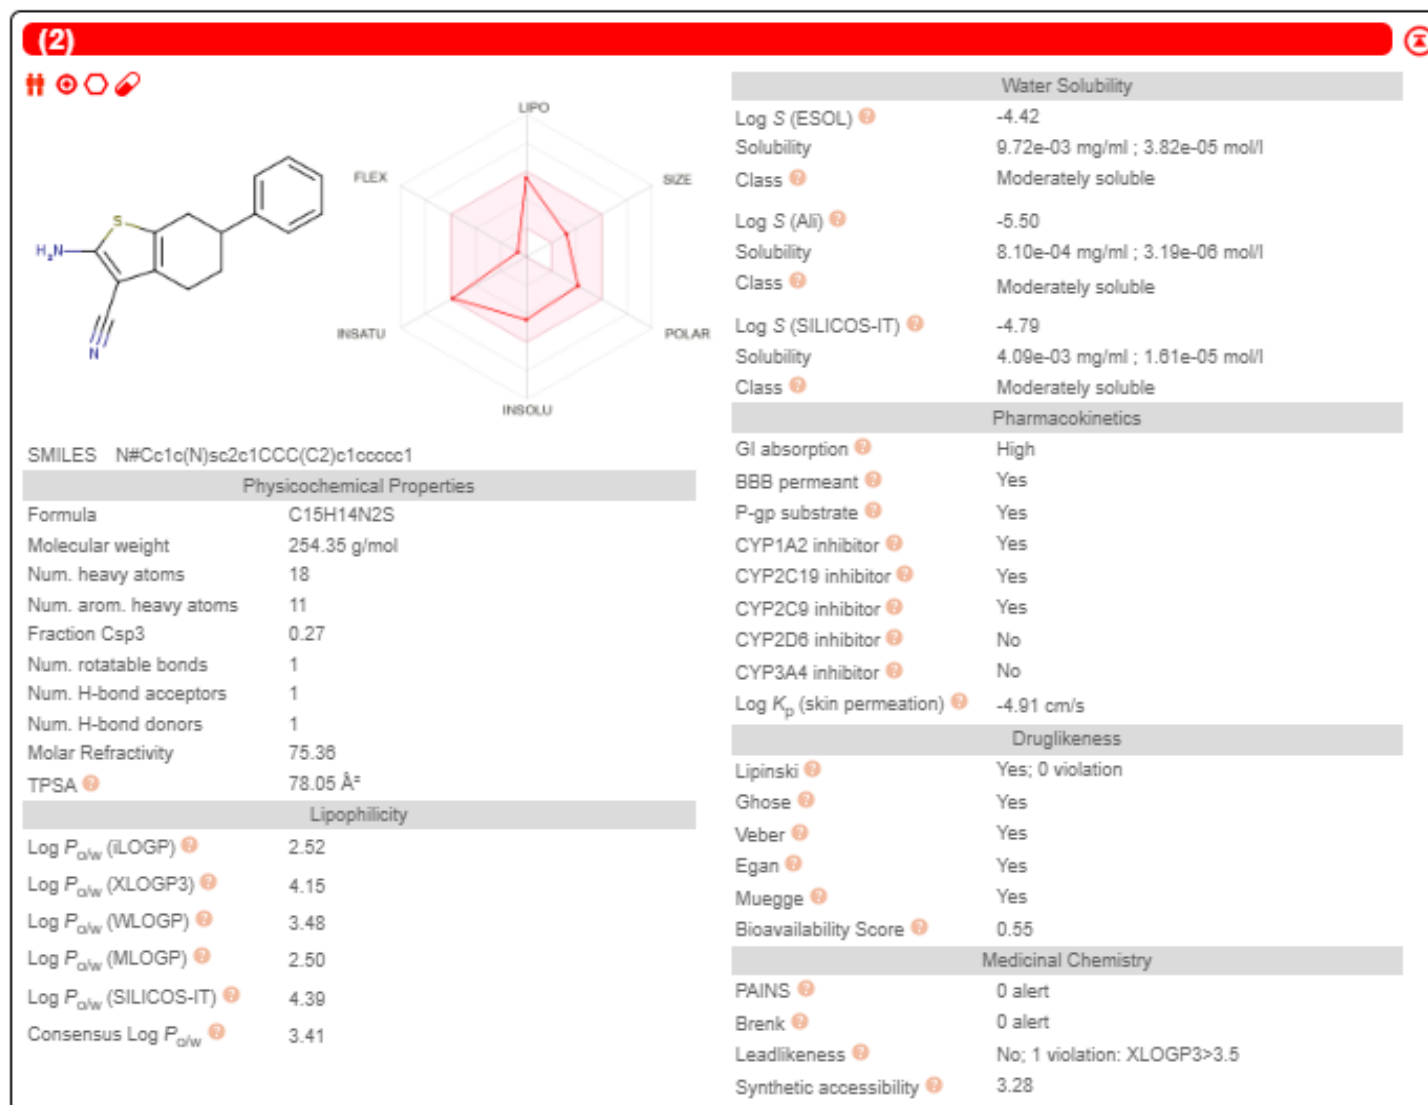

Fig. S2. ADME of compound 2.

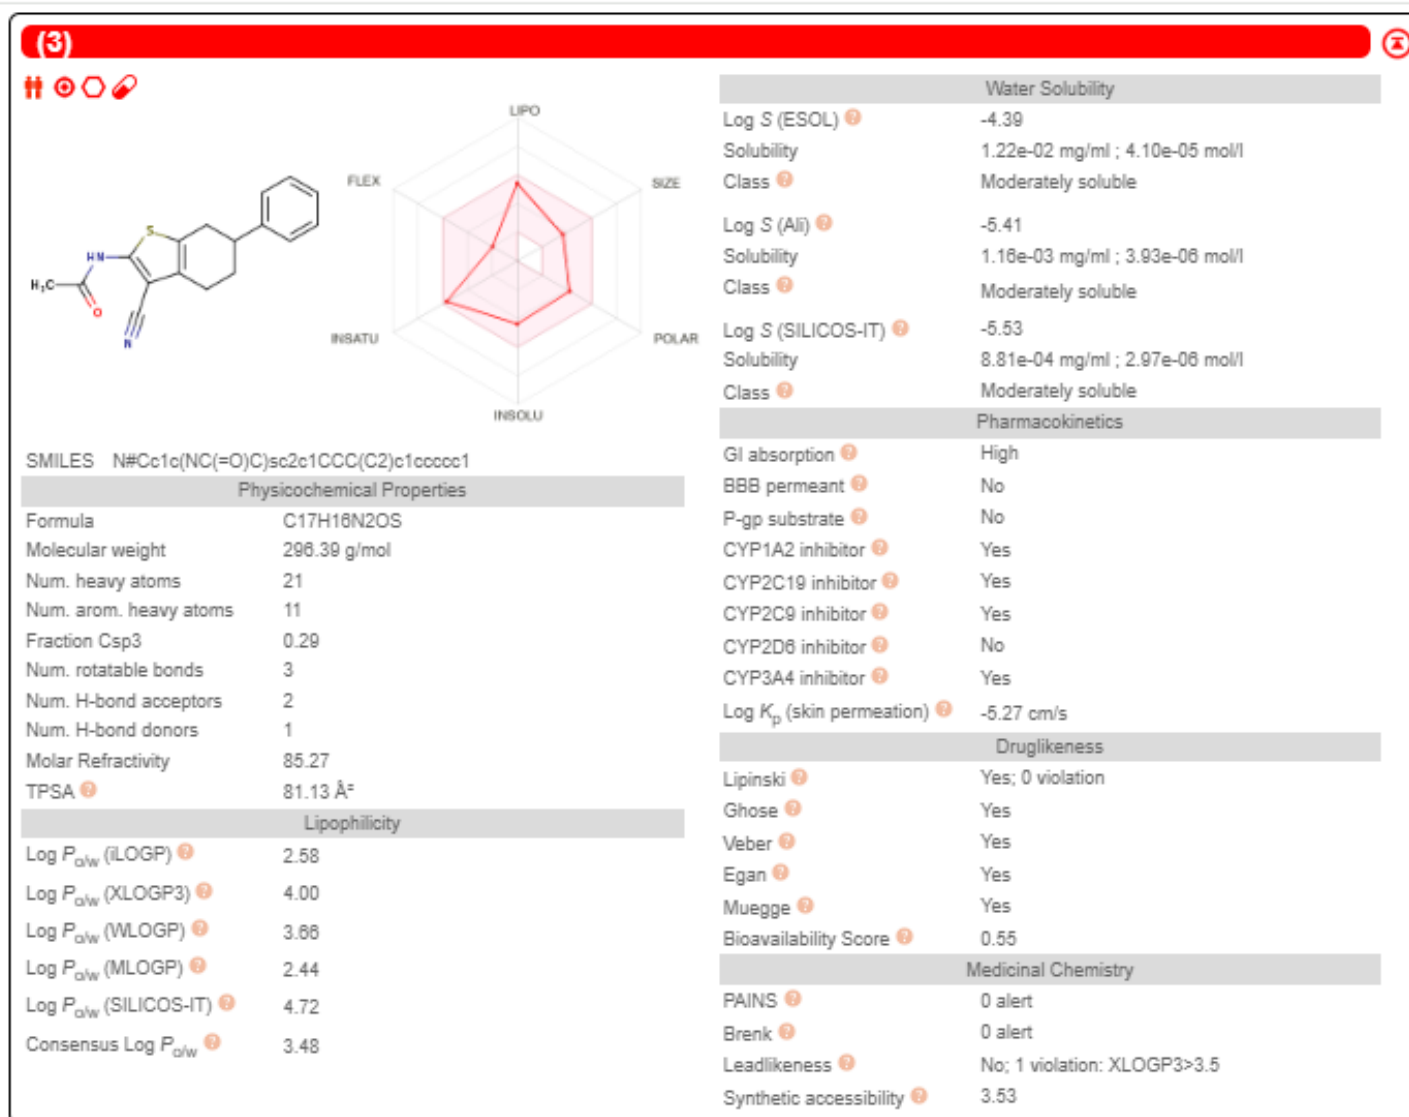

Fig. S3. ADME of compound 3.

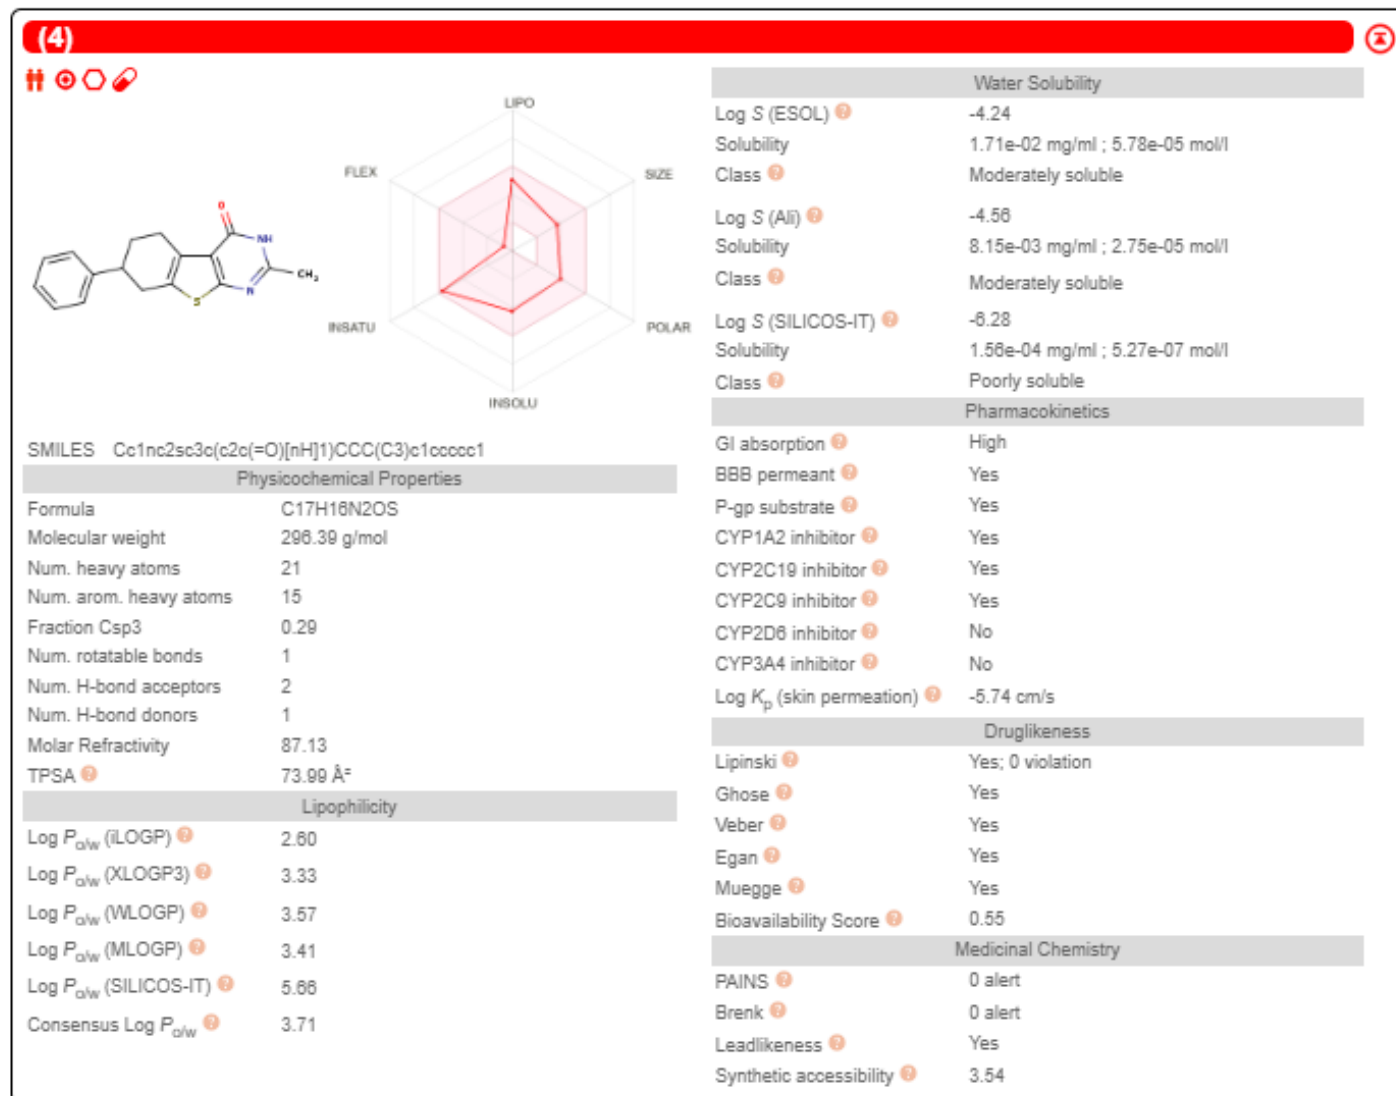

Fig. S4. ADME of compound 4.



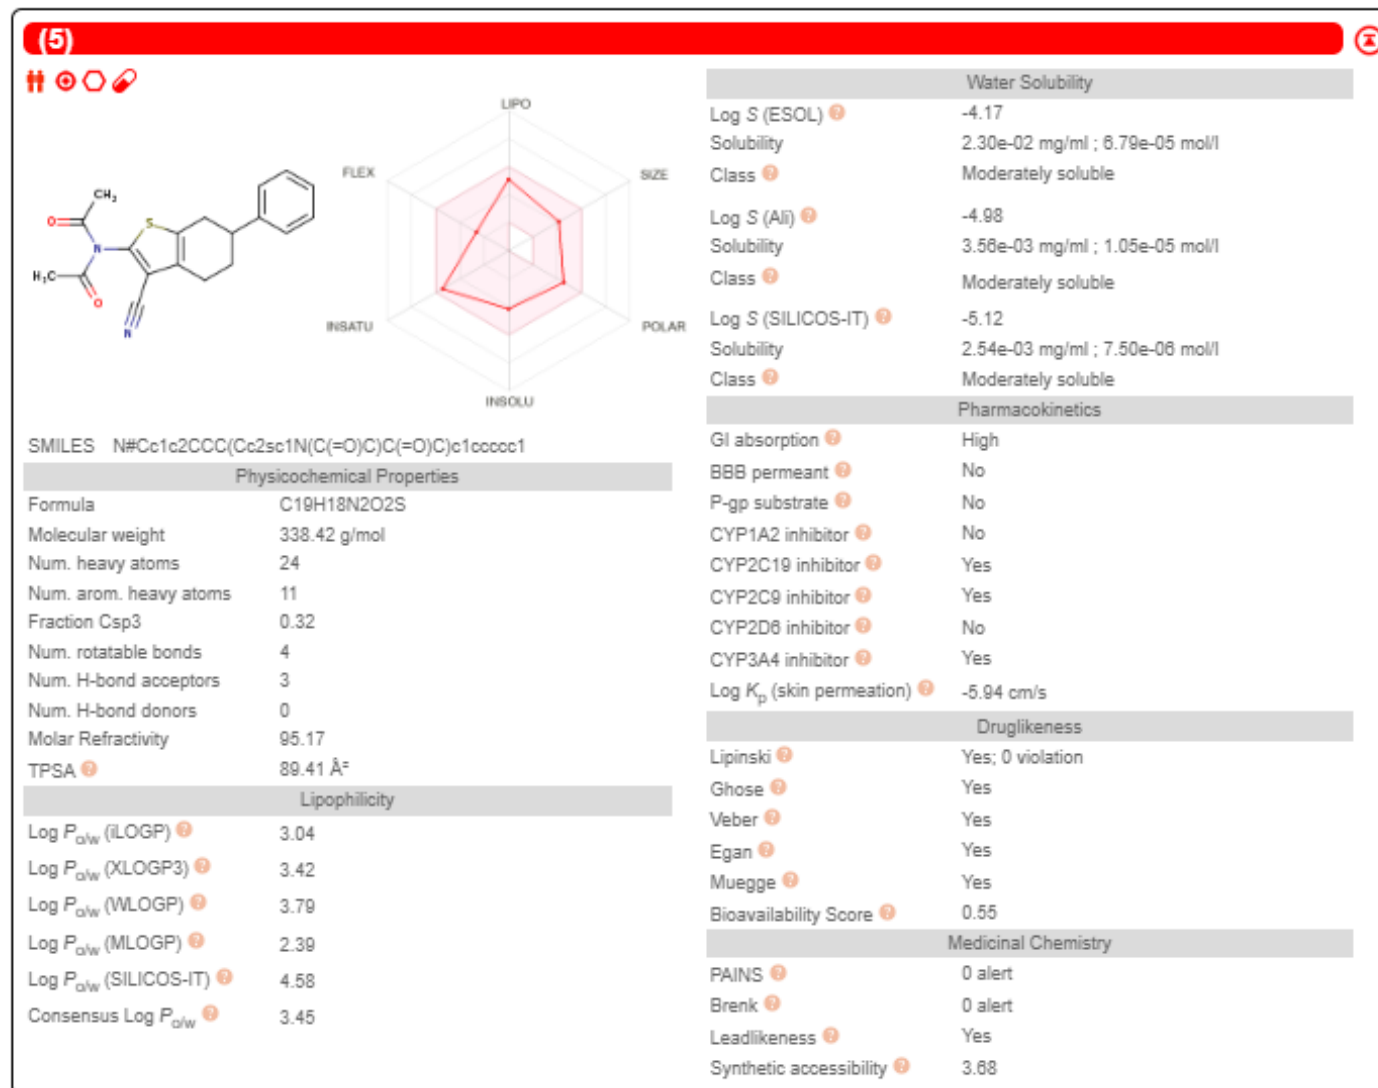

Fig. S5. ADME of compound 5.

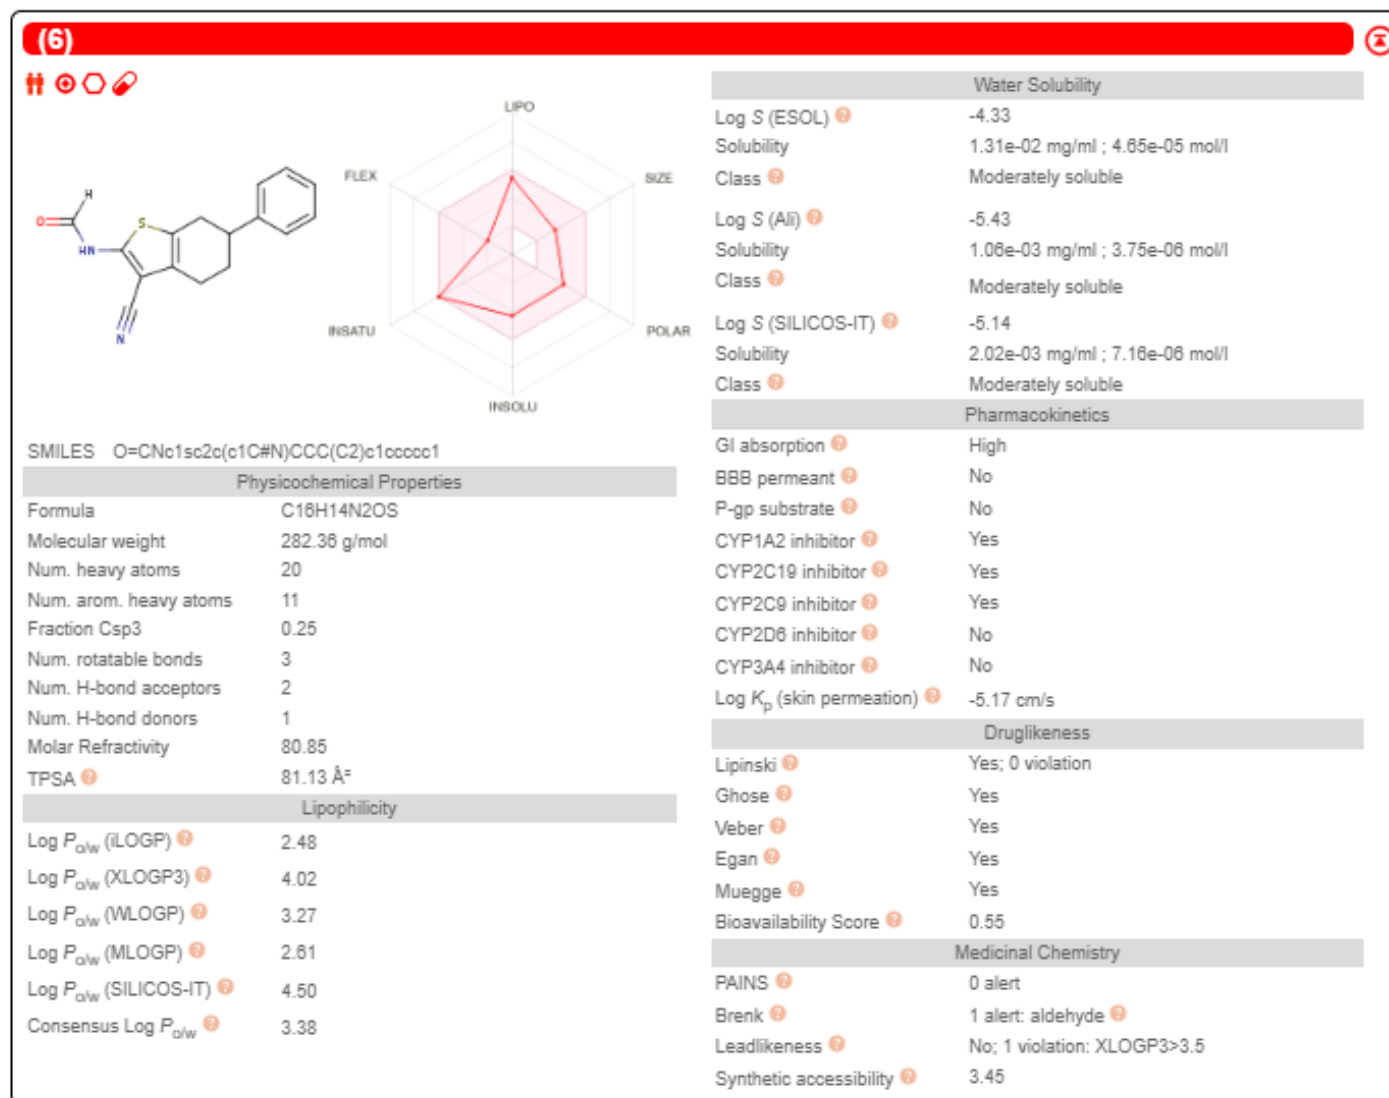

Fig. S6. ADME of compound 6.

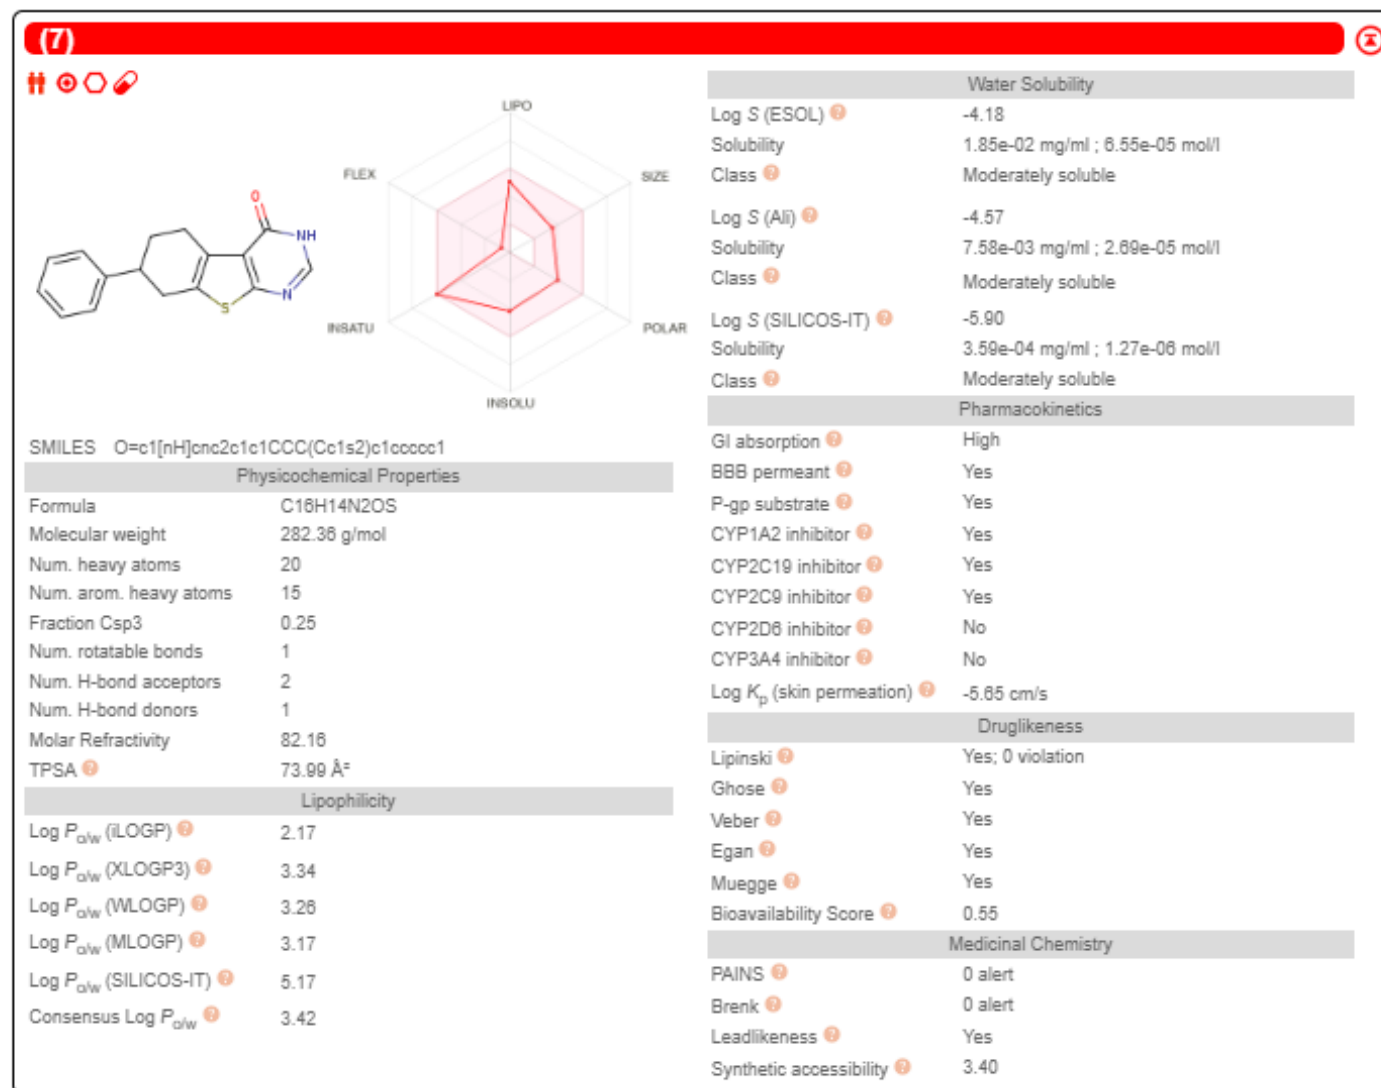

Fig. S7. ADME of compound 7.

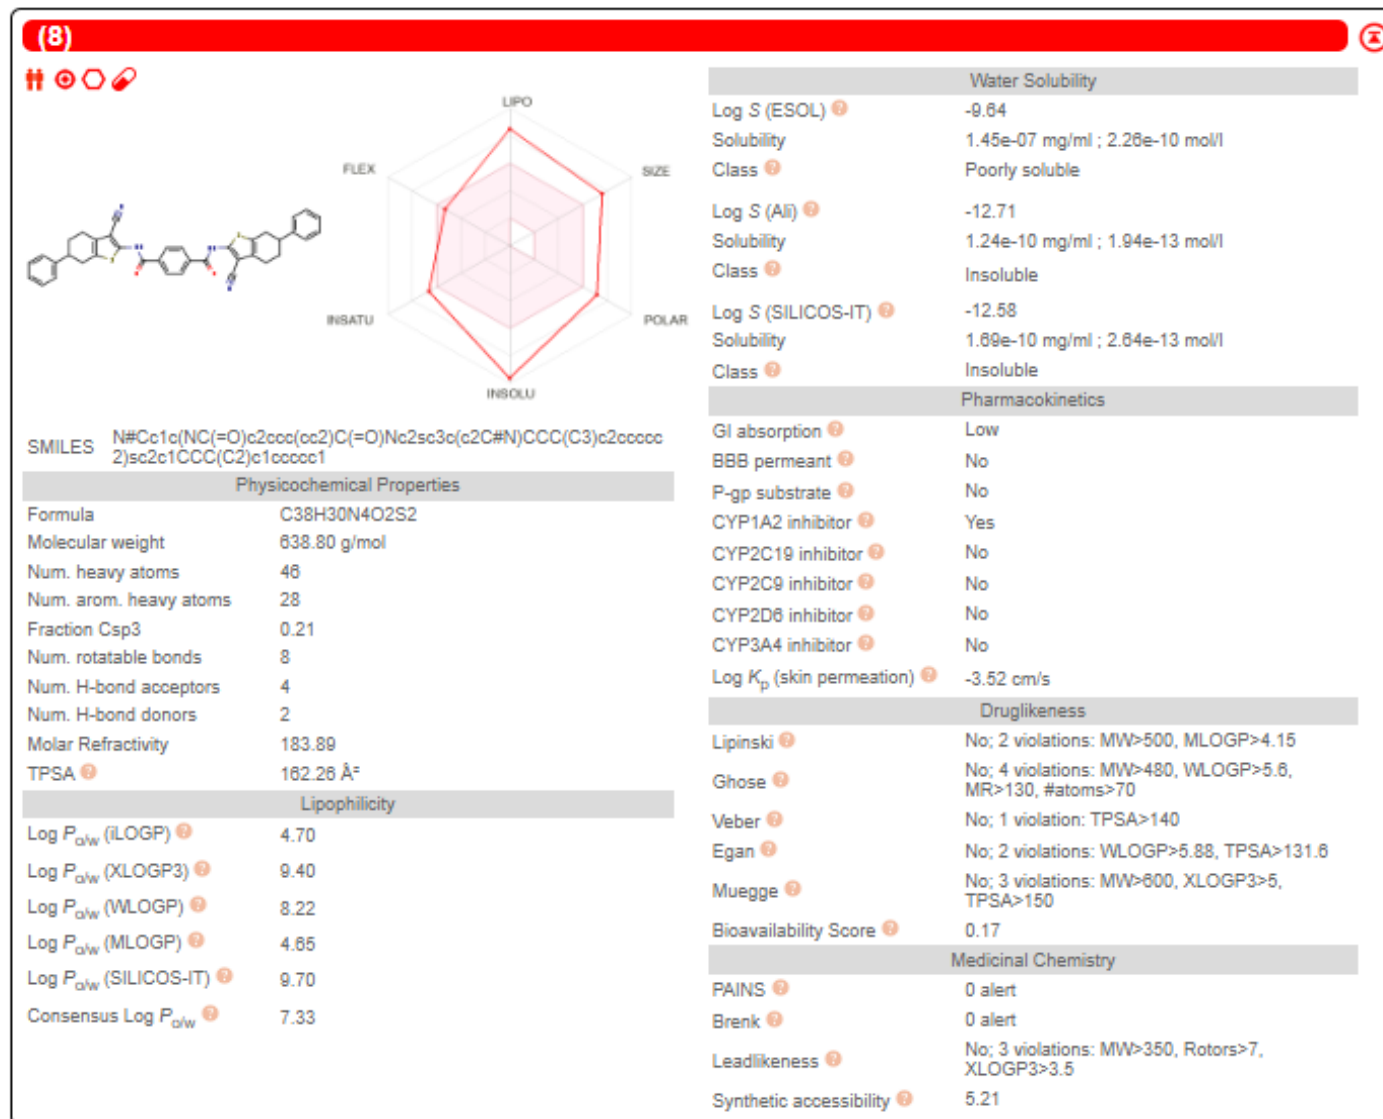

Fig. S8. ADME of compound 8.

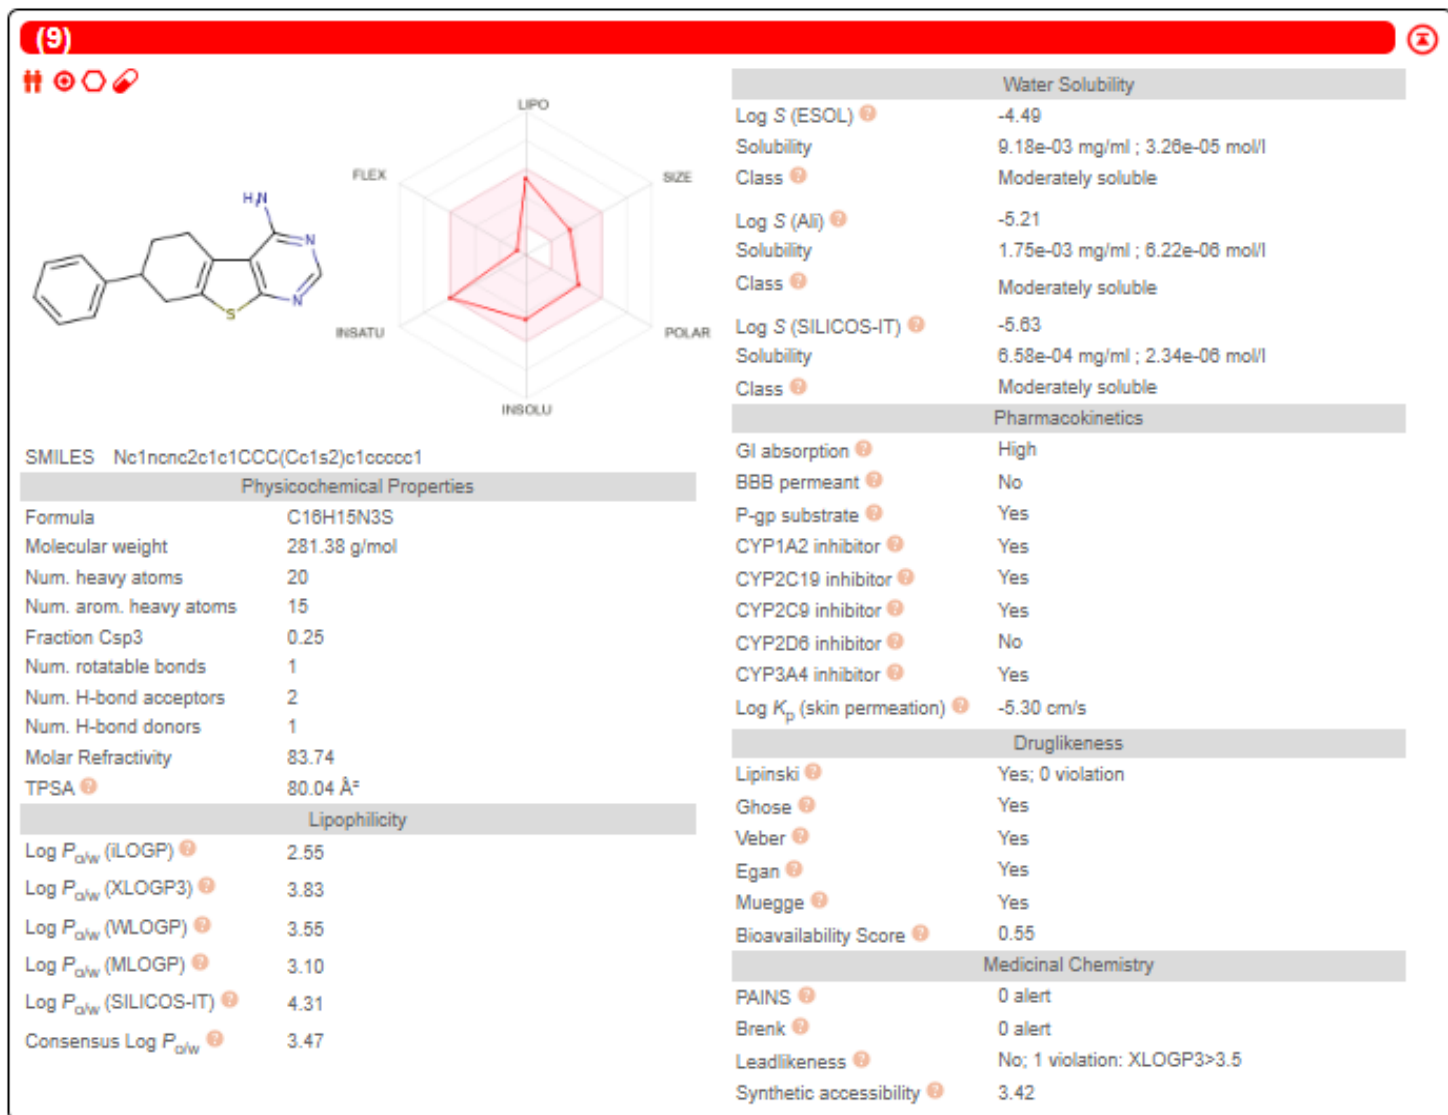

Fig. S9. ADME of compound 9.

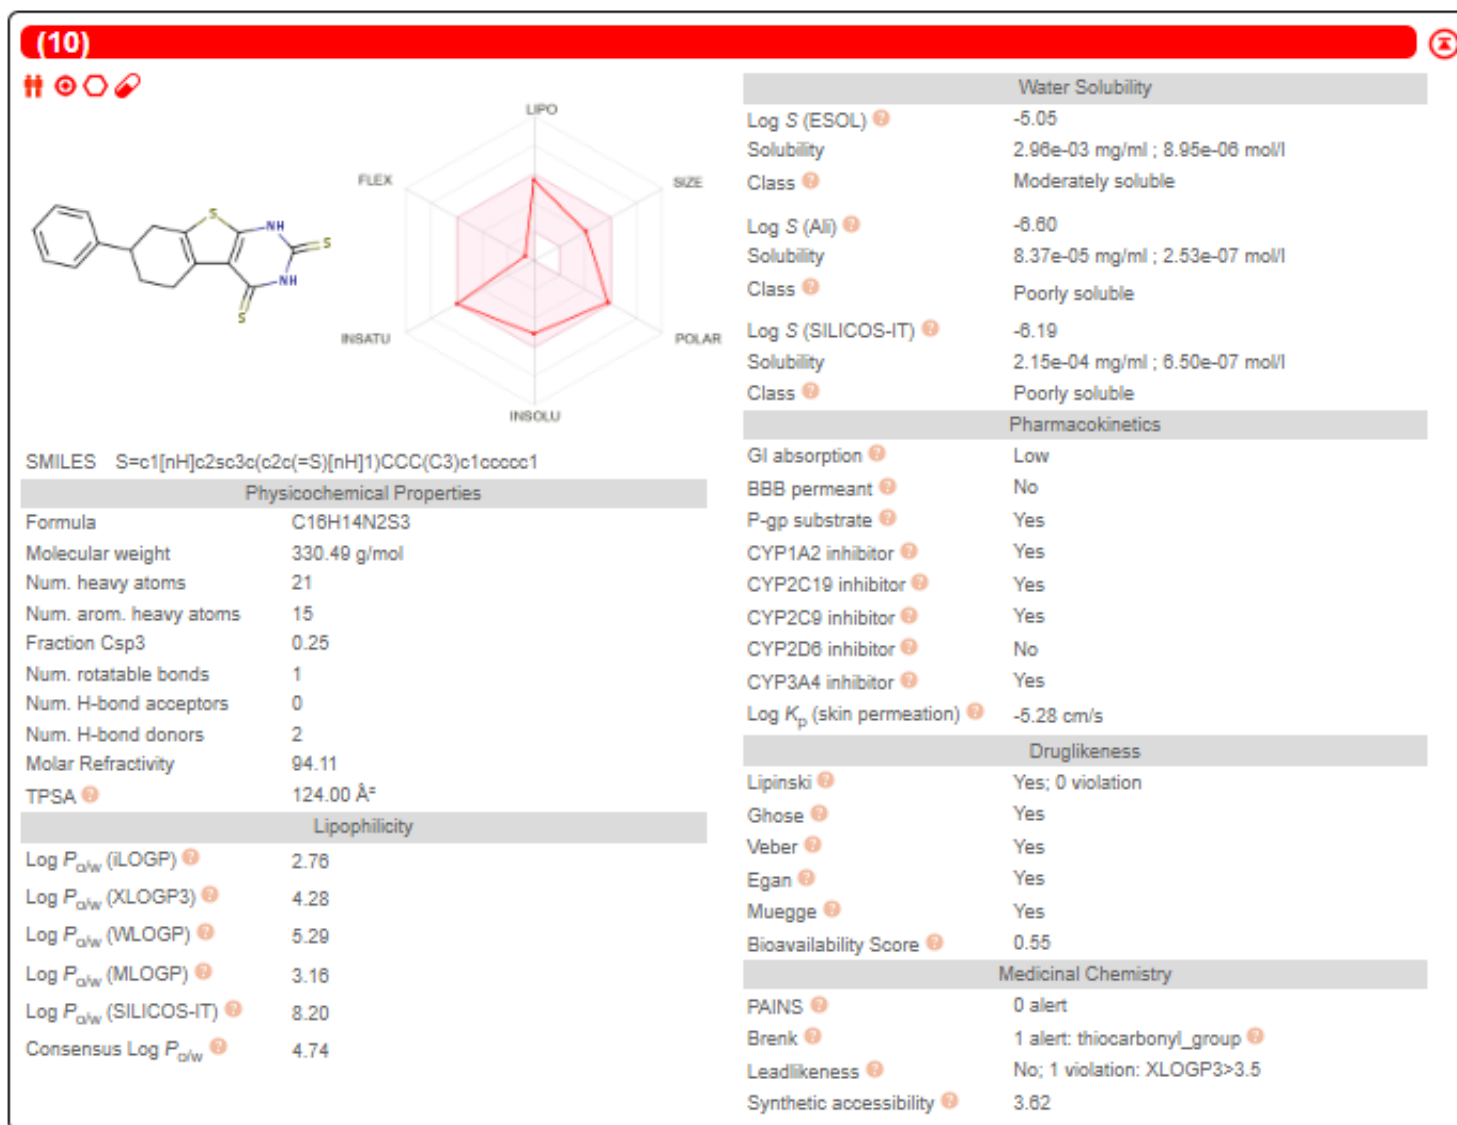

Fig. S10. ADME of compound 10.

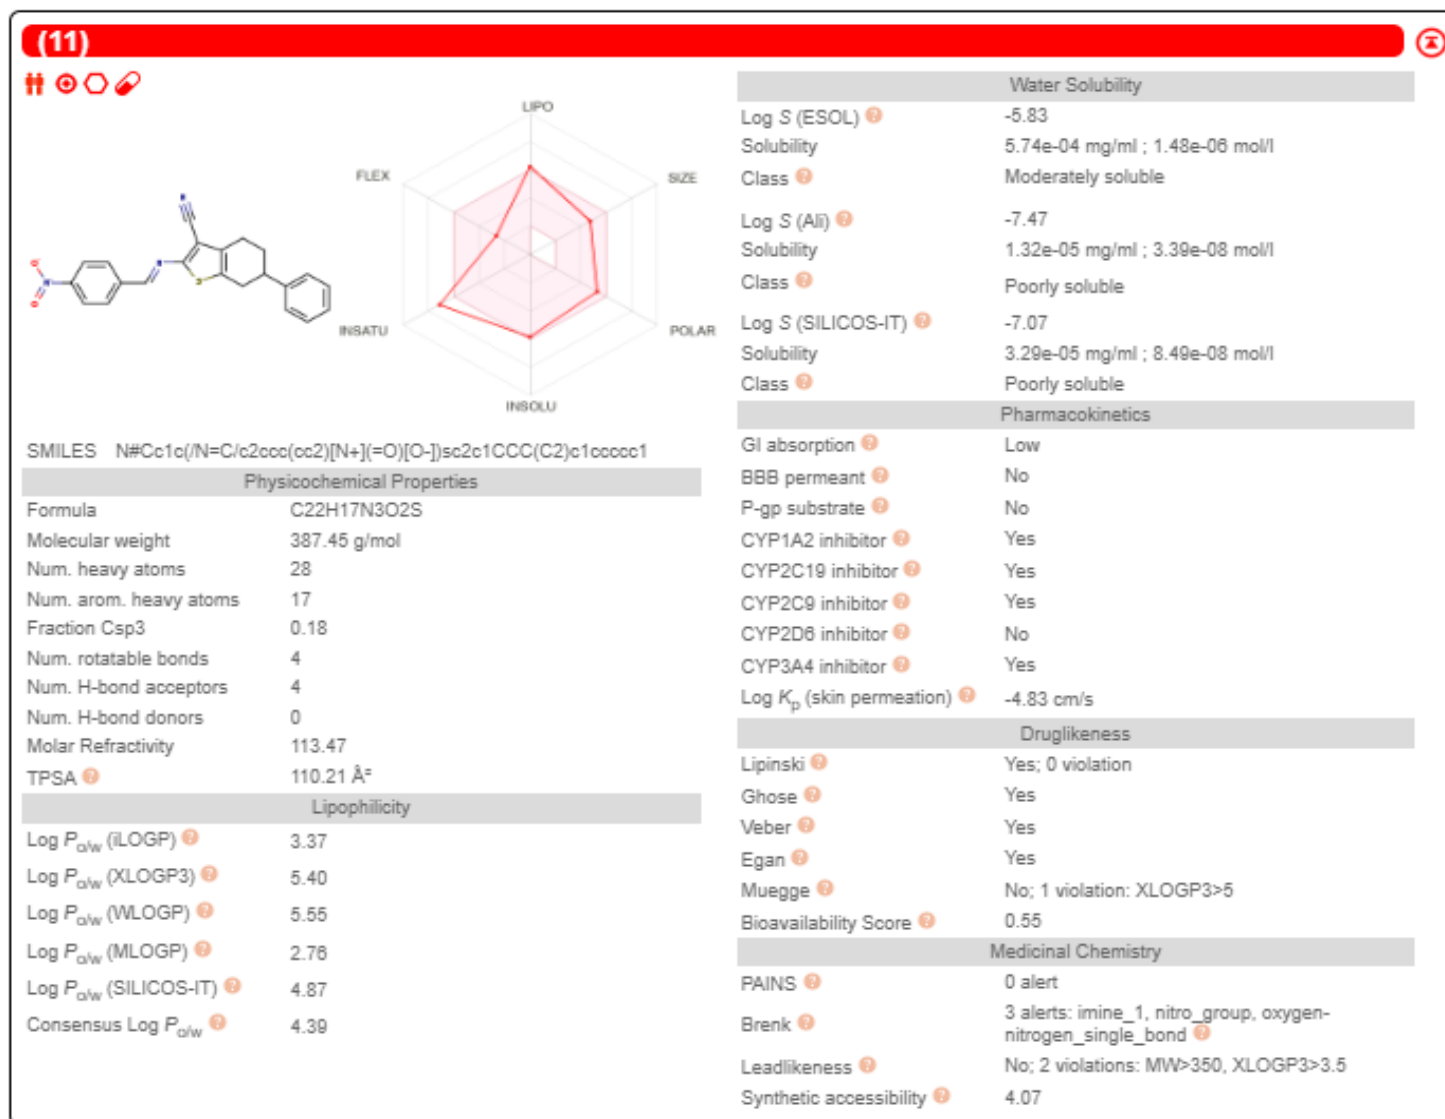

Fig. S11. ADME of compound 11.

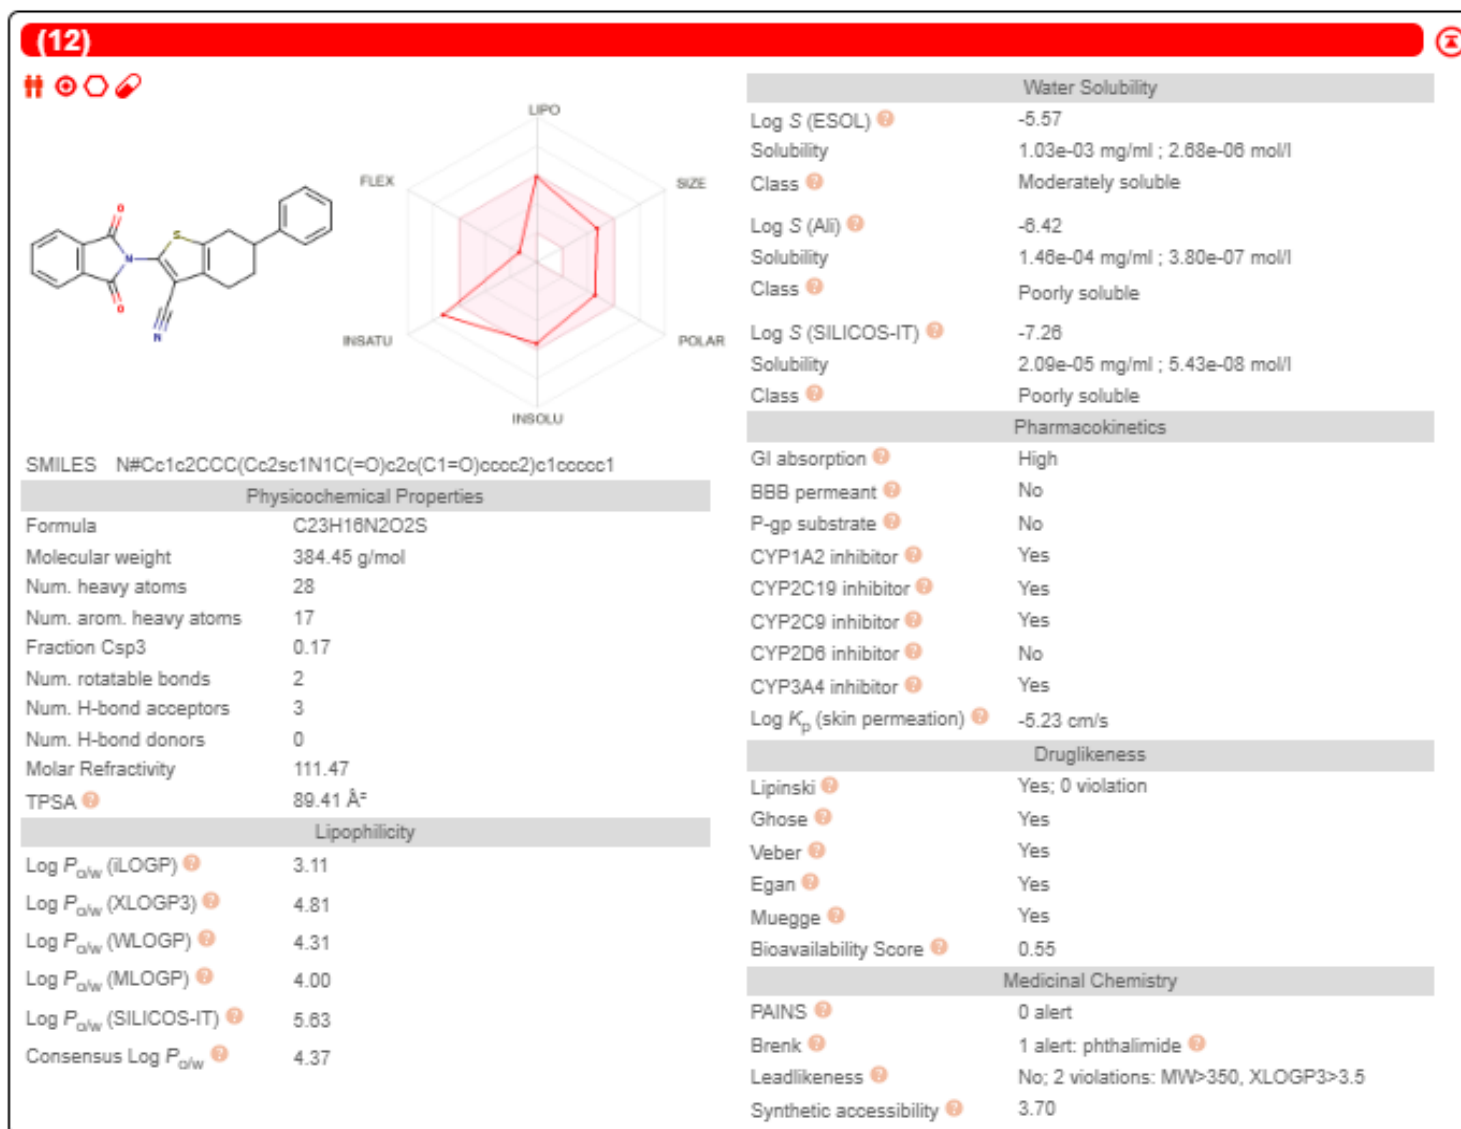

Fig. S12. ADME of compound 12.



Hide BOILED-Egg

Retrieve data:   POWERED BY  ChemAxon

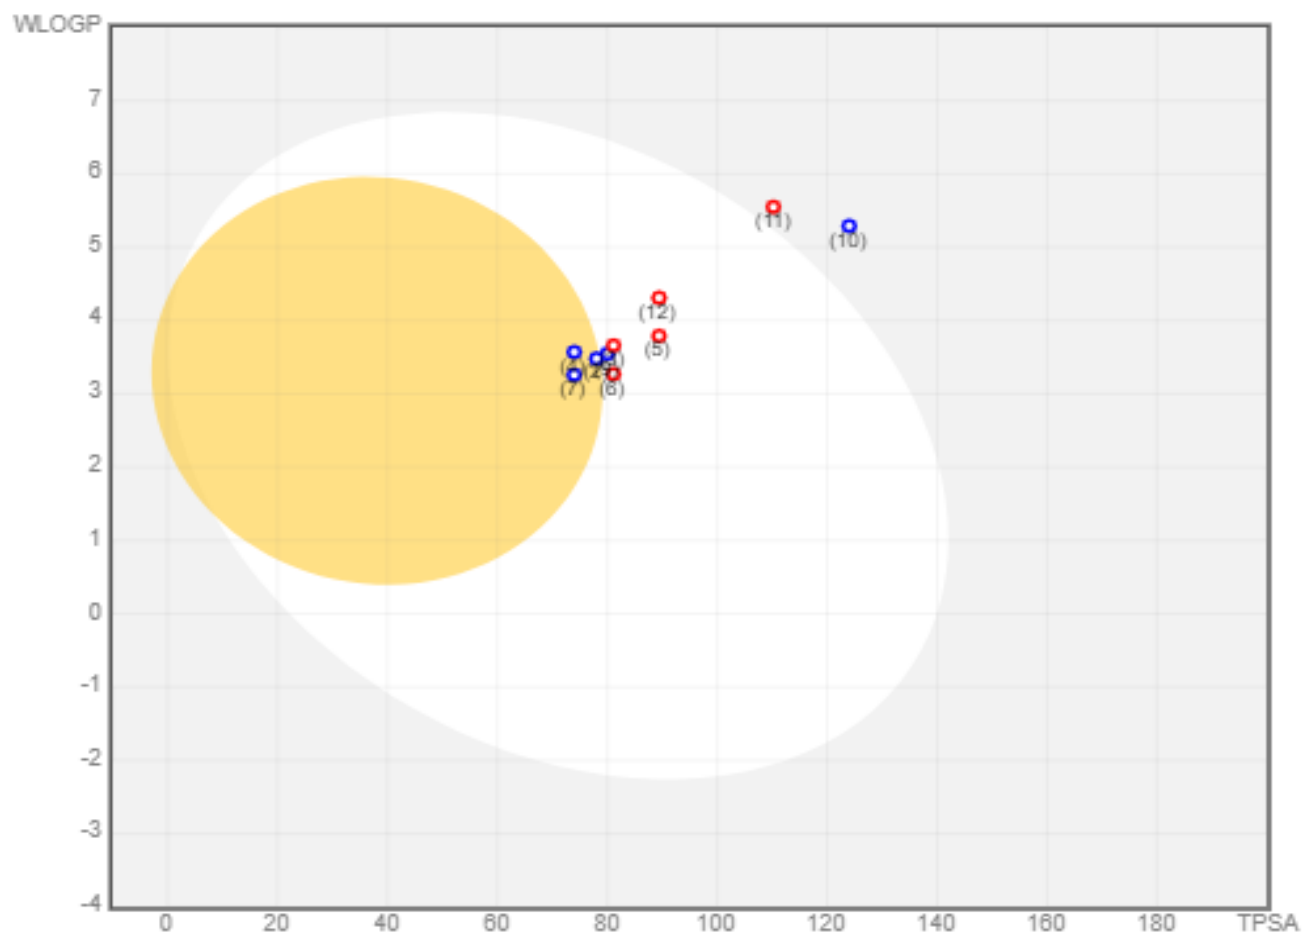

**Actions**

- Show Molecules Name

**Legends**

- BBB
- HIA
- PGP+
- PGP-

**Remarks**

1 molecule out of range!

Fig. S13. BOILED-EGG chart of compounds 2-10.

## **Experimental**

### **Cytotoxicity assay**

#### ***Materials and methods***

##### ***Cell lines***

The cell lines: mammary gland breast cancer (MCF7) and hepatocellular cancer (HePG2) were obtained from ATCC *via* Holding company for biological products and vaccines (VACSERA), Cairo, Egypt. Doxorubicin was used as a reference anticancer agent for comparison.

##### ***Chemical reagents***

The reagents RPMI-1640 medium, MTT, and DMSO (Sigma Co., St. Louis, USA), and Fetal bovine serum (GIBCO, UK).

##### ***MTT assay***

The cell lines mentioned above were used to determine the inhibitory effects of compounds on cell growth using the MTT assay.[41] This colorimetric assay is based on the conversion of the yellow tetrazolium bromide (MTT) to a purple formazan derivative by mitochondrial succinate dehydrogenase in viable cells. Cell lines were cultured in RPMI-1640 medium with 10% fetal bovine serum. Antibiotics added were 100 units/mL penicillin and 100 mg/mL streptomycin at 37 °C in a 5% CO<sub>2</sub> incubator. The cell lines were seeded in a 96-well plate at a density of  $1.0 \times 10^4$  cells/well at 37 °C for 48 h under 5% CO<sub>2</sub>. After incubation, the cells were treated with different concentrations of compounds and incubated for 24 h. After 24 h of drug treatment, 20 µL of MTT solution at 5 mg/mL was added and incubated for 4 h. Dimethyl sulfoxide (DMSO) in volume of 100 µL is added into each well to dissolve the purple formazan formed. The colorimetric assay is measured and recorded at an absorbance of 570 nm using a plate reader (EXL 800, USA). The relative cell viability in percentage was calculated as  $(A_{570} \text{ of treated samples} / A_{570} \text{ of untreated samples}) \times 100$ .

### ***Statistical analysis***

All data were presented as mean  $\pm$  SD ( $n = 3$ ) using the SPSS 13.0 program (SPSS Inc. USA).

### ***Molecular Docking***

All molecular modeling studies were investigated using Molecular Operating Environment (MOE, 2014.0901) software. All minimizations were performed with MOE until an RMSD gradient of  $0.1 \text{ kcal.mol}^{-1}\text{\AA}^{-1}$  with the MMFF94x force field, and the partial charges were automatically calculated. The X-ray crystallographic structure of tubulin (TUB) domain complexed with colchicine (COL) (PDB ID: 5NM5) was downloaded from the protein data bank (<https://www.rcsb.org/structure/5NM5>). For the co-crystallized enzyme, water molecules and ligands, which are not involved in the binding, were removed, and the protein was prepared for the docking study utilizing the Protonate 3D protocol in MOE with default options. The co-crystallized ligand (COL) was used to define the binding site for docking. The Triangle Matcher placement method and London dG scoring function were used for docking.

### ***ADME Profiling***

The ADME properties of all compounds were studied by the SwissADME free web tool (<http://www.swissadme.ch/index.php>), accessed on 26 Feb. 2024.

**Spectral Data:**

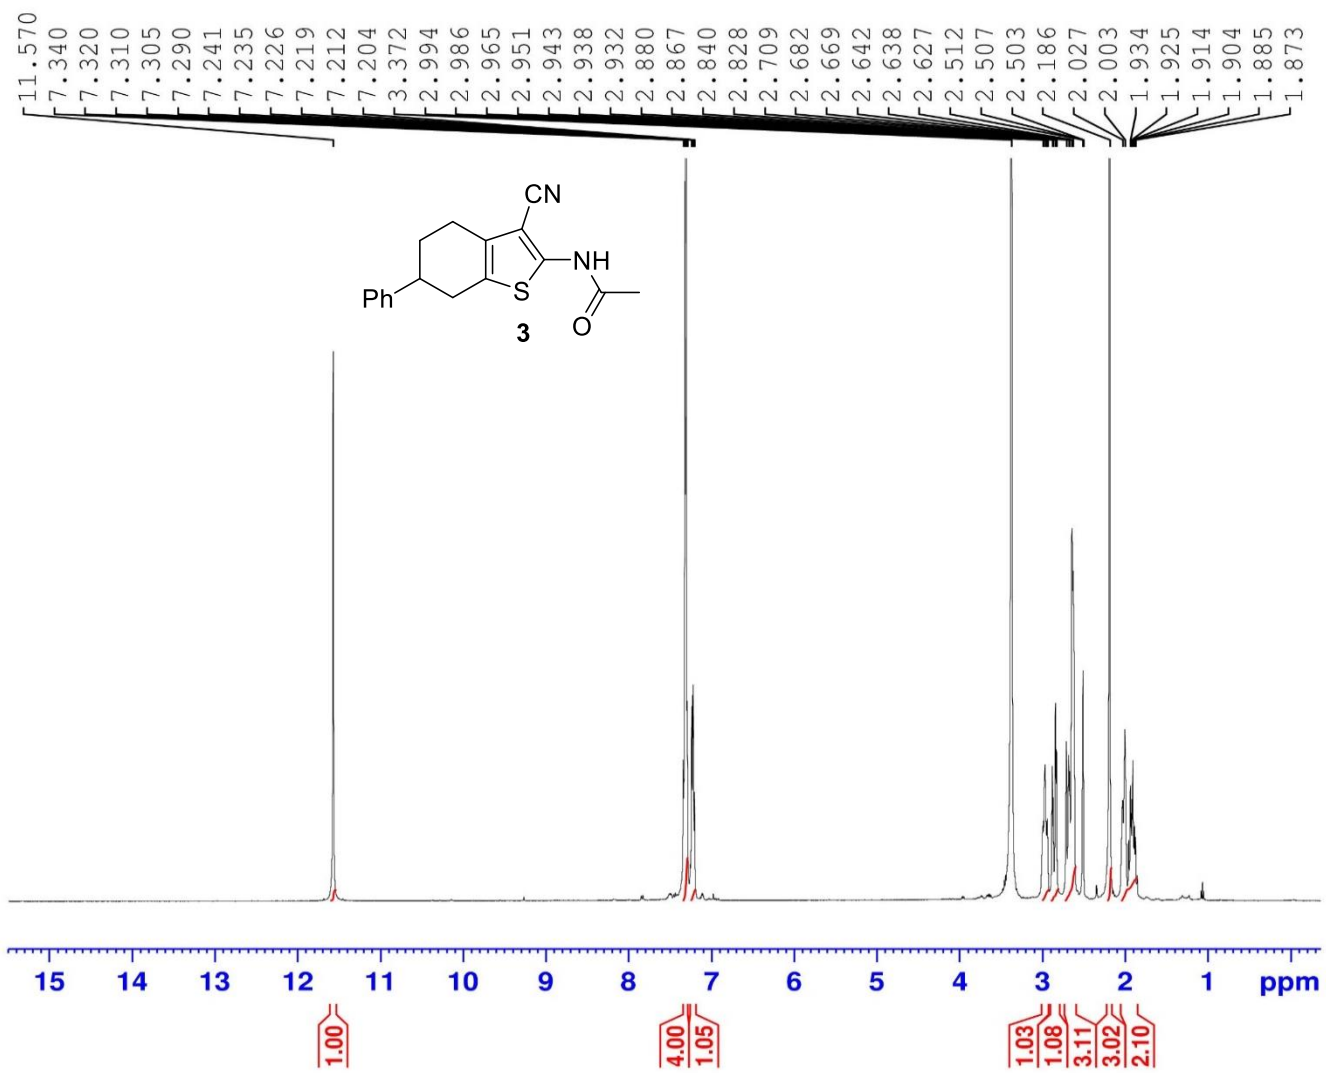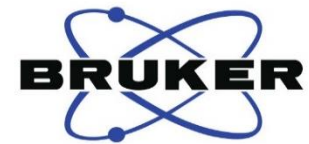

Current Data Parameters  
 NAME amna-shaabab-A1  
 EXPNO 1  
 PROCNO 1

F2 - Acquisition Parameters  
 Date\_ 20220913  
 Time 11.06  
 INSTRUM spect  
 PROBHD 5 mm PABBO BB/  
 PULPROG zg30  
 TD 65536  
 SOLVENT DMSO  
 NS 106  
 DS 2  
 SWH 8012.820 Hz  
 FIDRES 0.122266 Hz  
 AQ 4.0894465 sec  
 RG 205.37  
 DW 62.400 usec  
 DE 6.50 usec  
 TE 300.0 K  
 D1 1.00000000 sec  
 TD0 1

==== CHANNEL f1 =====  
 SFO1 400.1524711 MHz  
 NUC1 1H  
 P1 12.00 usec  
 PLW1 18.00000000 W

F2 - Processing parameters  
 SI 65536  
 SF 400.1500000 MHz  
 WDW EM  
 SSB 0  
 LB 0.30 Hz  
 GB 0  
 PC 1.00

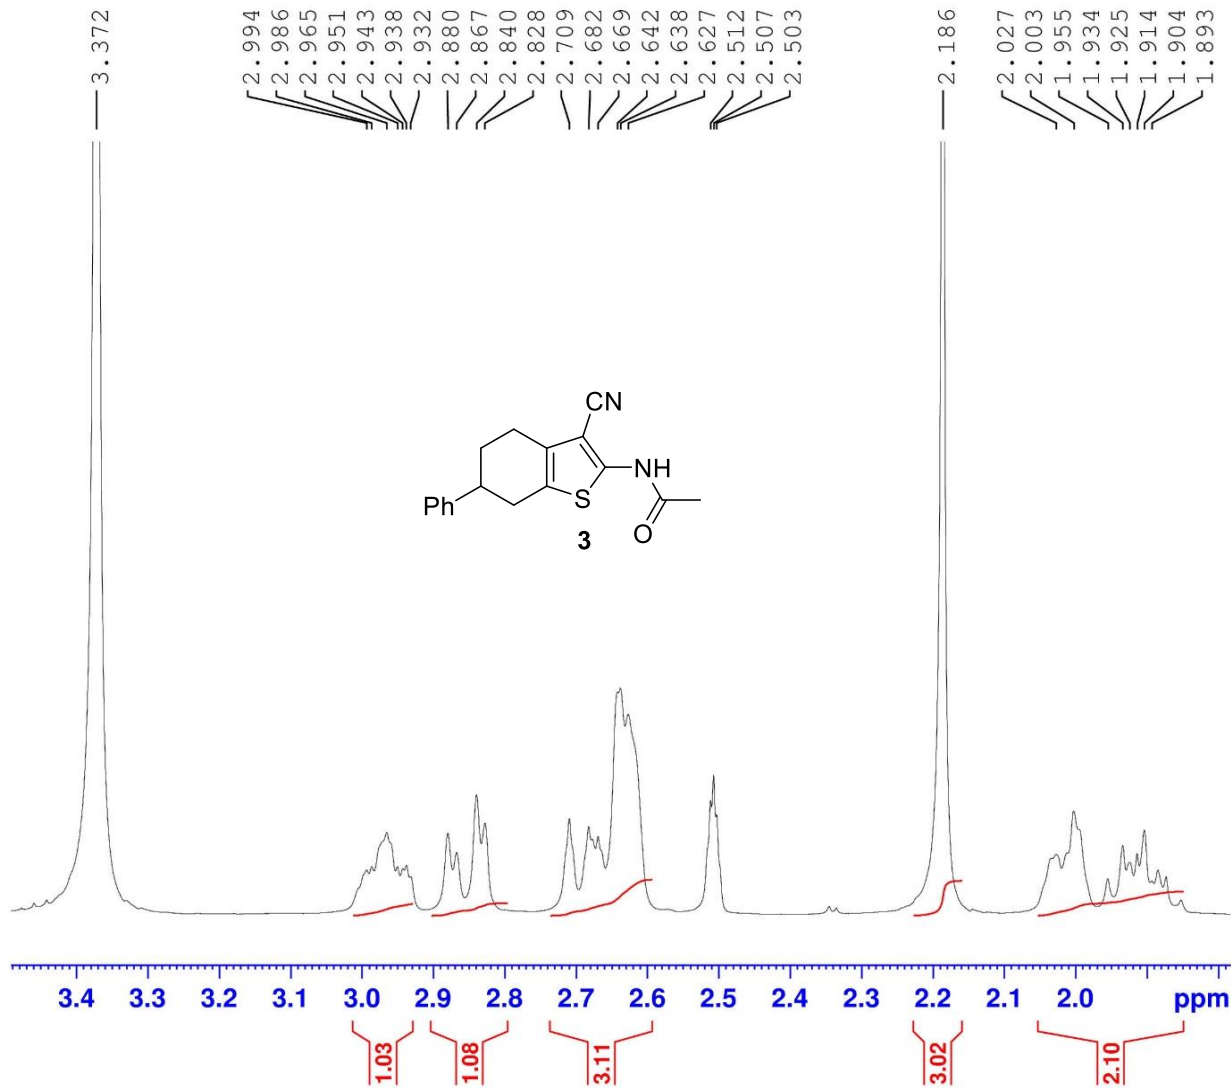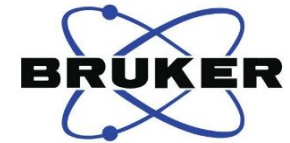

Current Data Parameters  
 NAME amna-shaabab-A1  
 EXPNO 1  
 PROCNO 1

F2 - Acquisition Parameters  
 Date\_ 20220913  
 Time 11.06  
 INSTRUM spect  
 PROBHD 5 mm PABBO BB/  
 PULPROG zg30  
 TD 65536  
 SOLVENT DMSO  
 NS 106  
 DS 2  
 SWH 8012.820 Hz  
 FIDRES 0.122266 Hz  
 AQ 4.0894465 sec  
 RG 205.37  
 DW 62.400 usec  
 DE 6.50 usec  
 TE 300.0 K  
 D1 1.00000000 sec  
 TD0 1

==== CHANNEL f1 =====  
 SFO1 400.1524711 MHz  
 NUC1 1H  
 P1 12.00 usec  
 PLW1 18.00000000 W

F2 - Processing parameters  
 SI 65536  
 SF 400.1500000 MHz  
 WDW EM  
 SSB 0  
 LB 0.30 Hz  
 GB 0  
 PC 1.00

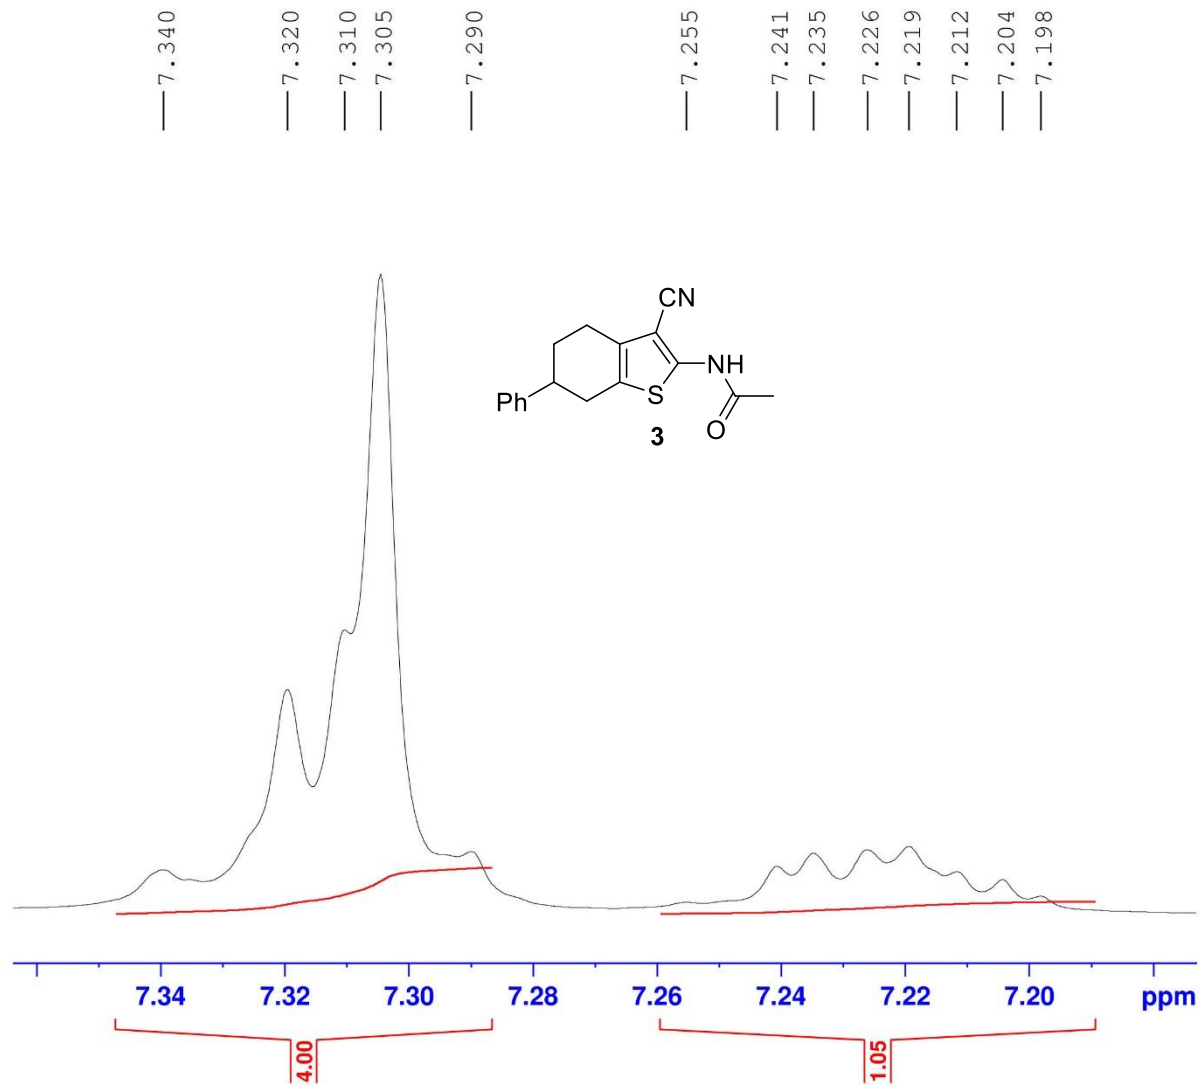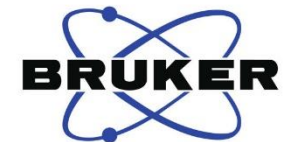

Current Data Parameters  
 NAME amna-shaaban-A1  
 EXPNO 1  
 PROCNO 1

F2 - Acquisition Parameters  
 Date\_ 20220913  
 Time\_ 11.06  
 INSTRUM spect  
 PROBHD 5 mm PABBO BB/  
 PULPROG zg30  
 TD 65536  
 SOLVENT DMSO  
 NS 106  
 DS 2  
 SWH 8012.820 Hz  
 FIDRES 0.122266 Hz  
 AQ 4.0894465 sec  
 RG 205.37  
 DW 62.400 usec  
 DE 6.50 usec  
 TE 300.0 K  
 D1 1.00000000 sec  
 TD0 1

===== CHANNEL f1 =====  
 SFO1 400.1524711 MHz  
 NUC1 1H  
 P1 12.00 usec  
 PLW1 18.00000000 W

F2 - Processing parameters  
 SI 65536  
 SF 400.1500000 MHz  
 WDW EM  
 SSB 0  
 LB 0.30 Hz  
 GB 0  
 PC 1.00

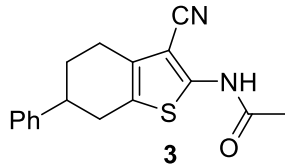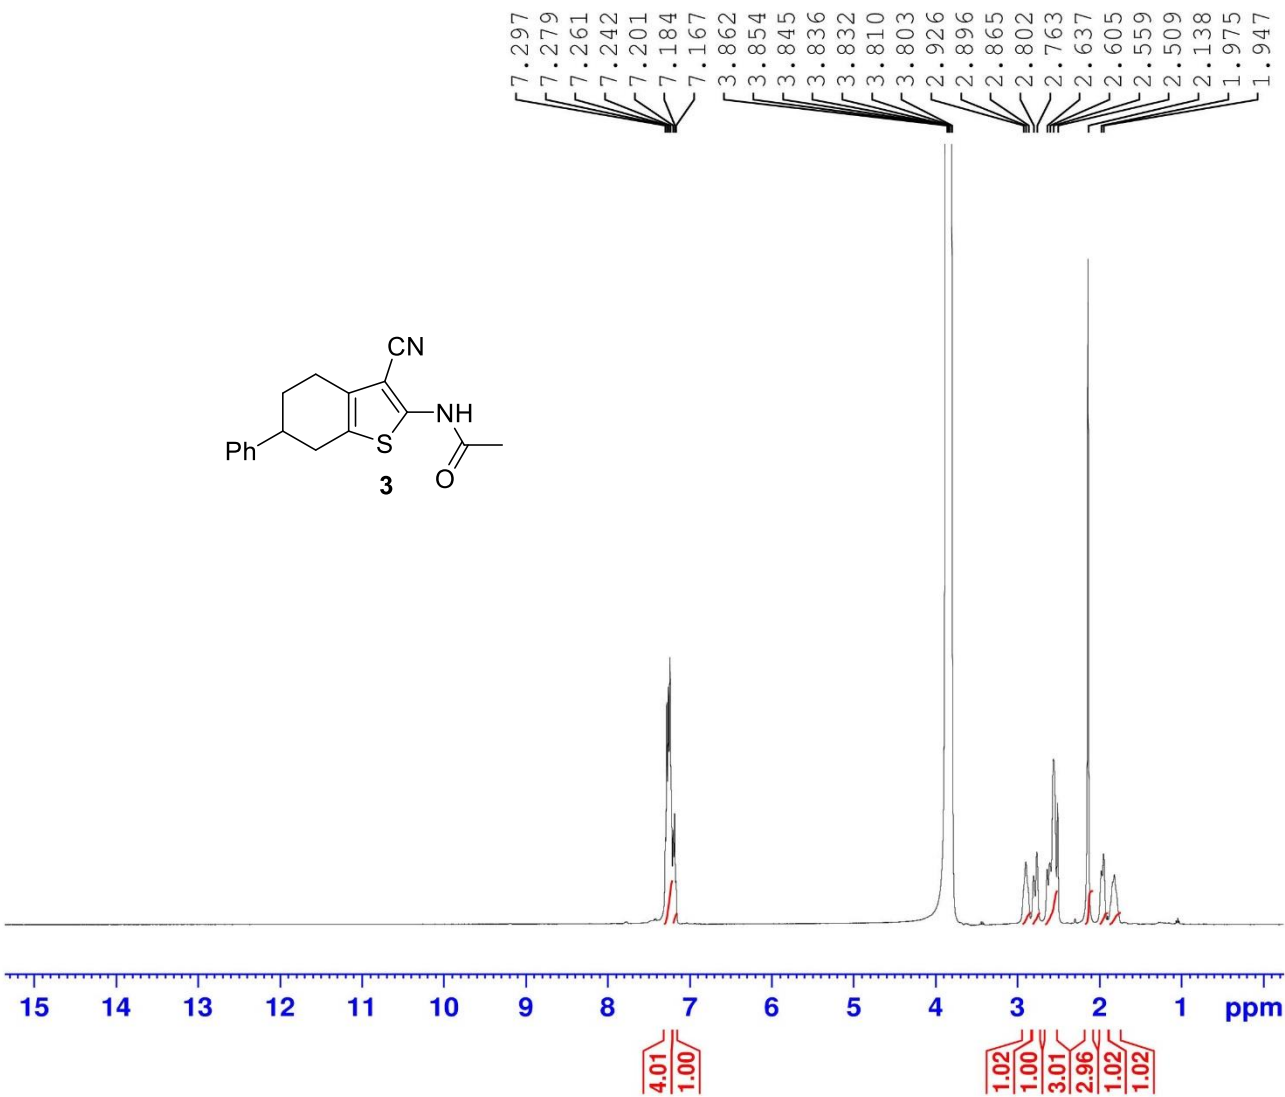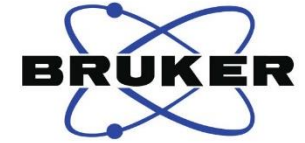

Current Data Parameters  
 NAME amna-shaaban-A1-d2o  
 EXPNO 1  
 PROCNO 1

F2 - Acquisition Parameters  
 Date\_ 20220920  
 Time 9.16  
 INSTRUM spect  
 PROBHD 5 mm PABBO BB/  
 PULPROG zg30  
 TD 65536  
 SOLVENT DMSO  
 NS 98  
 DS 2  
 SWH 8012.820 Hz  
 FIDRES 0.122266 Hz  
 AQ 4.0894465 sec  
 RG 126.31  
 DW 62.400 usec  
 DE 6.50 usec  
 TE 300.0 K  
 D1 1.0000000 sec  
 TD0 1

==== CHANNEL f1 =====  
 SFO1 400.1524711 MHz  
 NUC1 1H  
 P1 12.00 usec  
 PLW1 18.0000000 W

F2 - Processing parameters  
 SI 65536  
 SF 400.1500000 MHz  
 WDW EM  
 SSB 0  
 LB 0 0.30 Hz  
 GB 0  
 PC 1.00



sayed-karam-A1 #190 RT: 3.20 AV: 1 SB: 26 1.21-1.34 , 0.87-1.14 NL: 4.31E8  
T: {0,0} + c EI Full ms [40.00-1000.00]

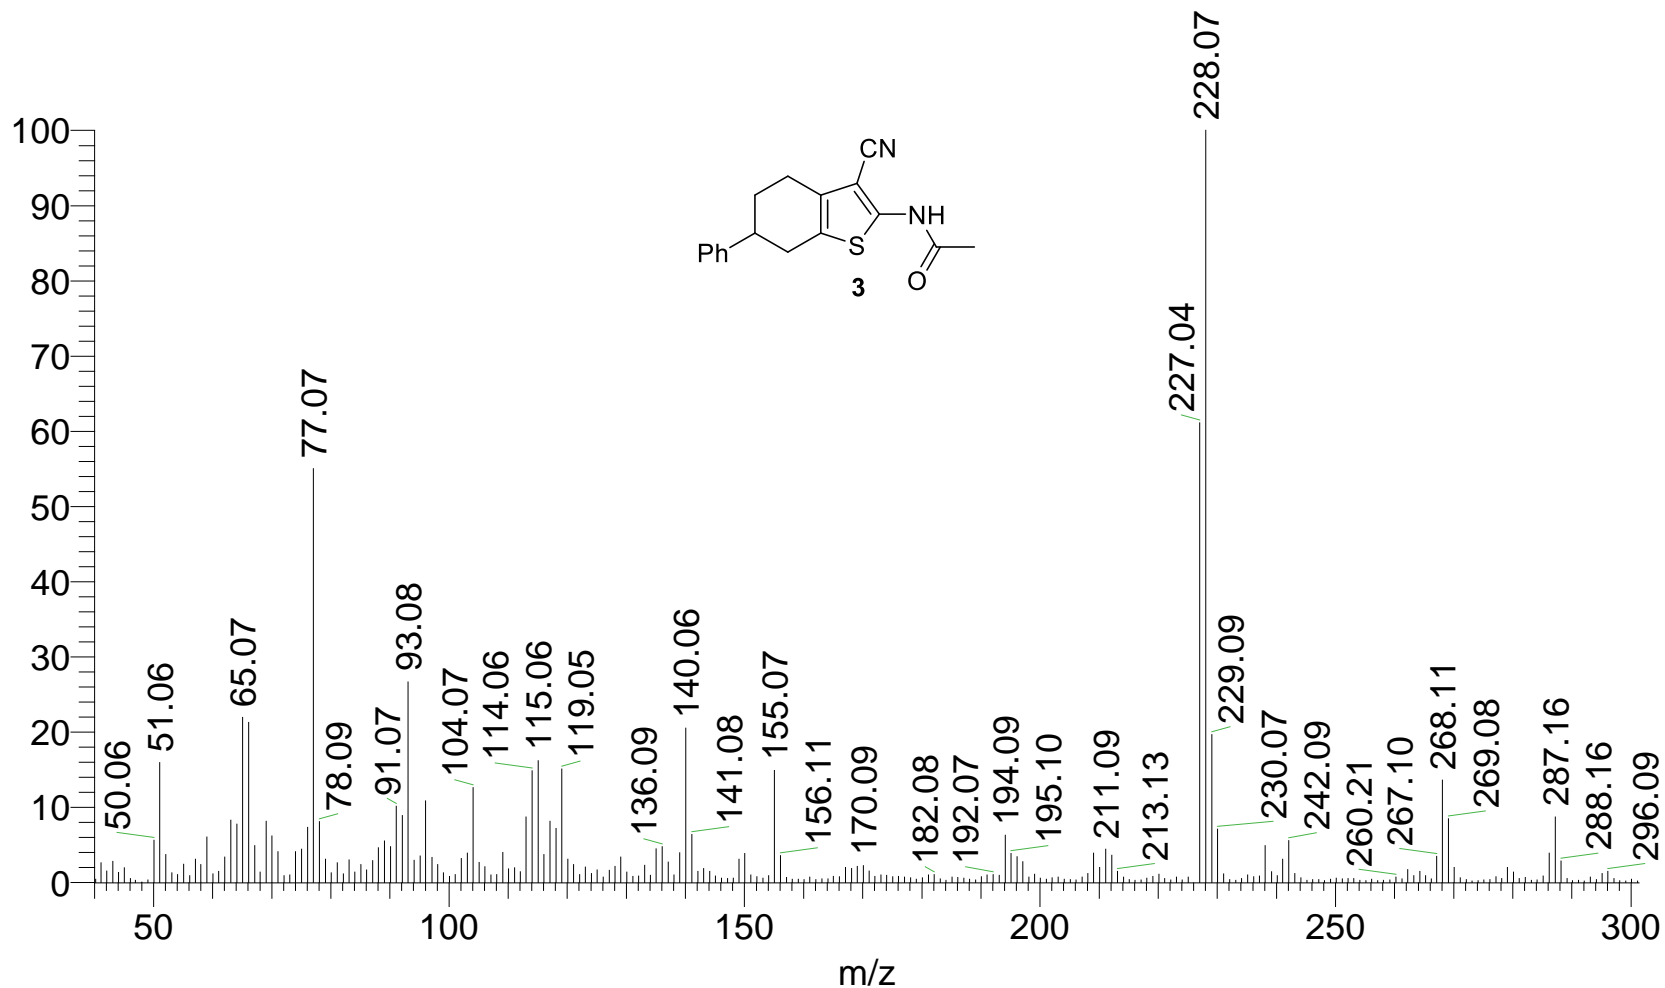

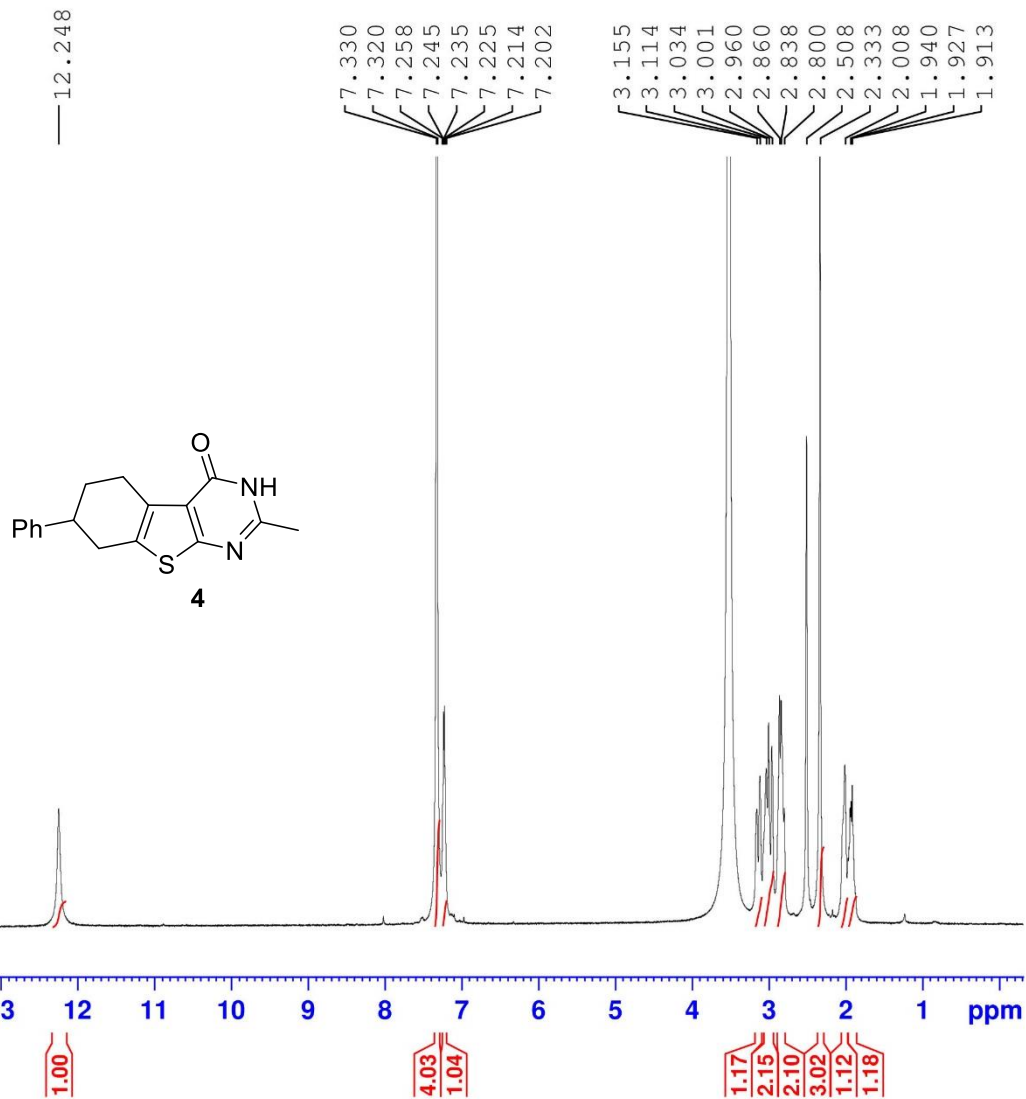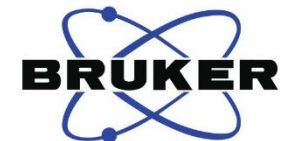

Current Data Parameters  
 NAME amna-shaabab-A2  
 EXPNO 1  
 PROCNO 1

F2 - Acquisition Parameters  
 Date\_ 20220913  
 Time 10.04  
 INSTRUM spect  
 PROBHD 5 mm PABBO BB/  
 PULPROG zg30  
 TD 65536  
 SOLVENT DMSO  
 NS 88  
 DS 2  
 SWH 8012.820 Hz  
 FIDRES 0.122266 Hz  
 AQ 4.0894465 sec  
 RG 205.37  
 DW 62.400 usec  
 DE 6.50 usec  
 TE 300.0 K  
 D1 1.00000000 sec  
 TD0 1

==== CHANNEL f1 =====  
 SFO1 400.1524711 MHz  
 NUC1 1H  
 P1 12.00 usec  
 PLW1 18.00000000 W

F2 - Processing parameters  
 SI 65536  
 SF 400.1500000 MHz  
 WDW EM  
 SSB 0  
 LB 0.30 Hz  
 GB 0  
 PC 1.00

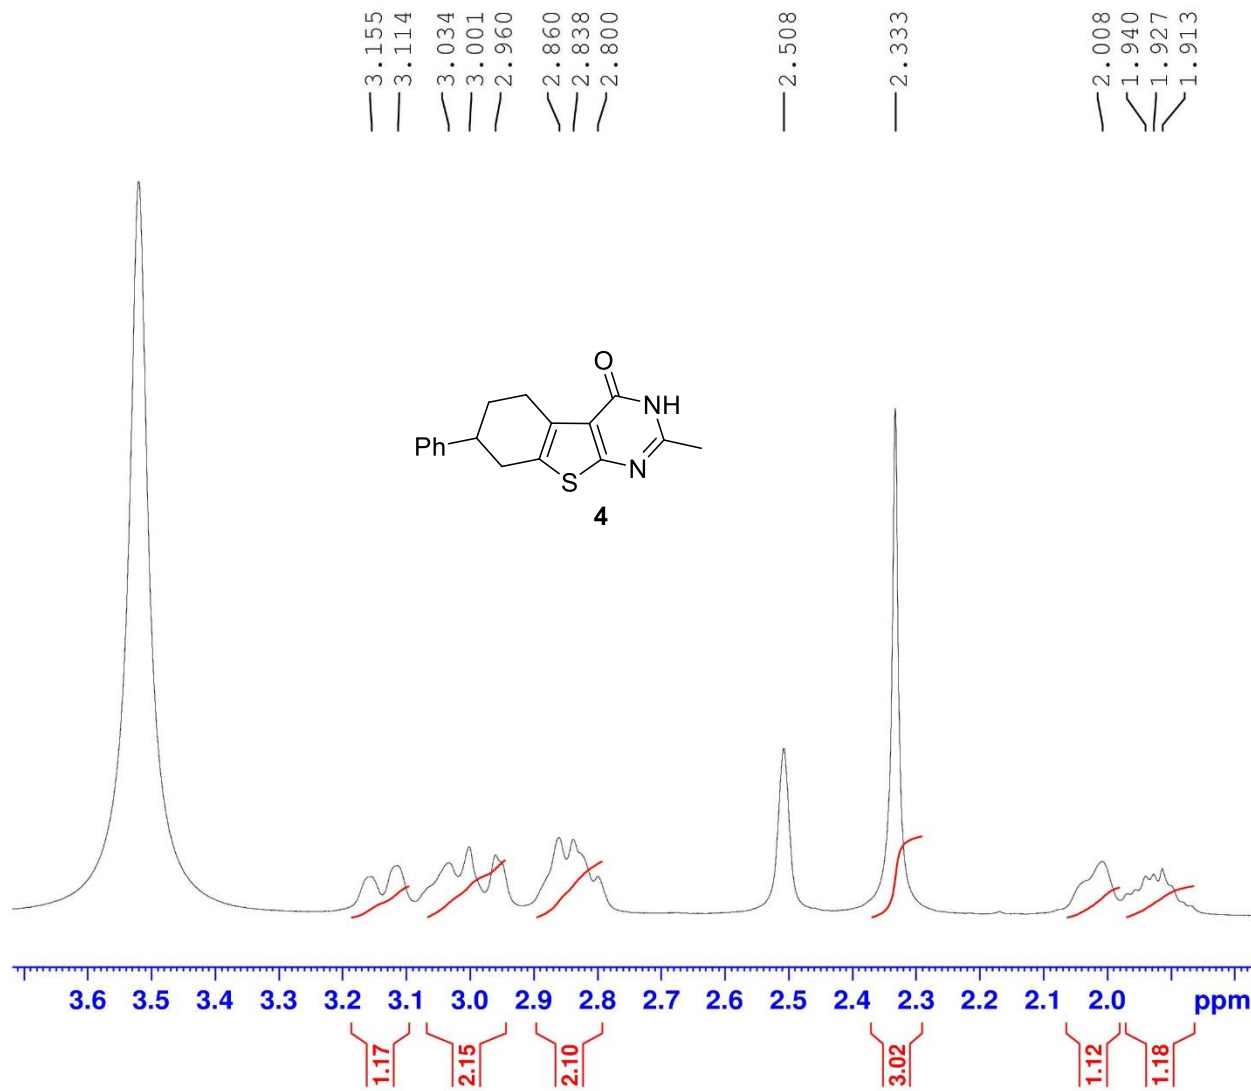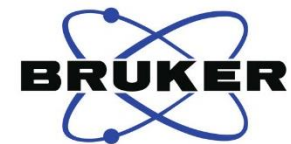

Current Data Parameters  
 NAME amna-shaabab-A2  
 EXPNO 1  
 PROCNO 1

F2 - Acquisition Parameters  
 Date\_ 20220913  
 Time 10.04  
 INSTRUM spect  
 PROBHD 5 mm PABBO BB/  
 PULPROG zg30  
 TD 65536  
 SOLVENT DMSO  
 NS 88  
 DS 2  
 SWH 8012.820 Hz  
 FIDRES 0.122266 Hz  
 AQ 4.0894465 sec  
 RG 205.37  
 DW 62.400 usec  
 DE 6.50 usec  
 TE 300.0 K  
 D1 1.00000000 sec  
 TD0 1

==== CHANNEL f1 =====  
 SFO1 400.1524711 MHz  
 NUC1 1H  
 P1 12.00 usec  
 PLW1 18.00000000 W

F2 - Processing parameters  
 SI 65536  
 SF 400.1500000 MHz  
 WDW EM  
 SSB 0  
 LB 0.30 Hz  
 GB 0  
 PC 1.00

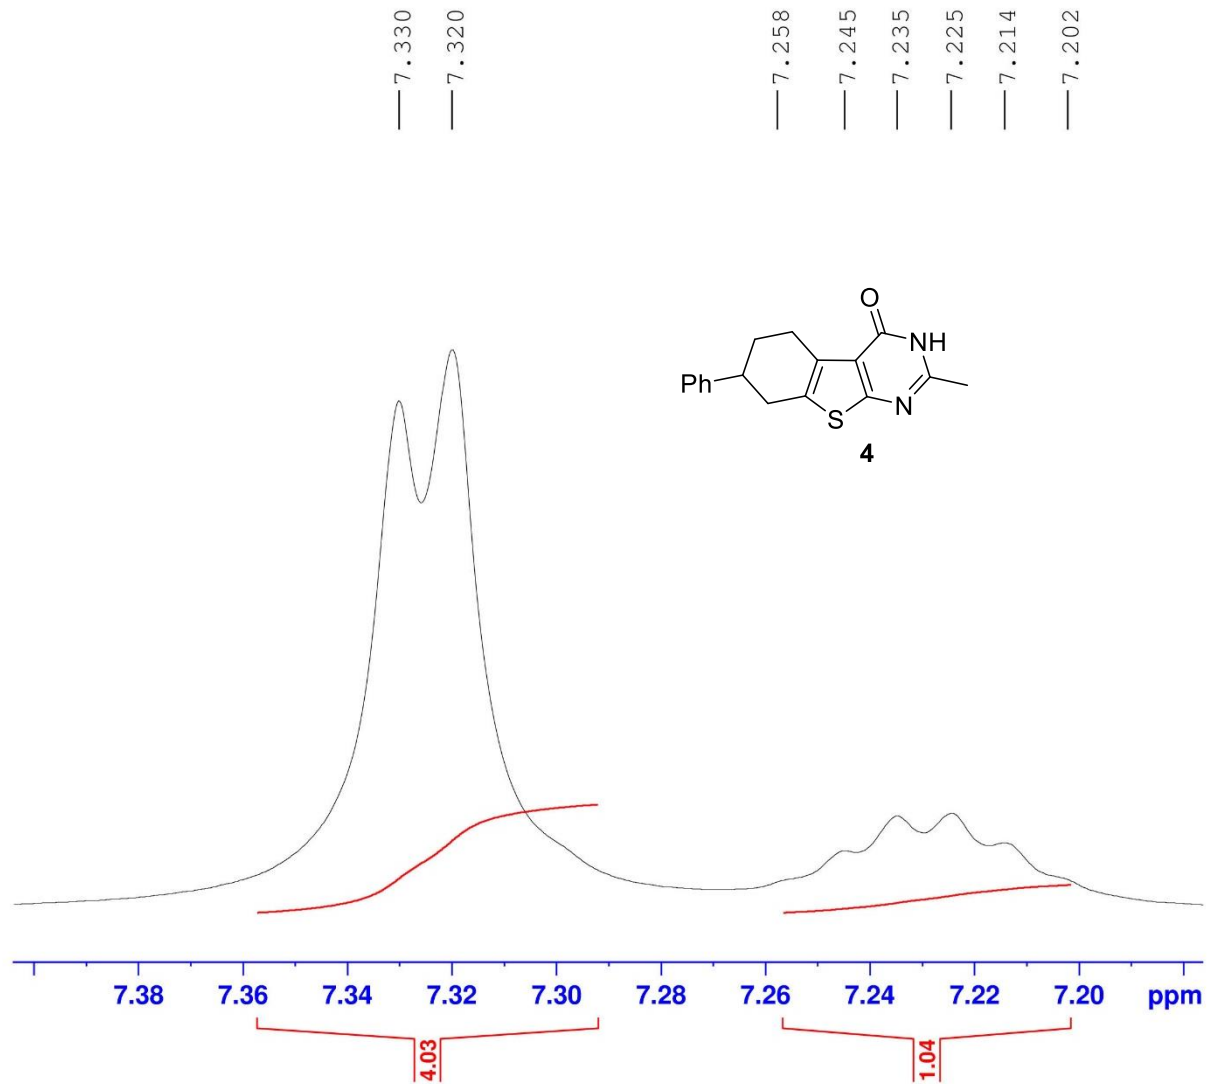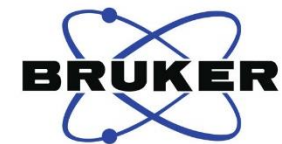

Current Data Parameters  
 NAME amna-shaabab-A2  
 EXPNO 1  
 PROCNO 1

F2 - Acquisition Parameters  
 Date\_ 20220913  
 Time 10.04  
 INSTRUM spect  
 PROBHD 5 mm PABBO BB/  
 PULPROG zg30  
 TD 65536  
 SOLVENT DMSO  
 NS 88  
 DS 2  
 SWH 8012.820 Hz  
 FIDRES 0.122266 Hz  
 AQ 4.0894465 sec  
 RG 205.37  
 DW 62.400 usec  
 DE 6.50 usec  
 TE 300.0 K  
 D1 1.00000000 sec  
 TD0 1

===== CHANNEL f1 =====  
 SFO1 400.1524711 MHz  
 NUC1 1H  
 P1 12.00 usec  
 PLW1 18.00000000 W

F2 - Processing parameters  
 SI 65536  
 SF 400.1500000 MHz  
 WDW EM  
 SSB 0  
 LB 0.30 Hz  
 GB 0  
 PC 1.00

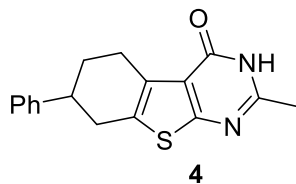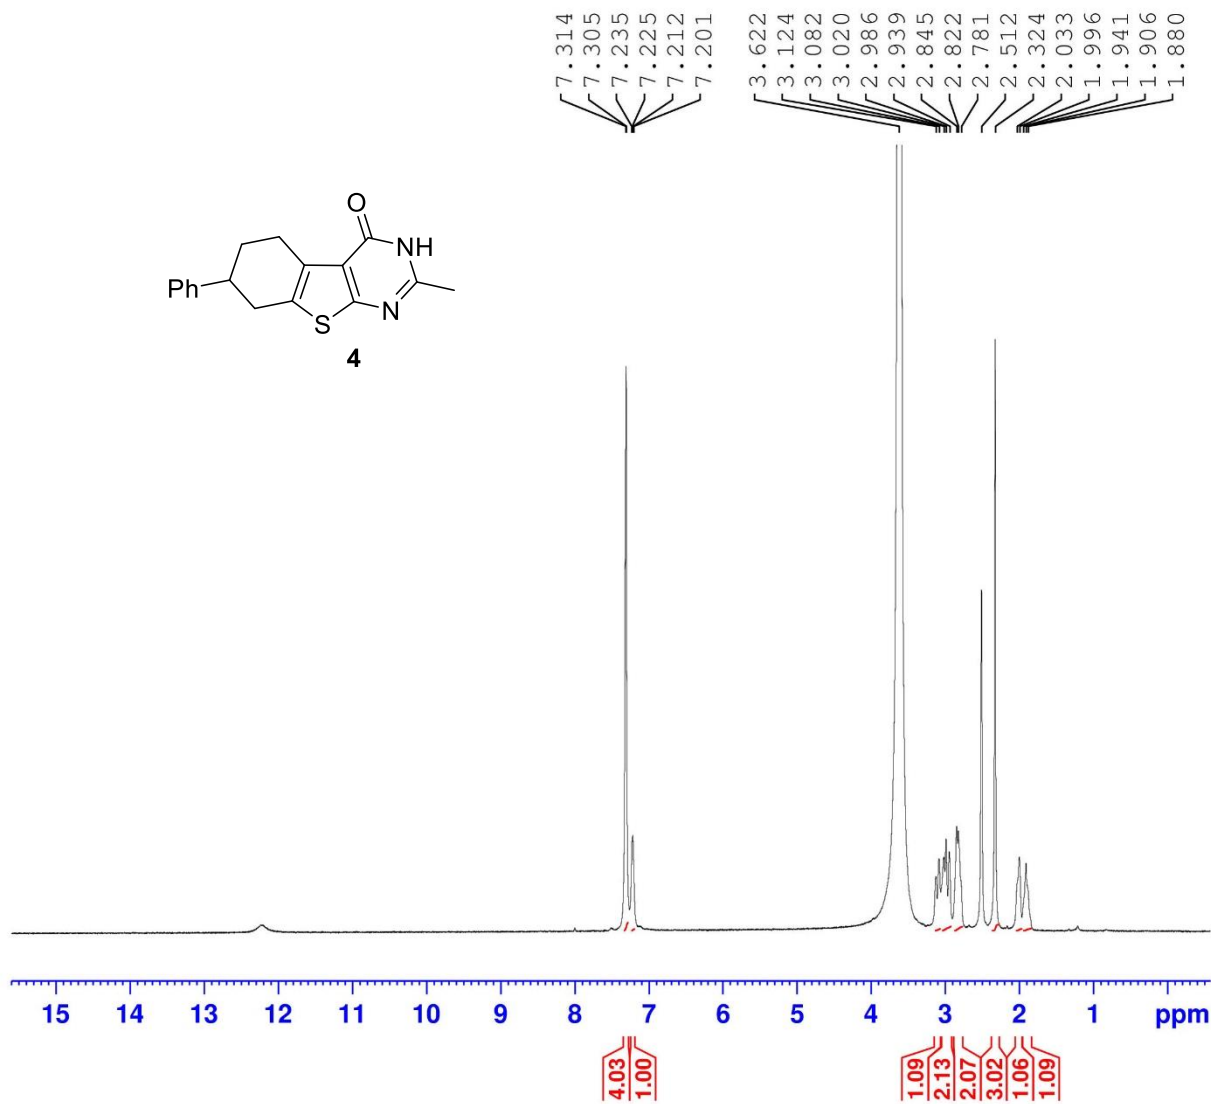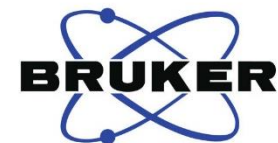

Current Data Parameters  
 NAME amna-shaaban-A2-d2o  
 EXPNO 2  
 PROCNO 1

F2 - Acquisition Parameters  
 Date\_ 20220920  
 Time 8.56  
 INSTRUM spect  
 PROBHD 5 mm PABBO BB/  
 PULPROG zg30  
 TD 65536  
 SOLVENT DMSO  
 NS 85  
 DS 2  
 SWH 8012.820 Hz  
 FIDRES 0.122266 Hz  
 AQ 4.0894465 sec  
 RG 205.37  
 DW 62.400 usec  
 DE 6.50 usec  
 TE 300.0 K  
 D1 1.0000000 sec  
 TD0 1

===== CHANNEL f1 =====  
 SFO1 400.1524711 MHz  
 NUC1 1H  
 P1 12.00 usec  
 PLW1 18.00000000 W

F2 - Processing parameters  
 SI 65536  
 SF 400.1500000 MHz  
 WDW EM  
 SSB 0  
 LB 0.30 Hz  
 GB 0  
 PC 1.00

Analyst  
Date

Administrator  
01 September 2022 11:38

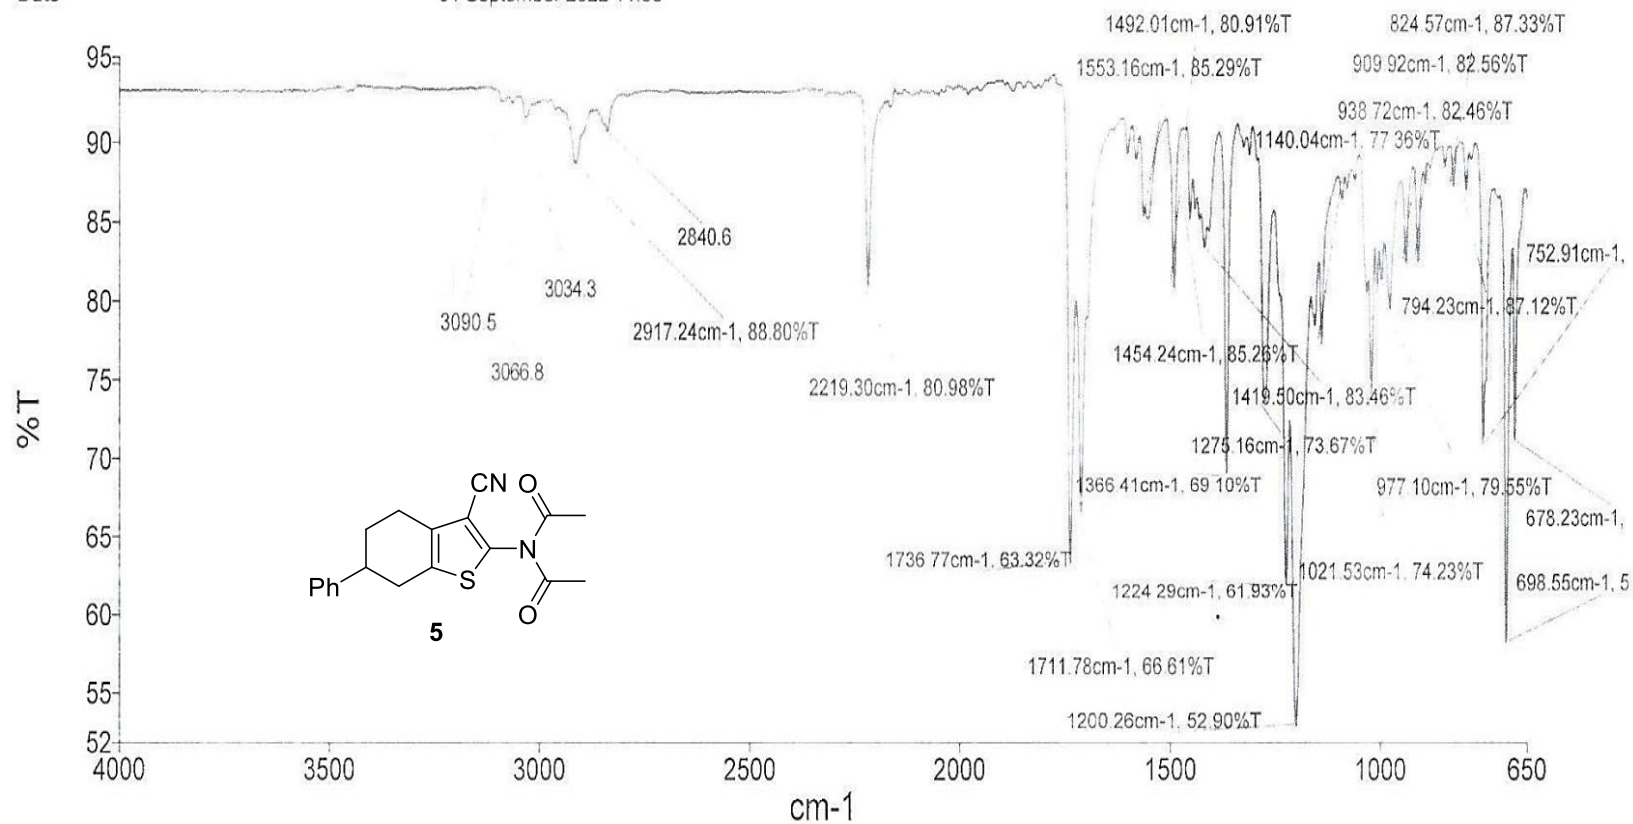

| Sample Name | Description                                                  | Quality Checks                                                |
|-------------|--------------------------------------------------------------|---------------------------------------------------------------|
| A31         | Sample 001 By Administrator Date Thursday, September 01 2022 | The Quality Checks do not report any warnings for the sample. |

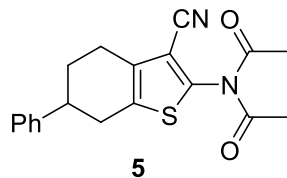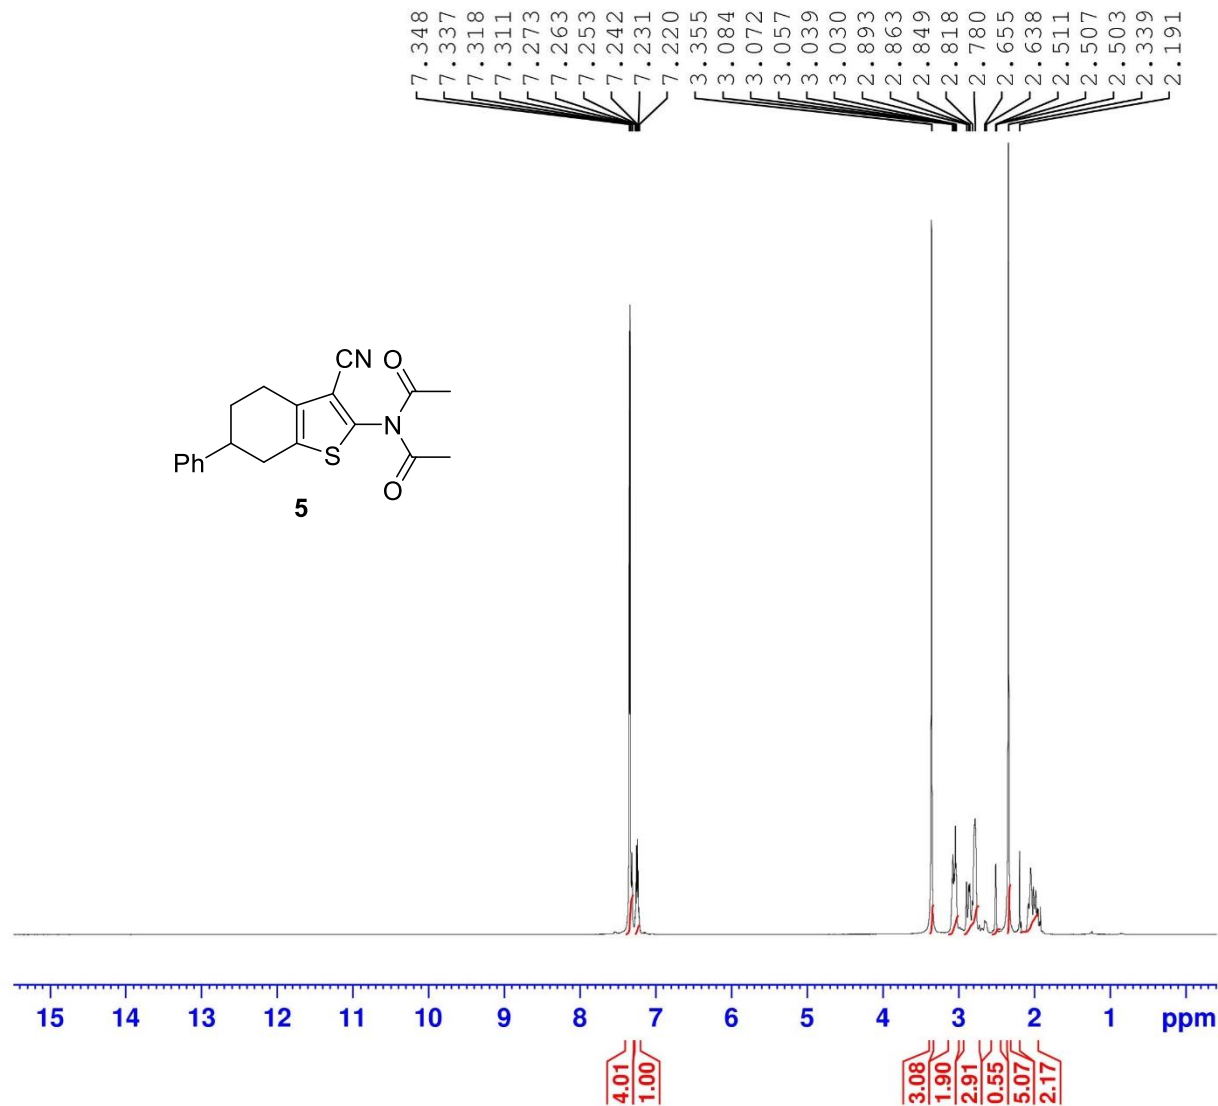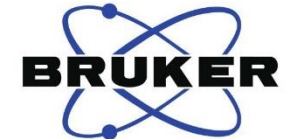

Current Data Parameters  
 NAME amna-shaaban-A31  
 EXPNO 2  
 PROCNO 1

F2 - Acquisition Parameters  
 Date\_ 20220912  
 Time 12.55  
 INSTRUM spect  
 PROBHD 5 mm PABBO BB/  
 PULPROG zg30  
 TD 65536  
 SOLVENT DMSO  
 NS 128  
 DS 2  
 SWH 8012.820 Hz  
 FIDRES 0.122266 Hz  
 AQ 4.0894465 sec  
 RG 205.37  
 DW 62.400 usec  
 DE 6.50 usec  
 TE 300.0 K  
 D1 1.00000000 sec  
 TD0 1

===== CHANNEL f1 =====  
 SFO1 400.1524711 MHz  
 NUC1 1H  
 P1 12.00 usec  
 PLW1 18.00000000 W

F2 - Processing parameters  
 SI 65536  
 SF 400.1500000 MHz  
 WDW EM  
 SSB 0  
 LB 0.30 Hz  
 GB 0  
 PC 1.00

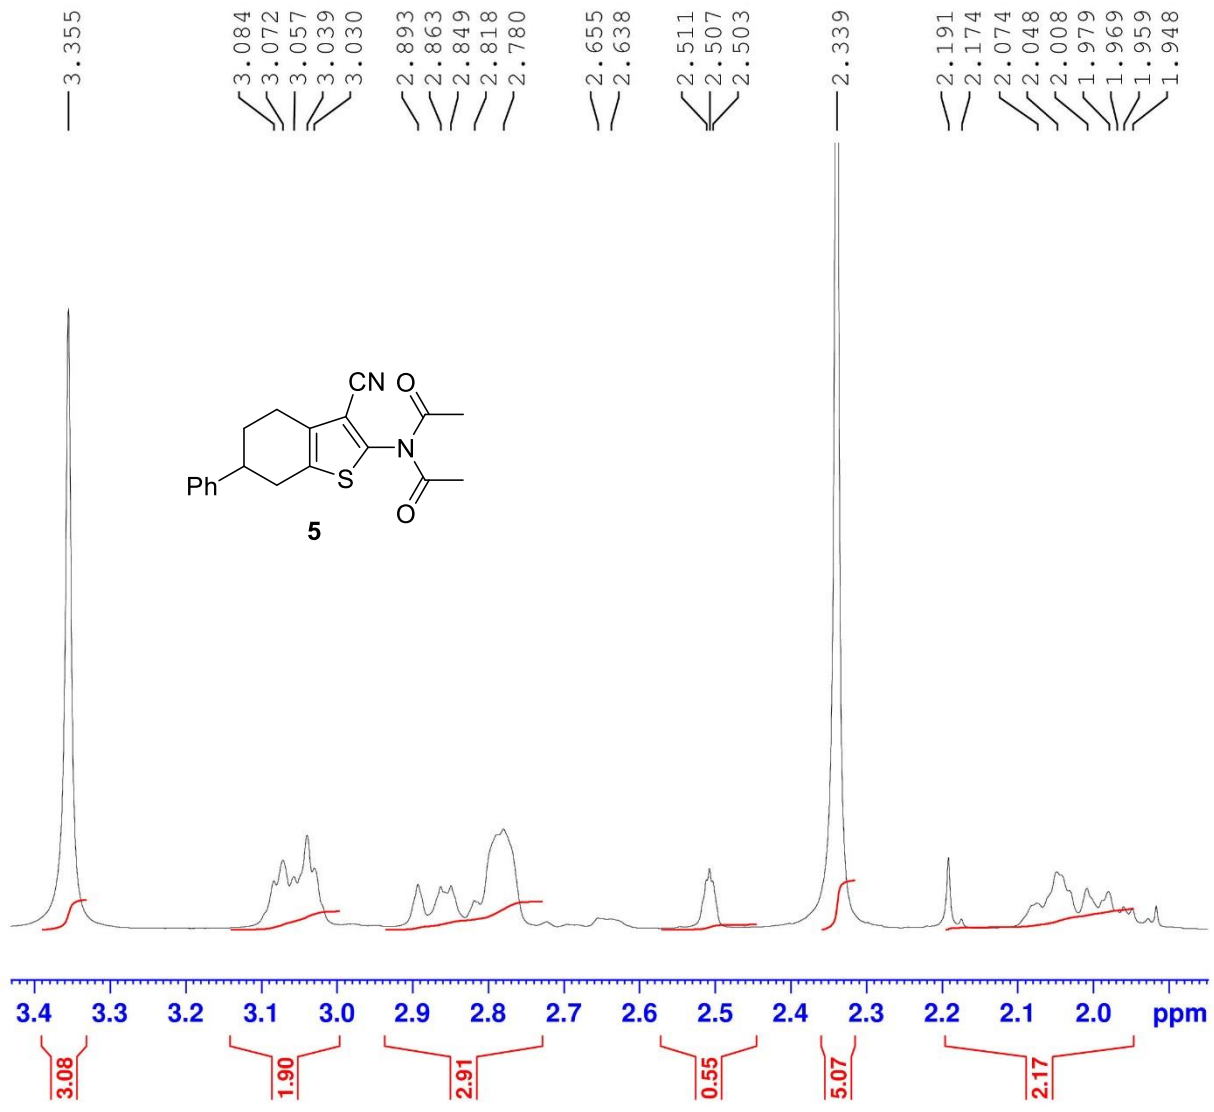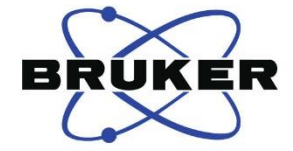

Current Data Parameters  
 NAME amna-shaaban-A31  
 EXPNO 2  
 PROCNO 1

F2 - Acquisition Parameters  
 Date\_ 20220912  
 Time 12.55  
 INSTRUM spect  
 PROBHD 5 mm PABBO BB/  
 PULPROG zg30  
 TD 65536  
 SOLVENT DMSO  
 NS 128  
 DS 2  
 SWH 8012.820 Hz  
 FIDRES 0.122266 Hz  
 AQ 4.089465 sec  
 RG 205.37  
 DW 62.400 usec  
 DE 6.50 usec  
 TE 300.0 K  
 D1 1.0000000 sec  
 TD0 1

===== CHANNEL f1 =====  
 SFO1 400.1524711 MHz  
 NUC1 1H  
 P1 12.00 usec  
 PLW1 18.0000000 W

F2 - Processing parameters  
 SI 65536  
 SF 400.1500000 MHz  
 WDW EM  
 SSB 0  
 LB 0.30 Hz  
 GB 0  
 PC 1.00



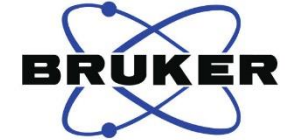

Current Data Parameters  
NAME amna-shaaban-A31  
EXPNO 2  
PROCNO 1

F2 - Acquisition Parameters  
Date\_ 20220912  
Time 12.55  
INSTRUM spect  
PROBHD 5 mm PABBO BB/  
PULPROG zg30  
TD 65536  
SOLVENT DMSO  
NS 128  
DS 2  
SWH 8012.820 Hz  
FIDRES 0.122266 Hz  
AQ 4.0894465 sec  
RG 205.37  
DW 62.400 usec  
DE 6.50 usec  
TE 300.0 K  
D1 1.00000000 sec  
TD0 1

===== CHANNEL f1 =====  
SFO1 400.1524711 MHz  
NUC1 1H  
P1 12.00 usec  
PLW1 18.00000000 W

F2 - Processing parameters  
SI 65536  
SF 400.1500000 MHz  
WDW EM  
SSB 0  
LB 0.30 Hz  
GB 0  
PC 1.00

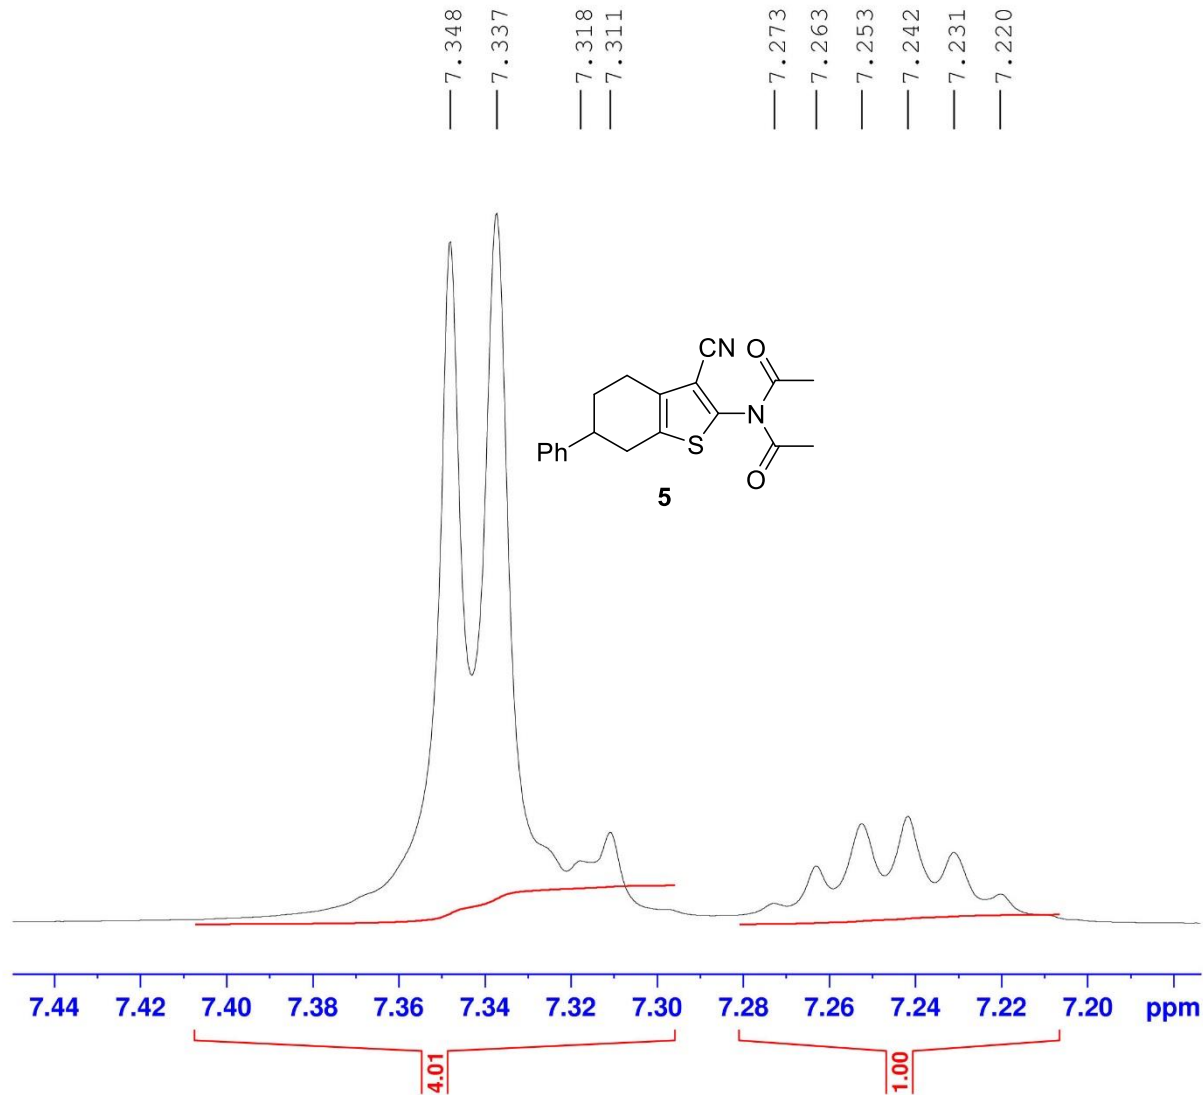

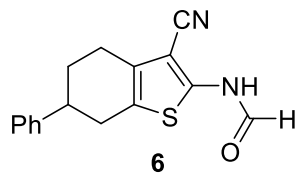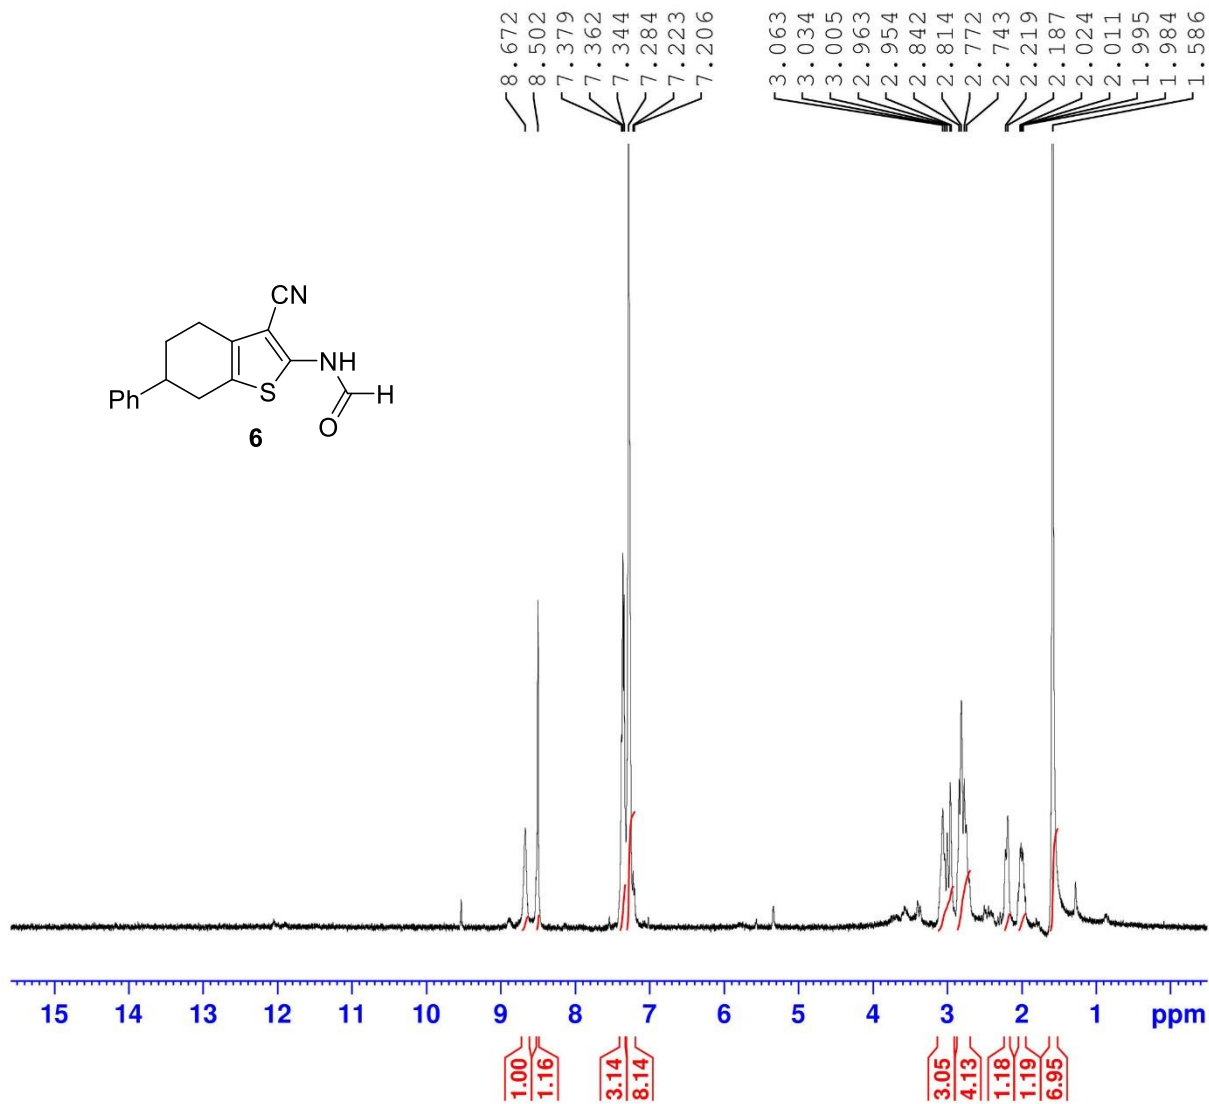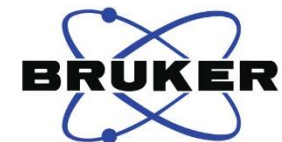

Current Data Parameters  
NAME amna-shaaban-A5  
EXPNO 2  
PROCNO 1

F2 - Acquisition Parameters  
Date\_ 20220912  
Time 12.21  
INSTRUM spect  
PROBHD 5 mm PABBO BB/  
PULPROG zg30  
TD 65536  
SOLVENT CDCl3  
NS 256  
DS 2  
SWH 8012.820 Hz  
FIDRES 0.122266 Hz  
AQ 4.0894465 sec  
RG 205.37  
DW 62.400 usec  
DE 6.50 usec  
TE 300.0 K  
D1 1.00000000 sec  
TD0 1

==== CHANNEL f1 =====  
SFO1 400.1524711 MHz  
NUC1 1H  
P1 12.00 usec  
PLW1 18.00000000 W

F2 - Processing parameters  
SI 65536  
SF 400.1500000 MHz  
WDW EM  
SSB 0  
LB 0.30 Hz  
GB 0  
PC 1.00

3.063  
3.034  
3.005  
2.963  
2.954  
2.842  
2.814  
2.772  
2.743

2.219  
2.187  
2.024  
2.011  
1.995  
1.984

1.586

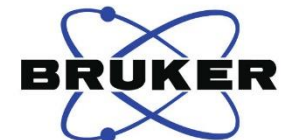

Current Data Parameters  
NAME amna-shaaban-A5  
EXPNO 2  
PROCNO 1

F2 - Acquisition Parameters  
Date\_ 20220912  
Time 12.21  
INSTRUM spect  
PROBHD 5 mm PABBO BB/  
PULPROG zg30  
TD 65536  
SOLVENT CDCl3  
NS 256  
DS 2  
SWH 8012.820 Hz  
FIDRES 0.122266 Hz  
AQ 4.0894465 sec  
RG 205.37  
DW 62.400 usec  
DE 6.50 usec  
TE 300.0 K  
D1 1.00000000 sec  
TD0 1

===== CHANNEL f1 =====  
SFO1 400.1524711 MHz  
NUC1 1H  
P1 12.00 usec  
PLW1 18.00000000 W

F2 - Processing parameters  
SI 65536  
SF 400.1500000 MHz  
WDW EM  
SSB 0  
LB 0.30 Hz  
GB 0  
PC 1.00

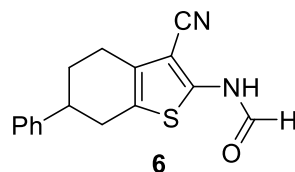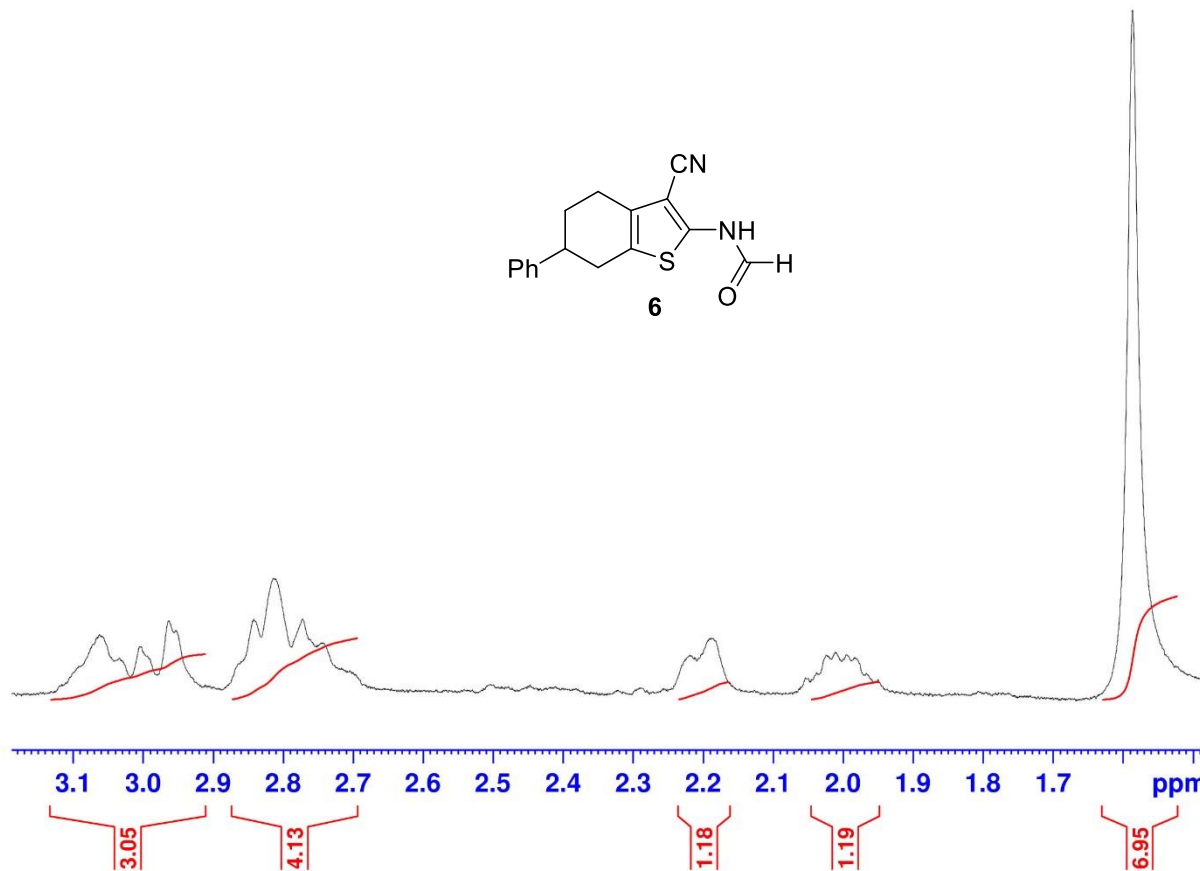

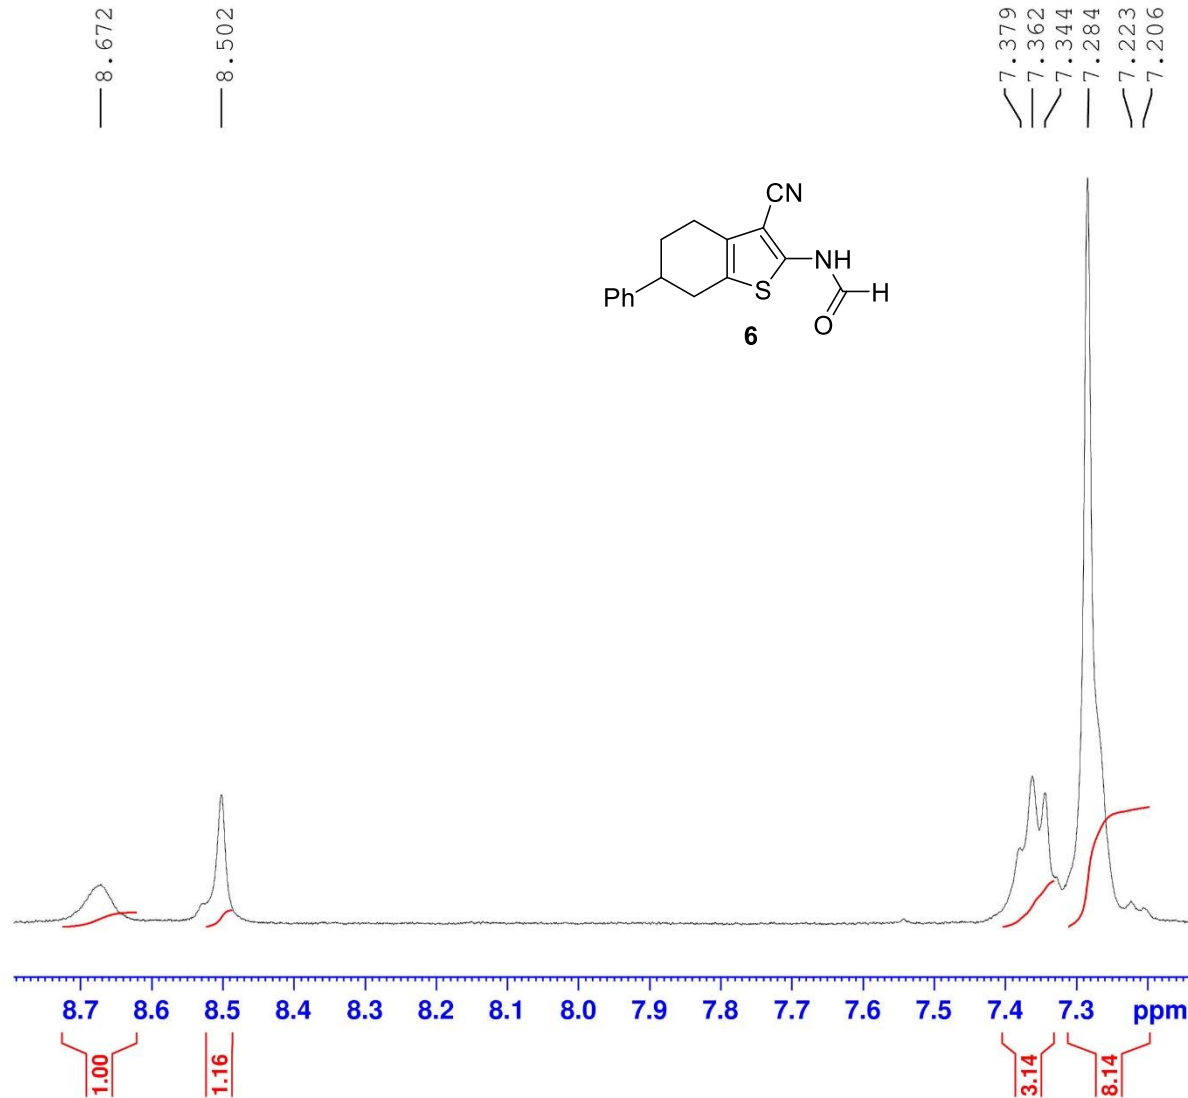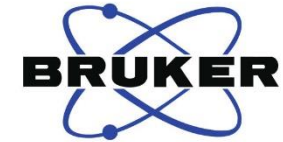

Current Data Parameters  
 NAME amna-shaaban-A5  
 EXPNO 2  
 PROCNO 1

F2 - Acquisition Parameters  
 Date\_ 20220912  
 Time\_ 12.21  
 INSTRUM spect  
 PROBHD 5 mm PABBO BB/  
 PULPROG zg30  
 TD 65536  
 SOLVENT CDCl3  
 NS 256  
 DS 2  
 SWH 8012.820 Hz  
 FIDRES 0.122266 Hz  
 AQ 4.0894465 sec  
 RG 205.37  
 DW 62.400 usec  
 DE 6.50 usec  
 TE 300.0 K  
 D1 1.00000000 sec  
 TD0 1

===== CHANNEL f1 =====  
 SFO1 400.1524711 MHz  
 NUC1 1H  
 P1 12.00 usec  
 PLW1 18.00000000 W

F2 - Processing parameters  
 SI 65536  
 SF 400.1500000 MHz  
 WDW EM  
 SSB 0  
 LB 0.30 Hz  
 GB 0  
 PC 1.00

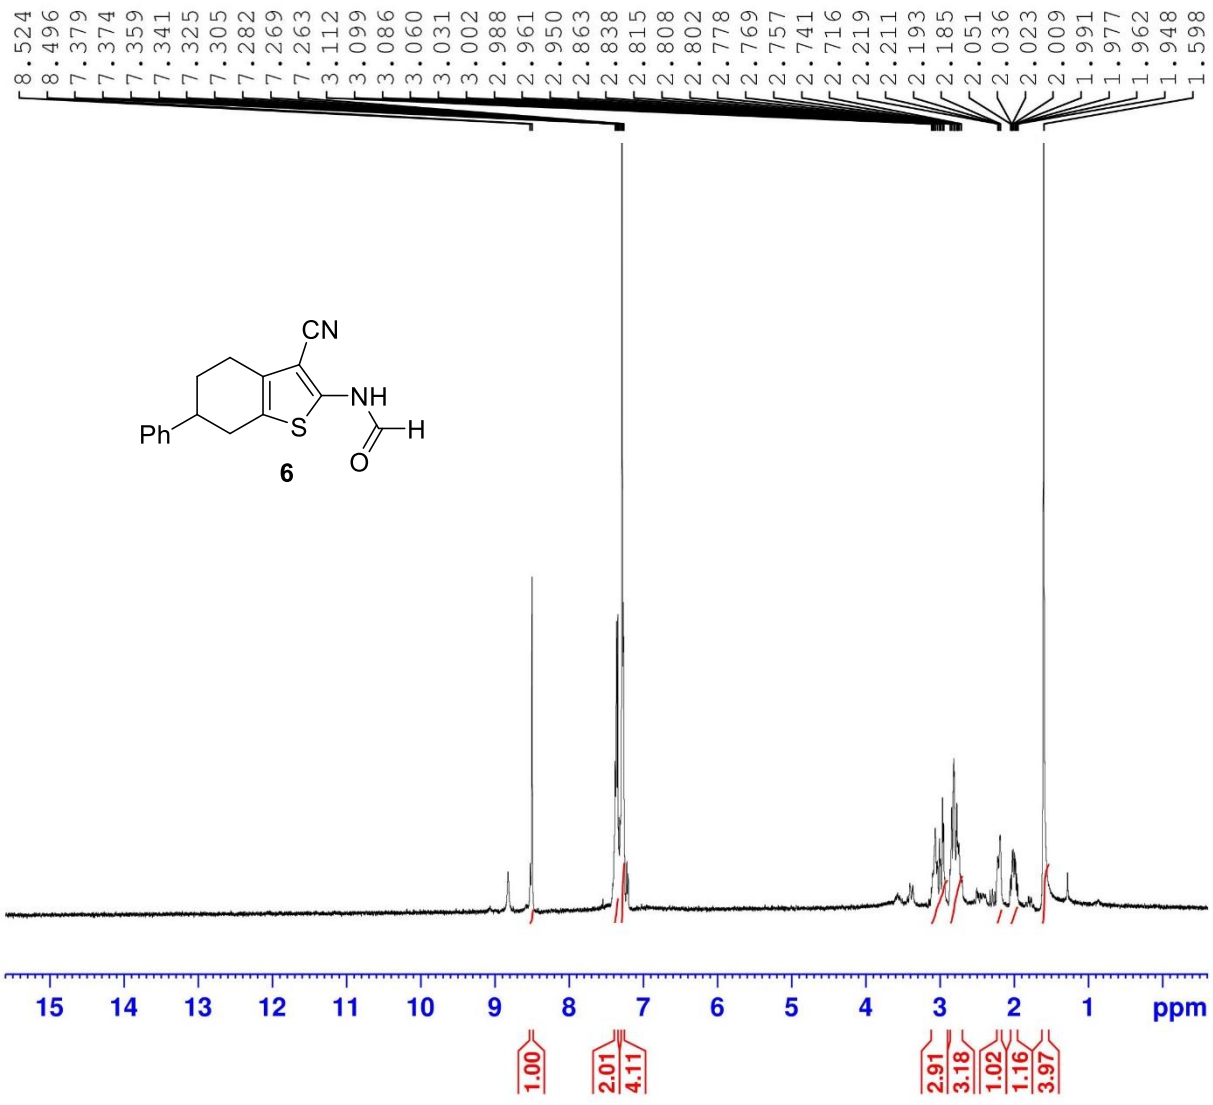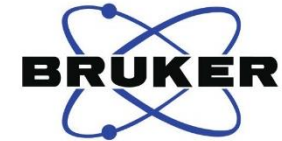

Current Data Parameters  
 NAME amna-shaabab-A5-d2o  
 EXPNO 1  
 PROCNO 1

F2 - Acquisition Parameters  
 Date\_ 20220921  
 Time\_ 9.04  
 INSTRUM spect  
 PROBHD 5 mm PABBO BB/  
 PULPROG zg30  
 TD 65536  
 SOLVENT CDCl3  
 NS 127  
 DS 2  
 SWH 8012.820 Hz  
 FIDRES 0.122266 Hz  
 AQ 4.0894465 sec  
 RG 205.37  
 DW 62.400 usec  
 DE 6.50 usec  
 TE 300.0 K  
 D1 1.00000000 sec  
 TD0 1

===== CHANNEL f1 =====  
 SFO1 400.1524711 MHz  
 NUC1 1H  
 P1 12.00 usec  
 PLW1 18.00000000 W

F2 - Processing parameters  
 SI 65536  
 SF 400.1500000 MHz  
 WDW EM  
 SSB 0  
 LB 0.30 Hz  
 GB 0  
 PC 1.00

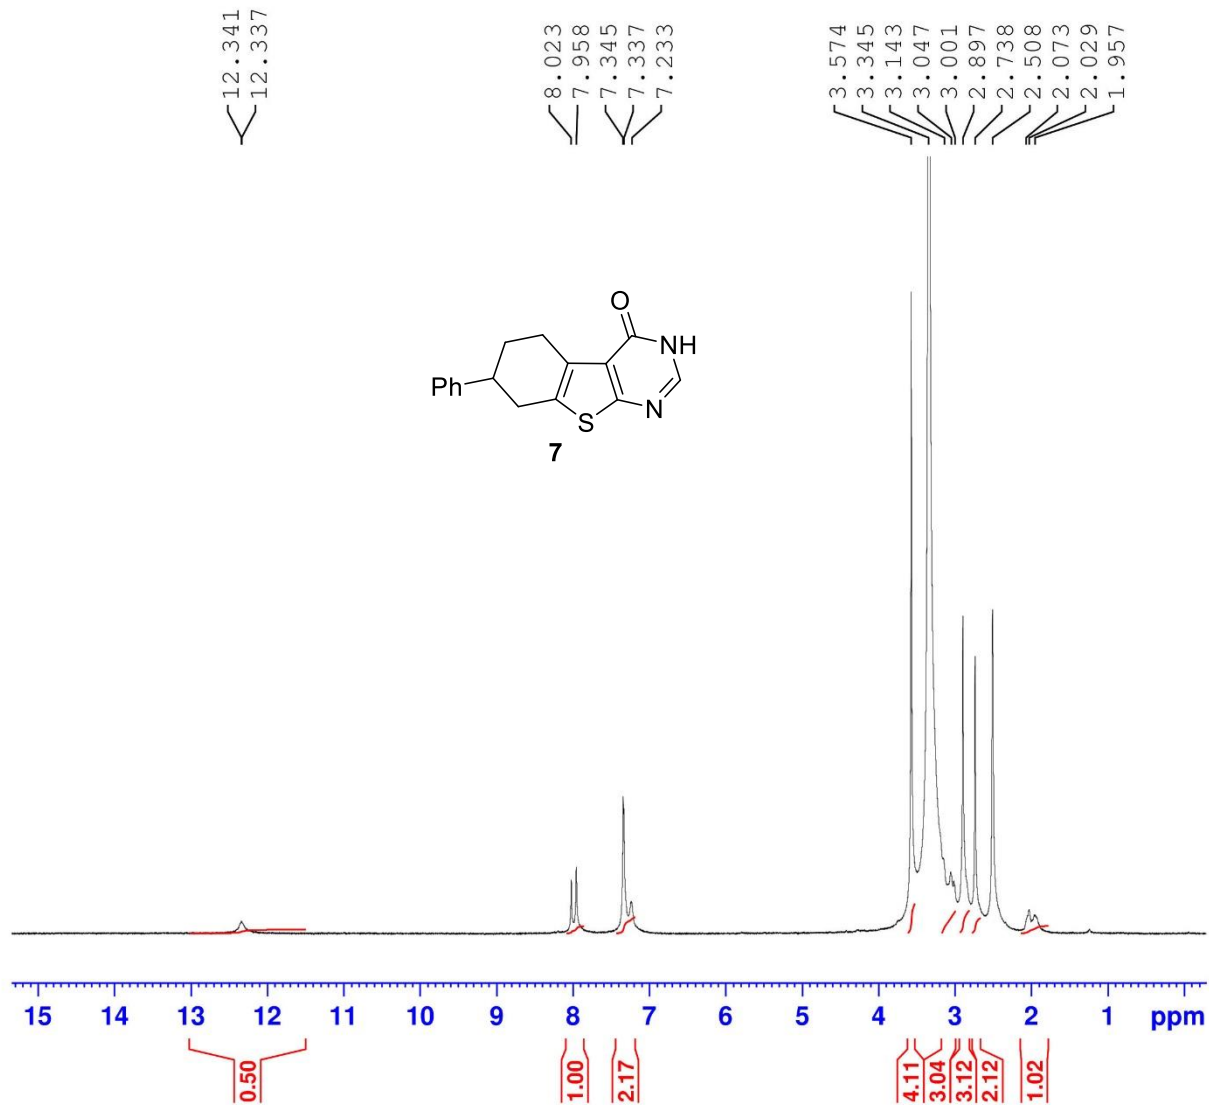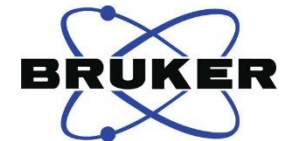

Current Data Parameters  
 NAME amna-shaaban-A6  
 EXPNO 1  
 PROCNO 1

F2 - Acquisition Parameters  
 Date\_ 20220913  
 Time\_ 12.58  
 INSTRUM spect  
 PROBHD 5 mm PABBO BB/  
 PULPROG zg30  
 TD 65536  
 SOLVENT DMSO  
 NS 128  
 DS 2  
 SWH 8012.820 Hz  
 FIDRES 0.122266 Hz  
 AQ 4.0894465 sec  
 RG 205.37  
 DW 62.400 usec  
 DE 6.50 usec  
 TE 300.0 K  
 D1 1.00000000 sec  
 TD0 1

===== CHANNEL f1 =====  
 SFO1 400.1524711 MHz  
 NUC1 1H  
 P1 12.00 usec  
 PLW1 18.00000000 W

F2 - Processing parameters  
 SI 65536  
 SF 400.1500000 MHz  
 WDW EM  
 SSB 0  
 LB 0.30 Hz  
 GB 0  
 PC 1.00

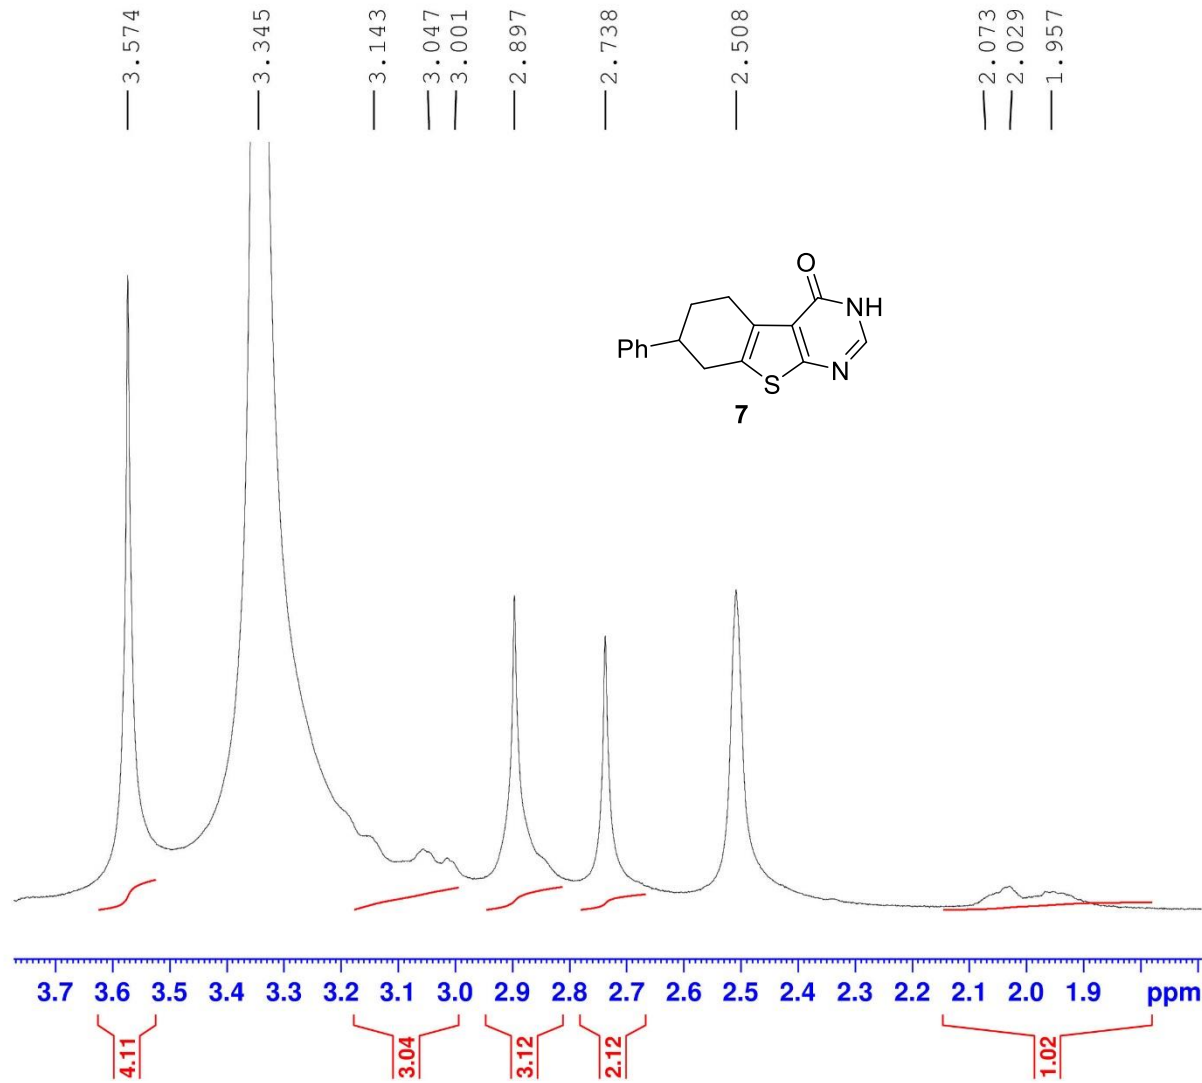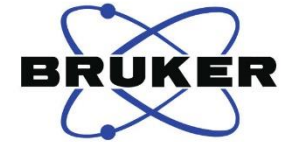

Current Data Parameters  
 NAME amna-shaaban-A6  
 EXPNO 1  
 PROCNO 1

F2 - Acquisition Parameters  
 Date\_ 20220913  
 Time\_ 12.58  
 INSTRUM spect  
 PROBHD 5 mm PABBO BB/  
 PULPROG zg30  
 TD 65536  
 SOLVENT DMSO  
 NS 128  
 DS 2  
 SWH 8012.820 Hz  
 FIDRES 0.122266 Hz  
 AQ 4.0894465 sec  
 RG 205.37  
 DW 62.400 usec  
 DE 6.50 usec  
 TE 300.0 K  
 D1 1.00000000 sec  
 TD0 1

===== CHANNEL f1 =====  
 SFO1 400.1524711 MHz  
 NUC1 1H  
 P1 12.00 usec  
 PLW1 18.00000000 W

F2 - Processing parameters  
 SI 65536  
 SF 400.1500000 MHz  
 WDW EM  
 SSB 0  
 LB 0.30 Hz  
 GB 0  
 PC 1.00

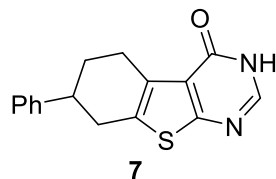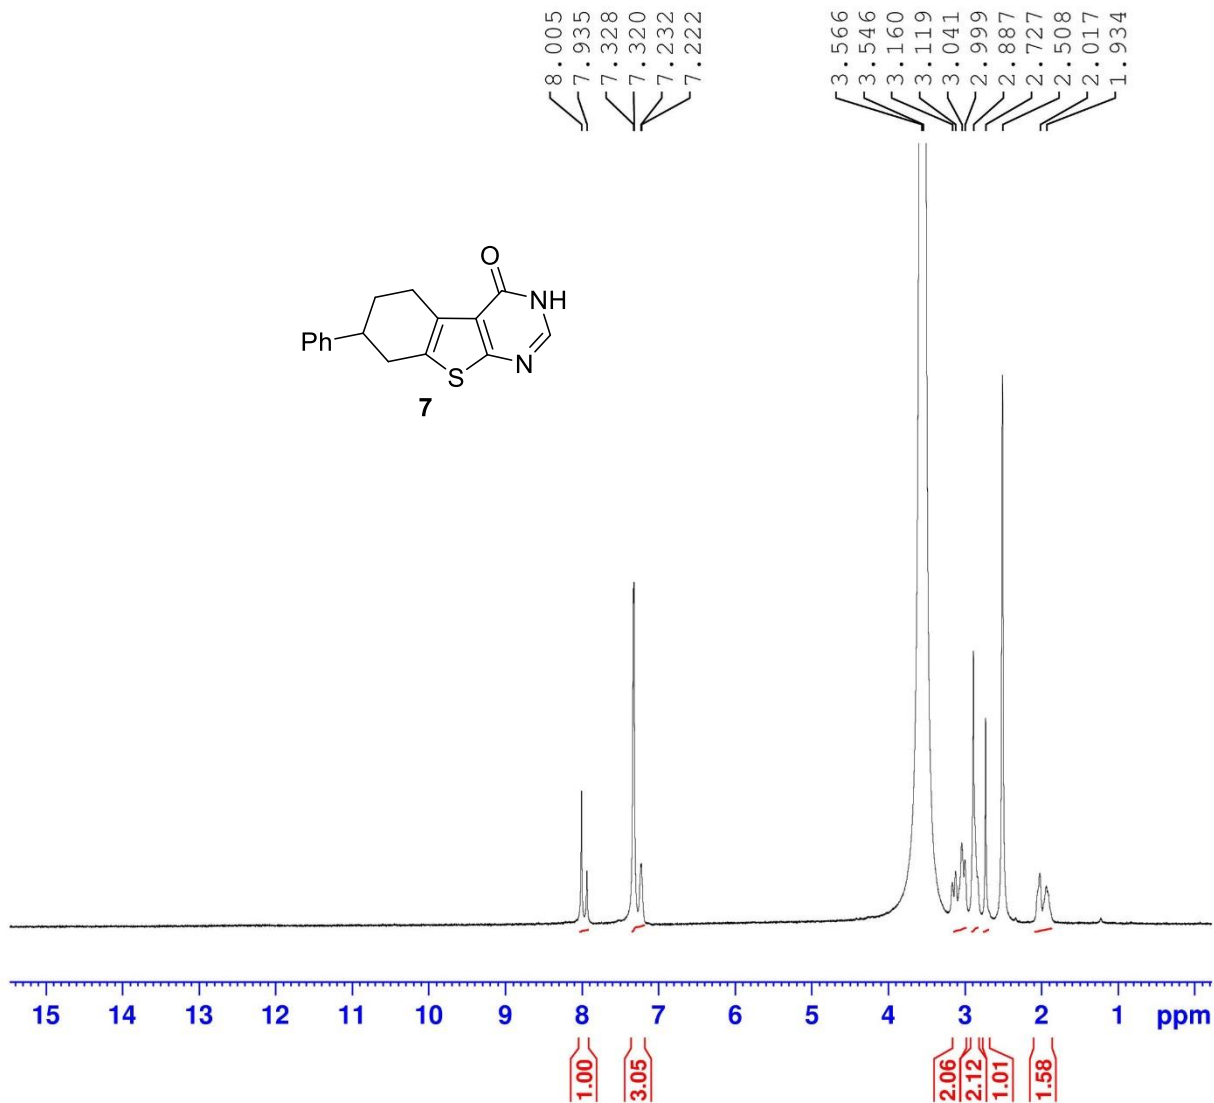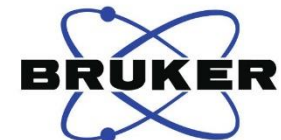

Current Data Parameters  
 NAME amna-shaabab-A6-d2o  
 EXPNO 1  
 PROCNO 1

F2 - Acquisition Parameters  
 Date\_ 20220920  
 Time\_ 10.27  
 INSTRUM spect  
 PROBHD 5 mm PABBO BB/  
 PULPROG zg30  
 TD 65536  
 SOLVENT DMSO  
 NS 128  
 DS 2  
 SWH 8012.820 Hz  
 FIDRES 0.122266 Hz  
 AQ 4.0894465 sec  
 RG 205.37  
 DW 62.400 usec  
 DE 6.50 usec  
 TE 300.0 K  
 D1 1.00000000 sec  
 TD0 1

===== CHANNEL f1 =====  
 SFO1 400.1524711 MHz  
 NUC1 1H  
 P1 12.00 usec  
 PLW1 18.00000000 W

F2 - Processing parameters  
 SI 65536  
 SF 400.1500000 MHz  
 WDW EM  
 SSB 0  
 LB 0.30 Hz  
 GB 0  
 PC 1.00



Analyst  
 Date

Administrator  
 02 م 01:18 2021, ديسمبر

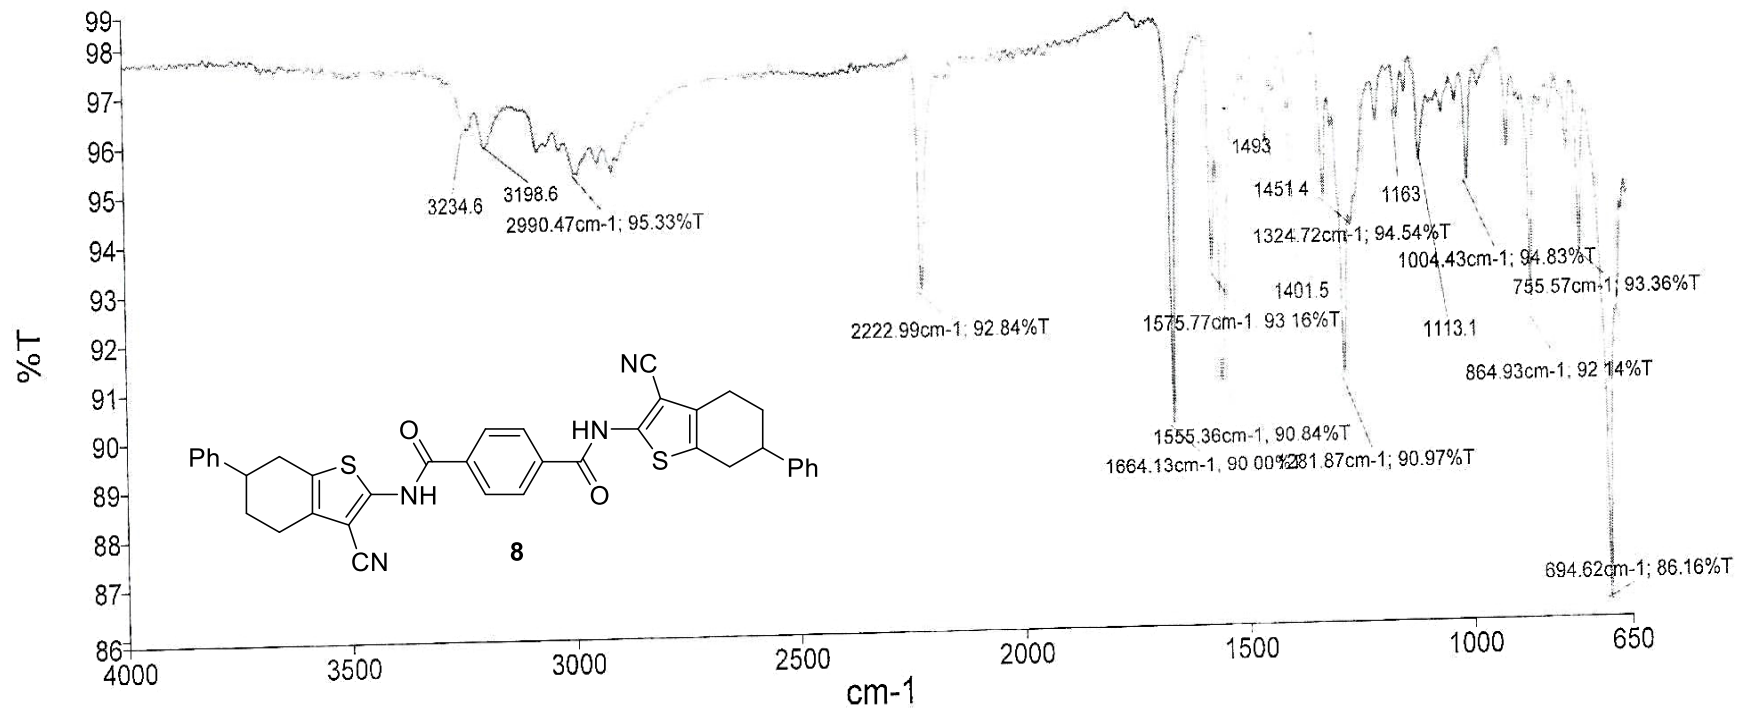

| Sample Name | Description                                              | Quality Checks                                                       |
|-------------|----------------------------------------------------------|----------------------------------------------------------------------|
| A7          | Sample 1388 By Administrator Date 2021 02 ديسمبر, الخميس | The Quality Checks give rise to a Weak Bands warning for the sample. |

11.971  
8.129  
8.117  
8.096  
8.068  
8.046  
7.434  
7.369  
7.345  
7.335  
7.313  
7.307  
7.299  
7.258  
7.249  
7.238  
7.228  
7.218  
3.418  
3.174  
3.112  
3.093  
3.081  
3.075  
3.063  
3.045  
2.980  
2.939  
2.808  
2.780  
2.705  
2.511  
2.507  
2.054  
1.996  
1.977  
1.969  
1.954  
1.232  
1.211  
1.193  
1.175

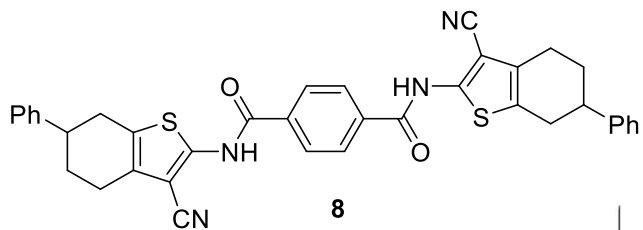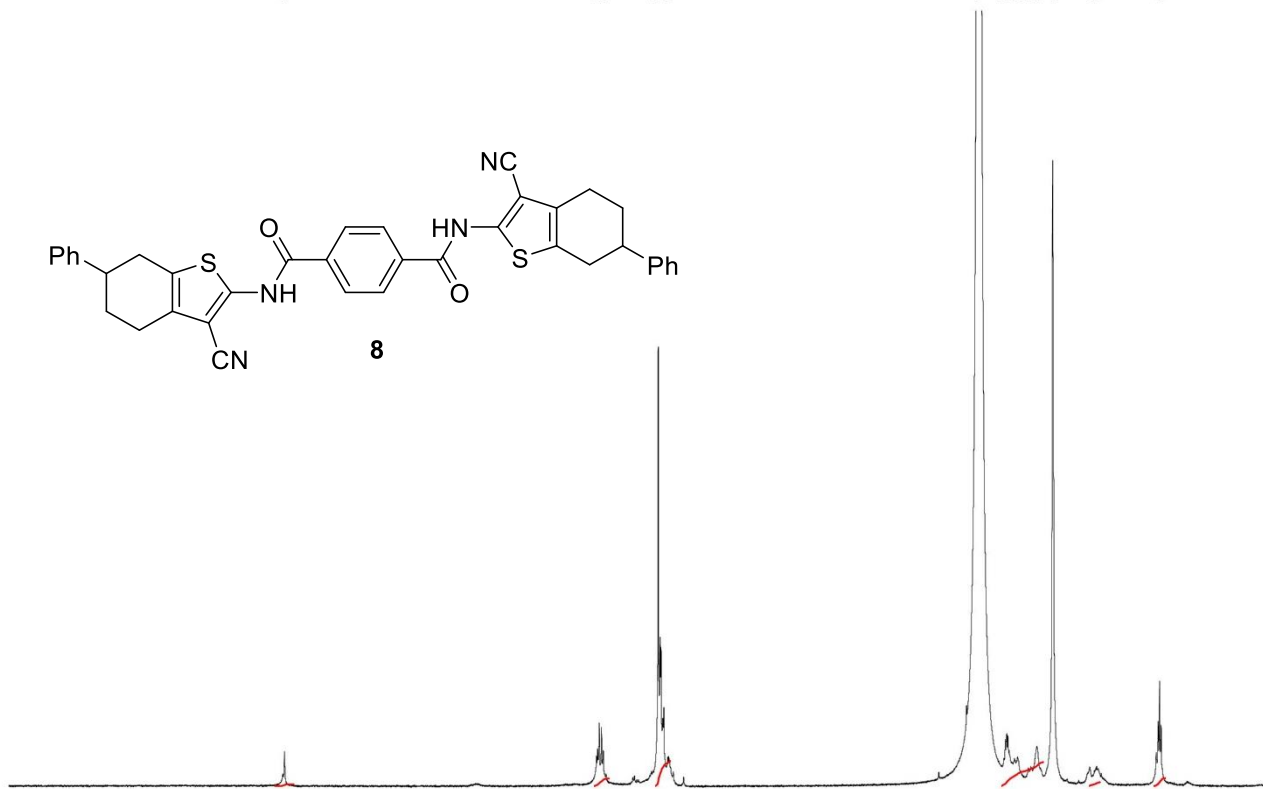

15 14 13 12 11 10 9 8 7 6 5 4 3 2 1 ppm

0.24  
1.00  
3.17  
3.05  
0.55  
1.01

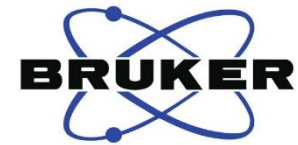

Current Data Parameters  
NAME amna-shaaban-A7  
EXPNO 1  
PROCNO 1

F2 - Acquisition Parameters  
Date\_ 20220913  
Time 12.39  
INSTRUM spect  
PROBHD 5 mm PABBO BB/  
PULPROG zg30  
TD 65536  
SOLVENT DMSO  
NS 128  
DS 2  
SWH 8012.820 Hz  
FIDRES 0.122266 Hz  
AQ 4.0894465 sec  
RG 205.37  
DW 62.400 usec  
DE 6.50 usec  
TE 300.0 K  
D1 1.00000000 sec  
TD0 1

===== CHANNEL f1 =====  
SFO1 400.1524711 MHz  
NUC1 1H  
P1 12.00 usec  
PLW1 18.00000000 W

F2 - Processing parameters  
SI 65536  
SF 400.1500000 MHz  
WDW EM  
SSB 0  
LB 0.30 Hz  
GB 0  
PC 1.00

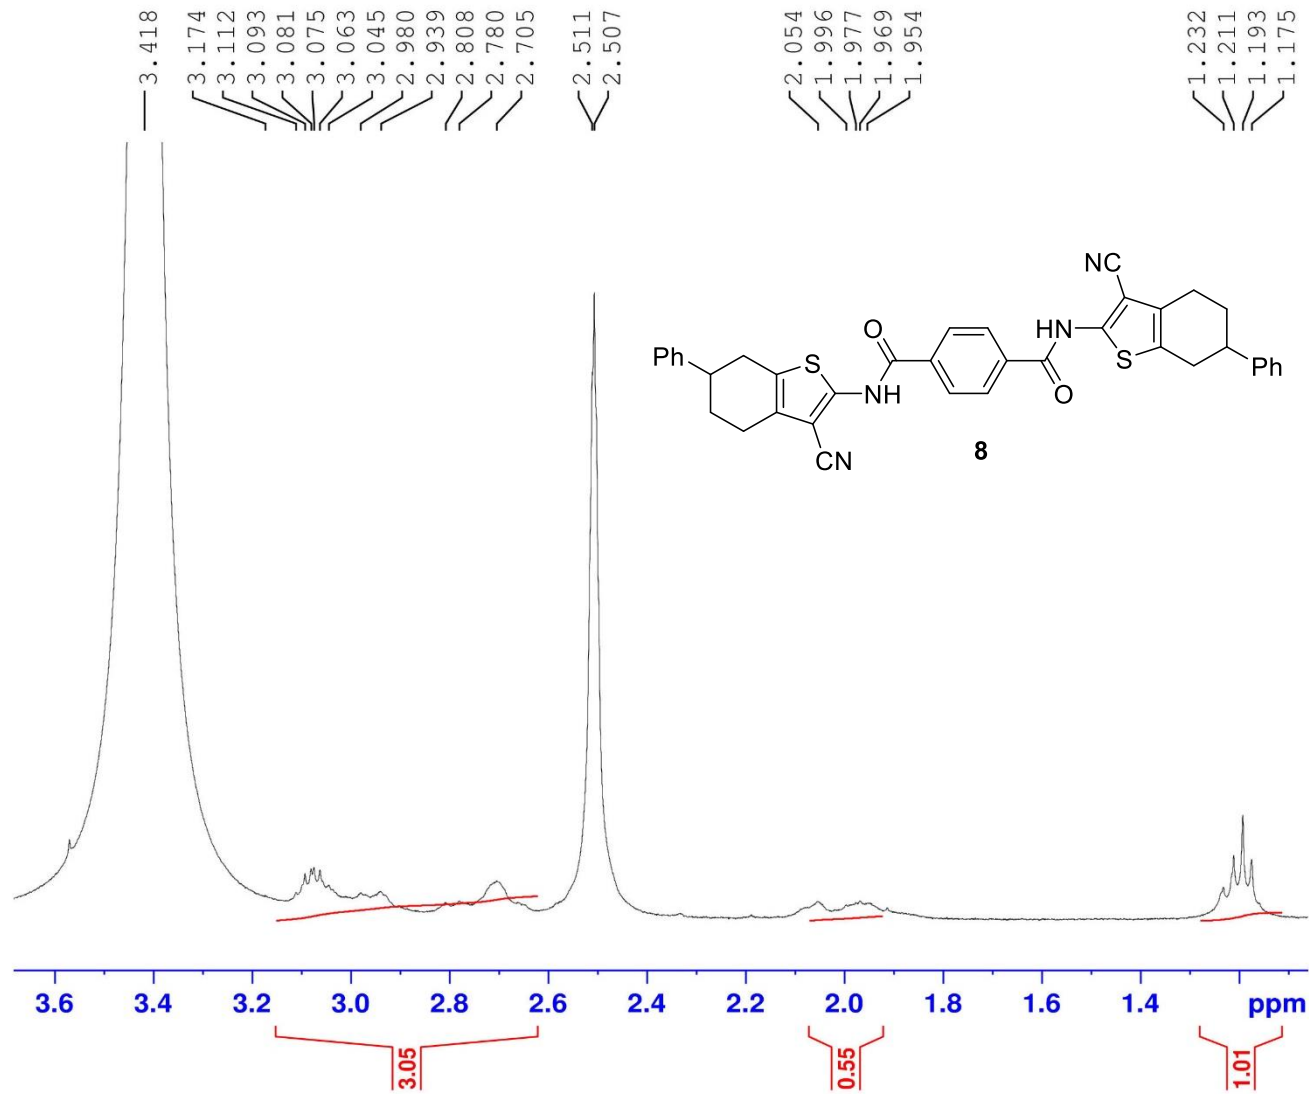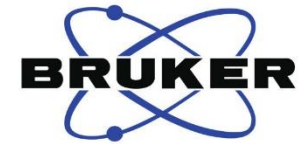

Current Data Parameters  
 NAME amna-shaaban-A7  
 EXPNO 1  
 PROCNO 1

F2 - Acquisition Parameters  
 Date\_ 20220913  
 Time 12.39  
 INSTRUM spect  
 PROBHD 5 mm PABBO BB/  
 PULPROG zg30  
 TD 65536  
 SOLVENT DMSO  
 NS 128  
 DS 2  
 SWH 8012.820 Hz  
 FIDRES 0.122266 Hz  
 AQ 4.0894465 sec  
 RG 205.37  
 DW 62.400 usec  
 DE 6.50 usec  
 TE 300.0 K  
 D1 1.0000000 sec  
 TD0 1

===== CHANNEL f1 =====  
 SFO1 400.1524711 MHz  
 NUC1 1H  
 P1 12.00 usec  
 PLW1 18.00000000 W

F2 - Processing parameters  
 SI 65536  
 SF 400.1500000 MHz  
 WDW EM  
 SSB 0  
 LB 0.30 Hz  
 GB 0  
 PC 1.00

8.129  
8.117  
8.096  
8.068  
8.046

7.434  
7.369  
7.345  
7.335  
7.313  
7.307  
7.299  
7.258  
7.249  
7.238  
7.228  
7.218

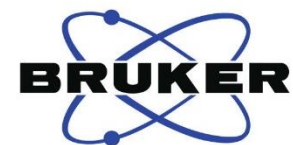

Current Data Parameters  
NAME amna-shaabab-A7  
EXPNO 1  
PROCNO 1

F2 - Acquisition Parameters  
Date\_ 20220913  
Time 12.39  
INSTRUM spect  
PROBHD 5 mm PABBO BB/  
PULPROG zg30  
TD 65536  
SOLVENT DMSO  
NS 128  
DS 2  
SWH 8012.820 Hz  
FIDRES 0.122266 Hz  
AQ 4.0894465 sec  
RG 205.37  
DW 62.400 usec  
DE 6.50 usec  
TE 300.0 K  
D1 1.00000000 sec  
TDO 1

==== CHANNEL f1 =====  
SFO1 400.1524711 MHz  
NUC1 1H  
P1 12.00 usec  
PLW1 18.00000000 W

F2 - Processing parameters  
SI 65536  
SF 400.1500000 MHz  
WDW EM  
SSB 0  
LB 0.30 Hz  
GB 0  
PC 1.00

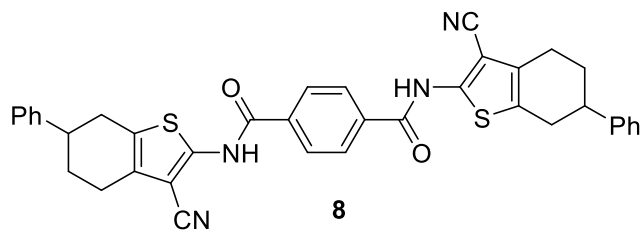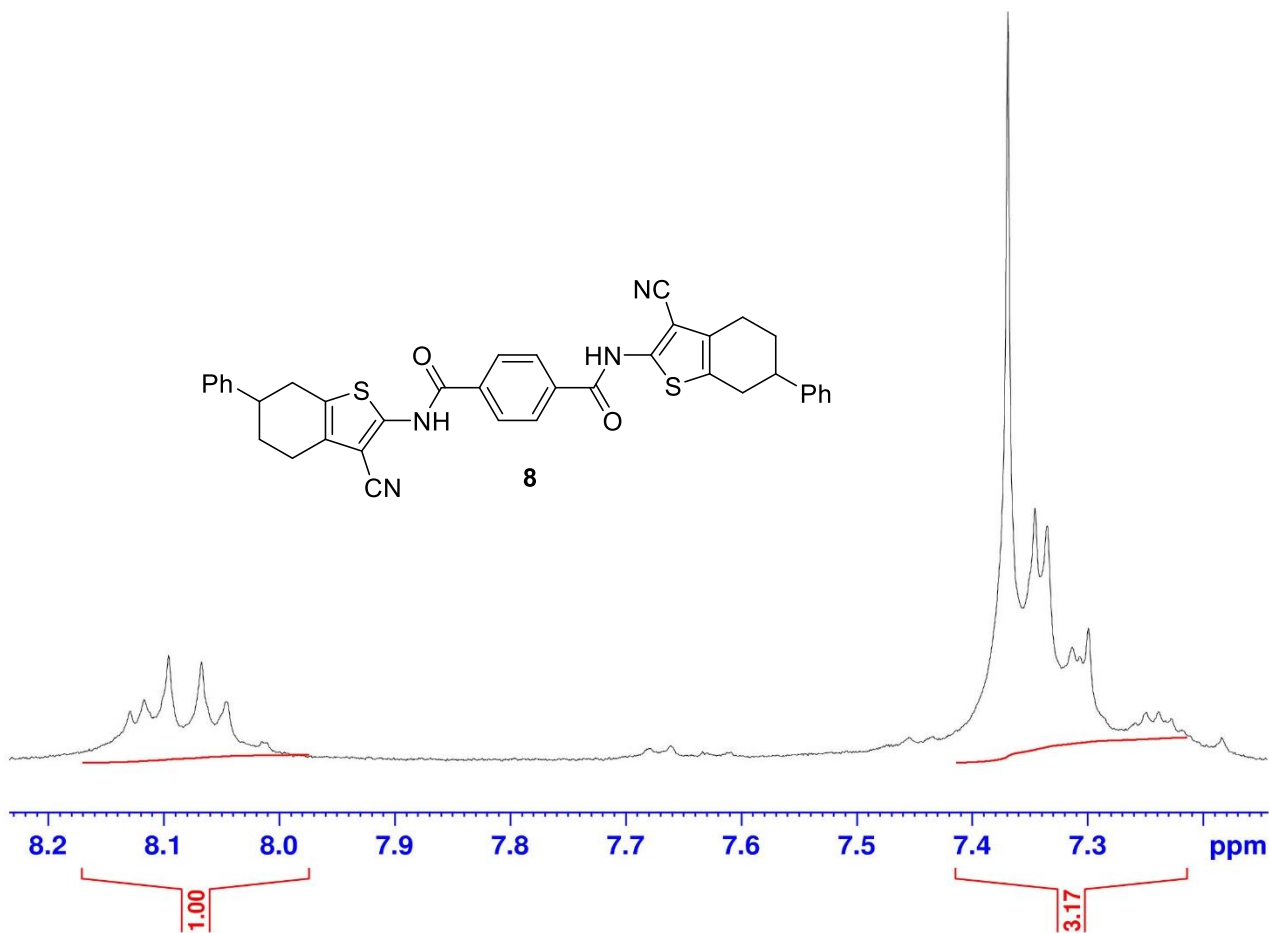

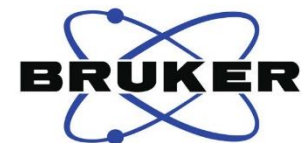

Current Data Parameters  
NAME amna-shaabab-A7-d2o  
EXPNO 1  
PROCNO 1

F2 - Acquisition Parameters  
Date\_ 20220920  
Time 12.25  
INSTRUM spect  
PROBHD 5 mm PABBO BB/  
PULPROG zg30  
TD 65536  
SOLVENT DMSO  
NS 58  
DS 2  
SWH 8012.820 Hz  
FIDRES 0.122266 Hz  
AQ 4.0894465 sec  
RG 164.32  
DW 62.400 usec  
DE 6.50 usec  
TE 300.0 K  
D1 1.00000000 sec  
TDO 1

==== CHANNEL f1 =====  
SF01 400.1524711 MHz  
NUC1 1H  
P1 12.00 usec  
PLW1 18.00000000 W

F2 - Processing parameters  
SI 65536  
SF 400.1500000 MHz  
WDW EM  
SSB 0  
LB 0.30 Hz  
GB 0  
PC 1.00

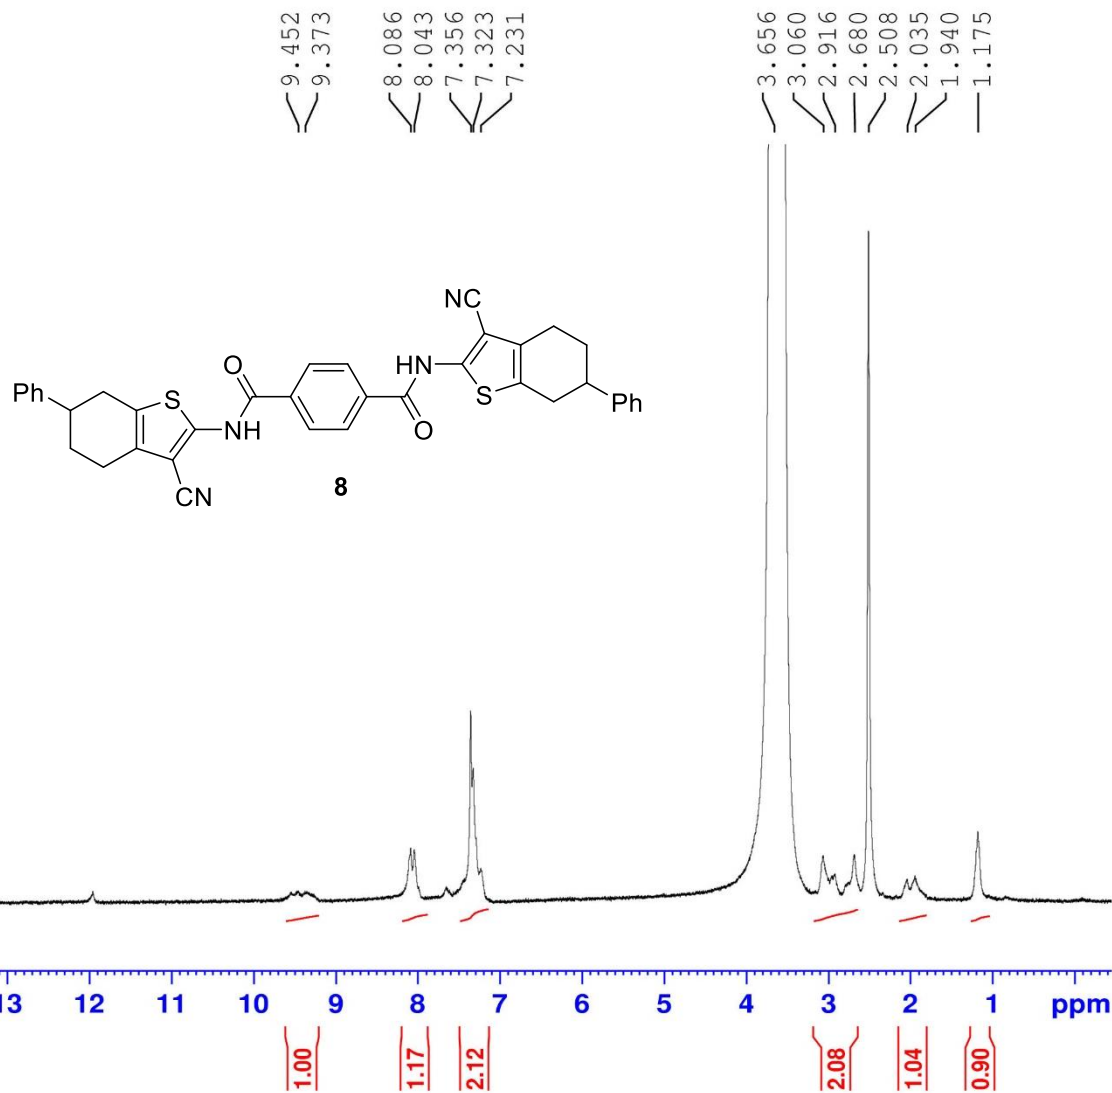

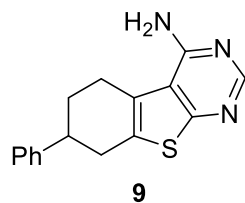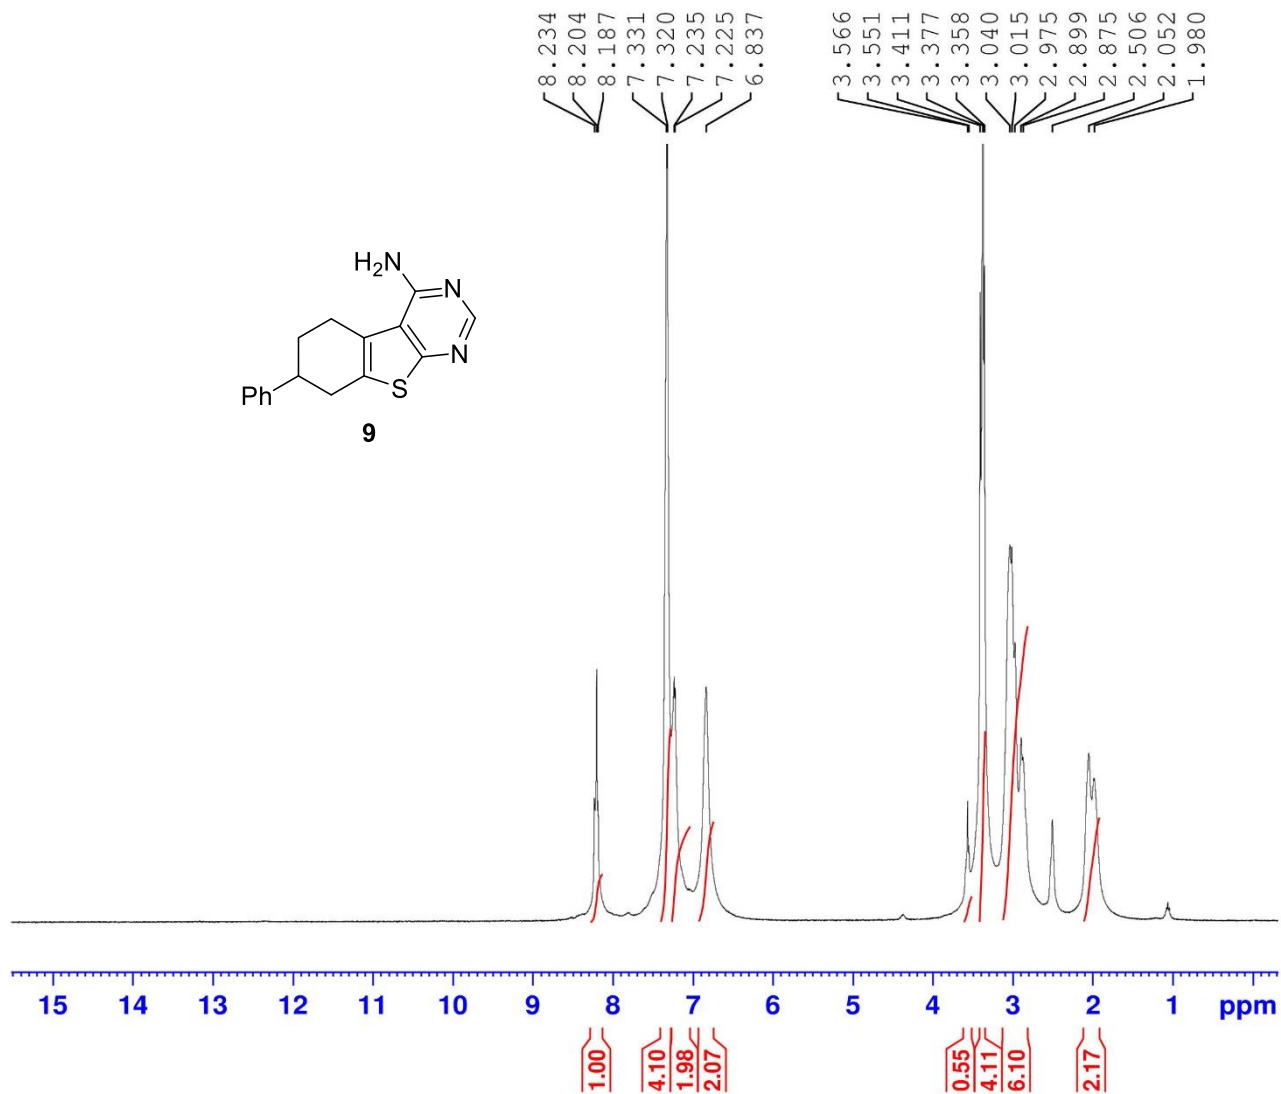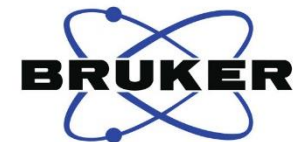

Current Data Parameters  
 NAME amna-shaaban-A3  
 EXPNO 1  
 PROCNO 1

F2 - Acquisition Parameters  
 Date\_ 20220913  
 Time 11.15  
 INSTRUM spect  
 PROBHD 5 mm PABBO BB/  
 PULPROG zg30  
 TD 65536  
 SOLVENT DMSO  
 NS 65  
 DS 2  
 SWH 8012.820 Hz  
 FIDRES 0.122266 Hz  
 AQ 4.0894465 sec  
 RG 205.37  
 DW 62.400 usec  
 DE 6.50 usec  
 TE 300.0 K  
 D1 1.00000000 sec  
 TD0 1

==== CHANNEL f1 =====  
 SFO1 400.1524711 MHz  
 NUC1 1H  
 P1 12.00 usec  
 PLW1 18.00000000 W

F2 - Processing parameters  
 SI 65536  
 SF 400.1500000 MHz  
 WDW EM  
 SSB 0  
 LB 0.30 Hz  
 GB 0  
 PC 1.00

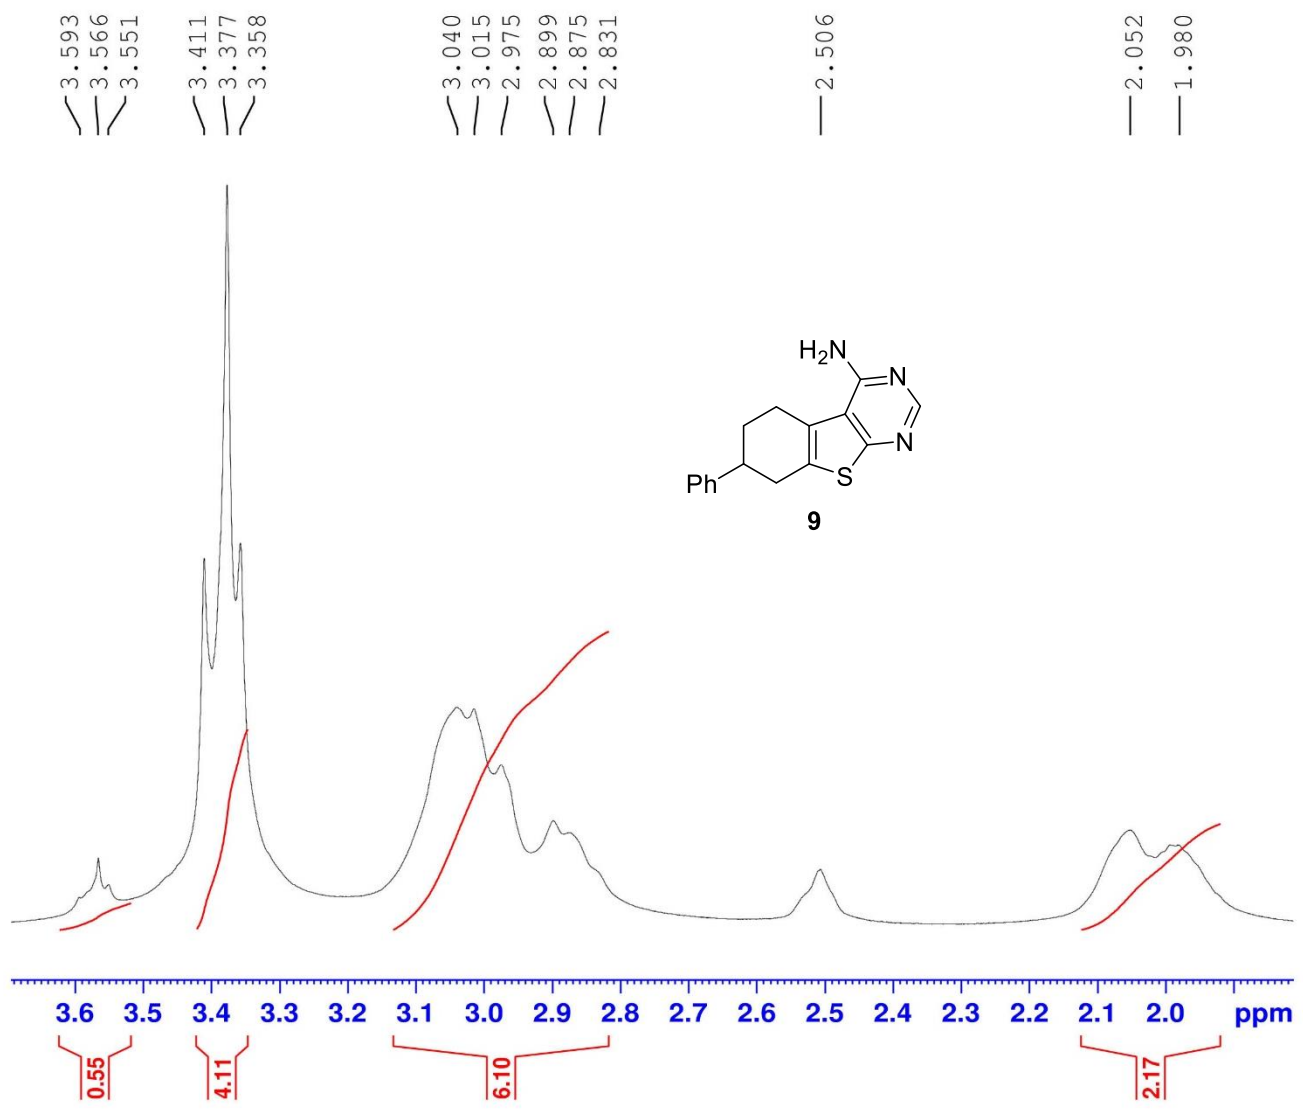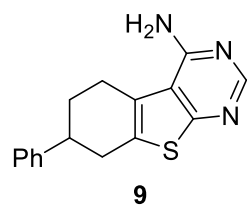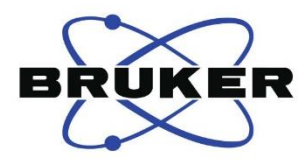

Current Data Parameters  
 NAME amna-shaaban-A3  
 EXPNO 1  
 PROCNO 1

F2 - Acquisition Parameters  
 Date\_ 20220913  
 Time 11.15  
 INSTRUM spect  
 PROBHD 5 mm PABBO BB/  
 PULPROG zg30  
 TD 65536  
 SOLVENT DMSO  
 NS 65  
 DS 2  
 SWH 8012.820 Hz  
 FIDRES 0.122266 Hz  
 AQ 4.0894465 sec  
 RG 205.37  
 DW 62.400 usec  
 DE 6.50 usec  
 TE 300.0 K  
 D1 1.00000000 sec  
 TD0 1

===== CHANNEL f1 =====  
 SFO1 400.1524711 MHz  
 NUC1 1H  
 P1 12.00 usec  
 PLW1 18.00000000 W

F2 - Processing parameters  
 SI 65536  
 SF 400.1500000 MHz  
 WDW EM  
 SSB 0  
 LB 0.30 Hz  
 GB 0  
 PC 1.00

8.234  
8.204  
8.187

7.331  
7.320  
7.235  
7.225

6.837

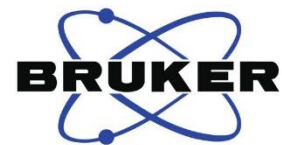

Current Data Parameters  
NAME amna-shaabab-A3  
EXPNO 1  
PROCNO 1

F2 - Acquisition Parameters  
Date\_ 20220913  
Time 11.15  
INSTRUM spect  
PROBHD 5 mm PABBO BB/  
PULPROG zg30  
TD 65536  
SOLVENT DMSO  
NS 65  
DS 2  
SWH 8012.820 Hz  
FIDRES 0.122266 Hz  
AQ 4.0894465 sec  
RG 205.37  
DW 62.400 usec  
DE 6.50 usec  
TE 300.0 K  
D1 1.00000000 sec  
TD0 1

==== CHANNEL f1 =====  
SF01 400.1524711 MHz  
NUC1 1H  
P1 12.00 usec  
PLW1 18.00000000 W

F2 - Processing parameters  
SI 65536  
SF 400.1500000 MHz  
WDW EM  
SSB 0  
LB 0.30 Hz  
GB 0  
PC 1.00

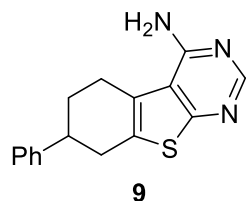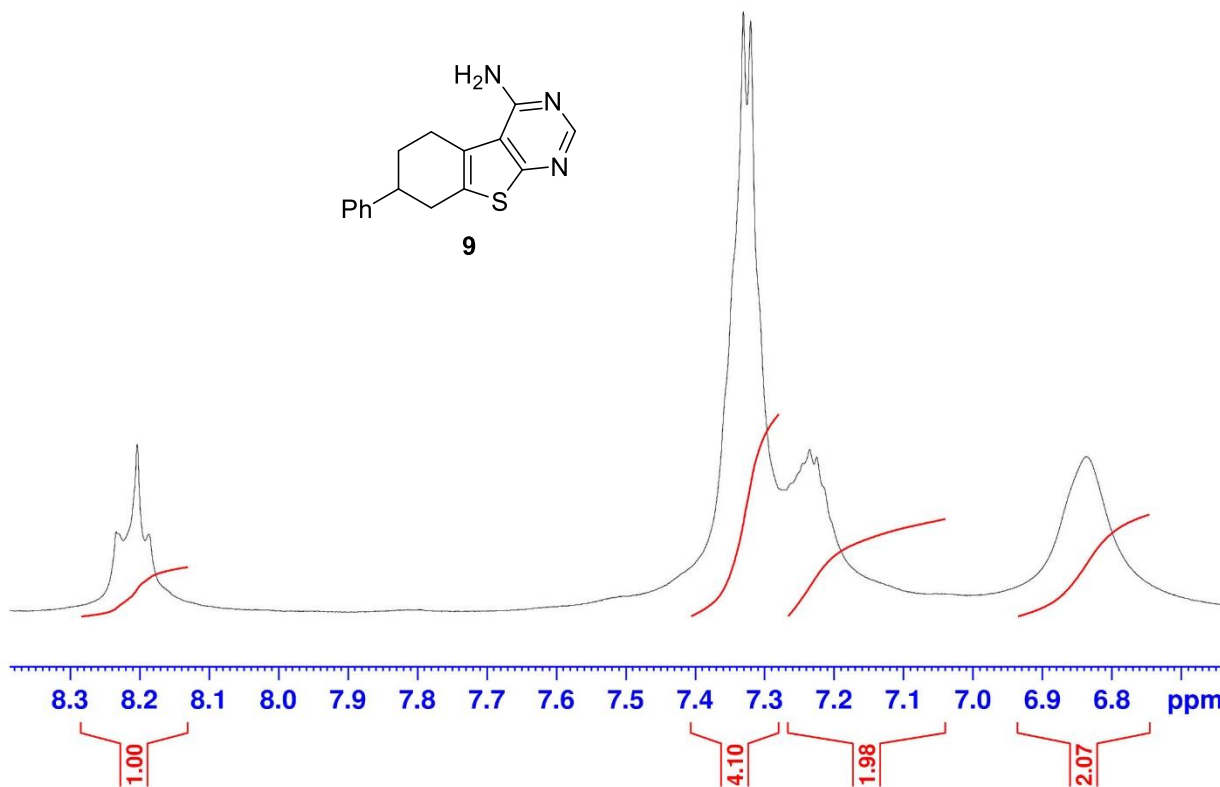



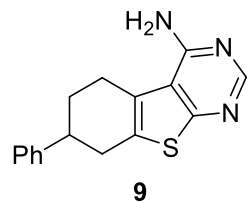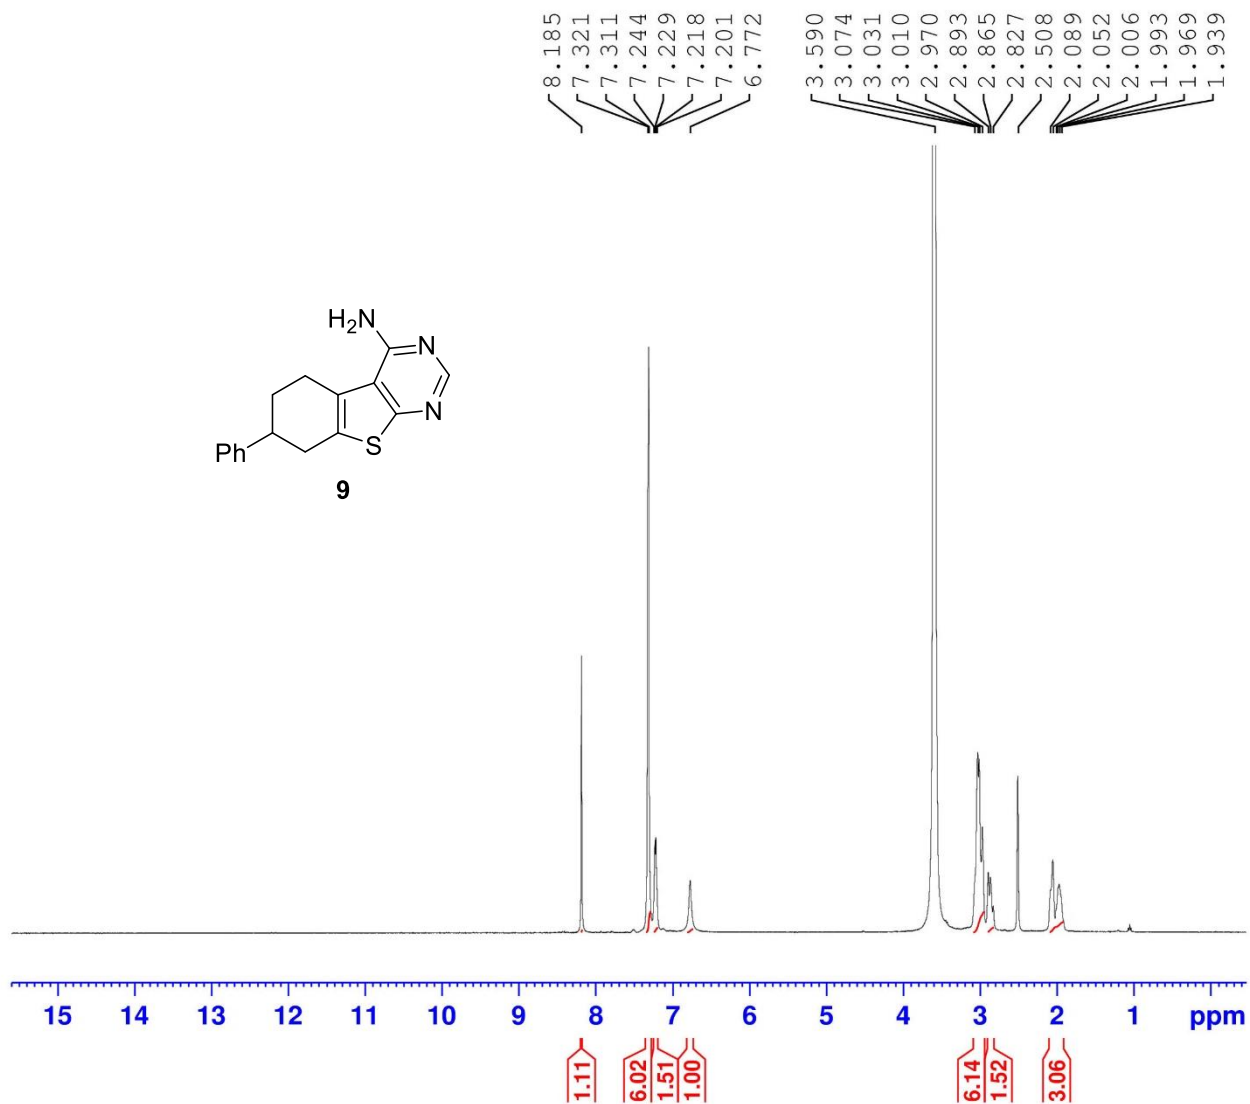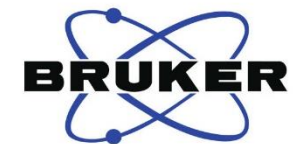

Current Data Parameters  
 NAME amna-shaabab-A3-d2o  
 EXPNO 3  
 PROCNO 1

F2 - Acquisition Parameters  
 Date\_ 20220920  
 Time 9.49  
 INSTRUM spect  
 PROBHD 5 mm PABBO BB/  
 PULPROG zg30  
 TD 65536  
 SOLVENT DMSO  
 NS 43  
 DS 2  
 SWH 8012.820 Hz  
 FIDRES 0.122266 Hz  
 AQ 4.0894465 sec  
 RG 205.37  
 DW 62.400 usec  
 DE 6.50 usec  
 TE 300.0 K  
 D1 1.0000000 sec  
 TD0 1

===== CHANNEL f1 =====  
 SFO1 400.1524711 MHz  
 NUC1 1H  
 P1 12.00 usec  
 PLW1 18.00000000 W

F2 - Processing parameters  
 SI 65536  
 SF 400.1500000 MHz  
 WDW EM  
 SSB 0  
 LB 0.30 Hz  
 GB 0  
 PC 1.00

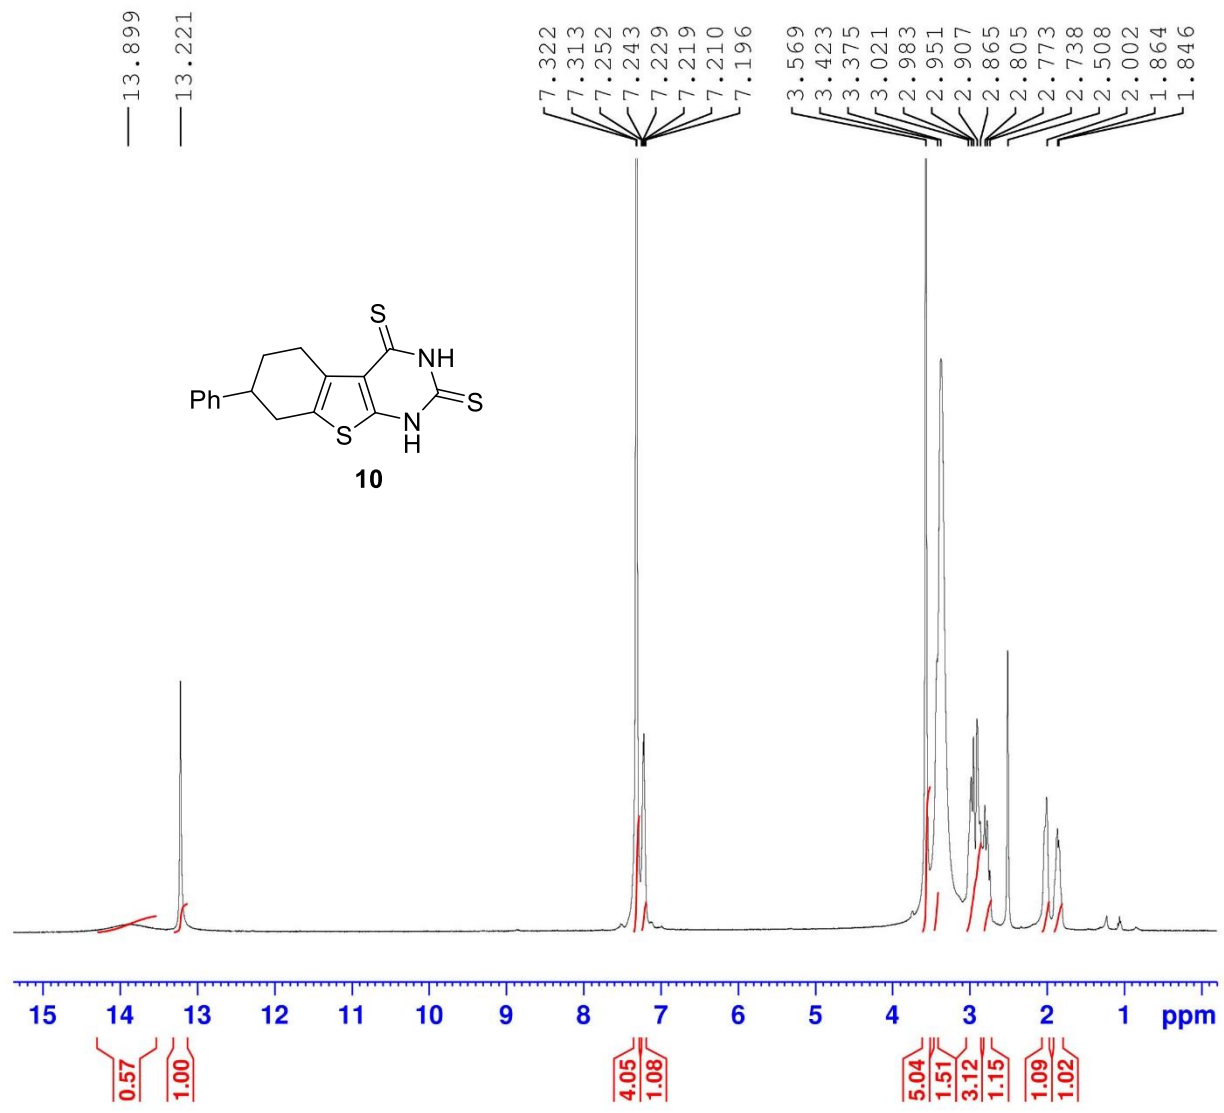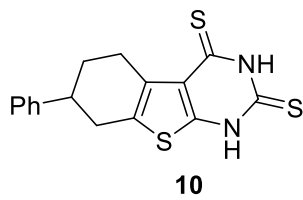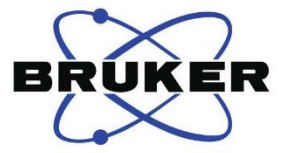

Current Data Parameters  
 NAME amna-shaaban-1A13  
 EXPNO 1  
 PROCNO 1

F2 - Acquisition Parameters  
 Date\_ 20220913  
 Time\_ 10.45  
 INSTRUM spect  
 PROBHD 5 mm PABBO BB/  
 PULPROG zg30  
 TD 65536  
 SOLVENT DMSO  
 NS 128  
 DS 2  
 SWH 8012.820 Hz  
 FIDRES 0.122266 Hz  
 AQ 4.0894465 sec  
 RG 205.37  
 DW 62.400 usec  
 DE 6.50 usec  
 TE 300.0 K  
 D1 1.00000000 sec  
 TD0 1

==== CHANNEL f1 =====  
 SFO1 400.1524711 MHz  
 NUC1 1H  
 P1 12.00 usec  
 PLW1 18.00000000 W

F2 - Processing parameters  
 SI 65536  
 SF 400.1500000 MHz  
 WDW EM  
 SSB 0  
 LB 0.30 Hz  
 GB 0  
 PC 1.00

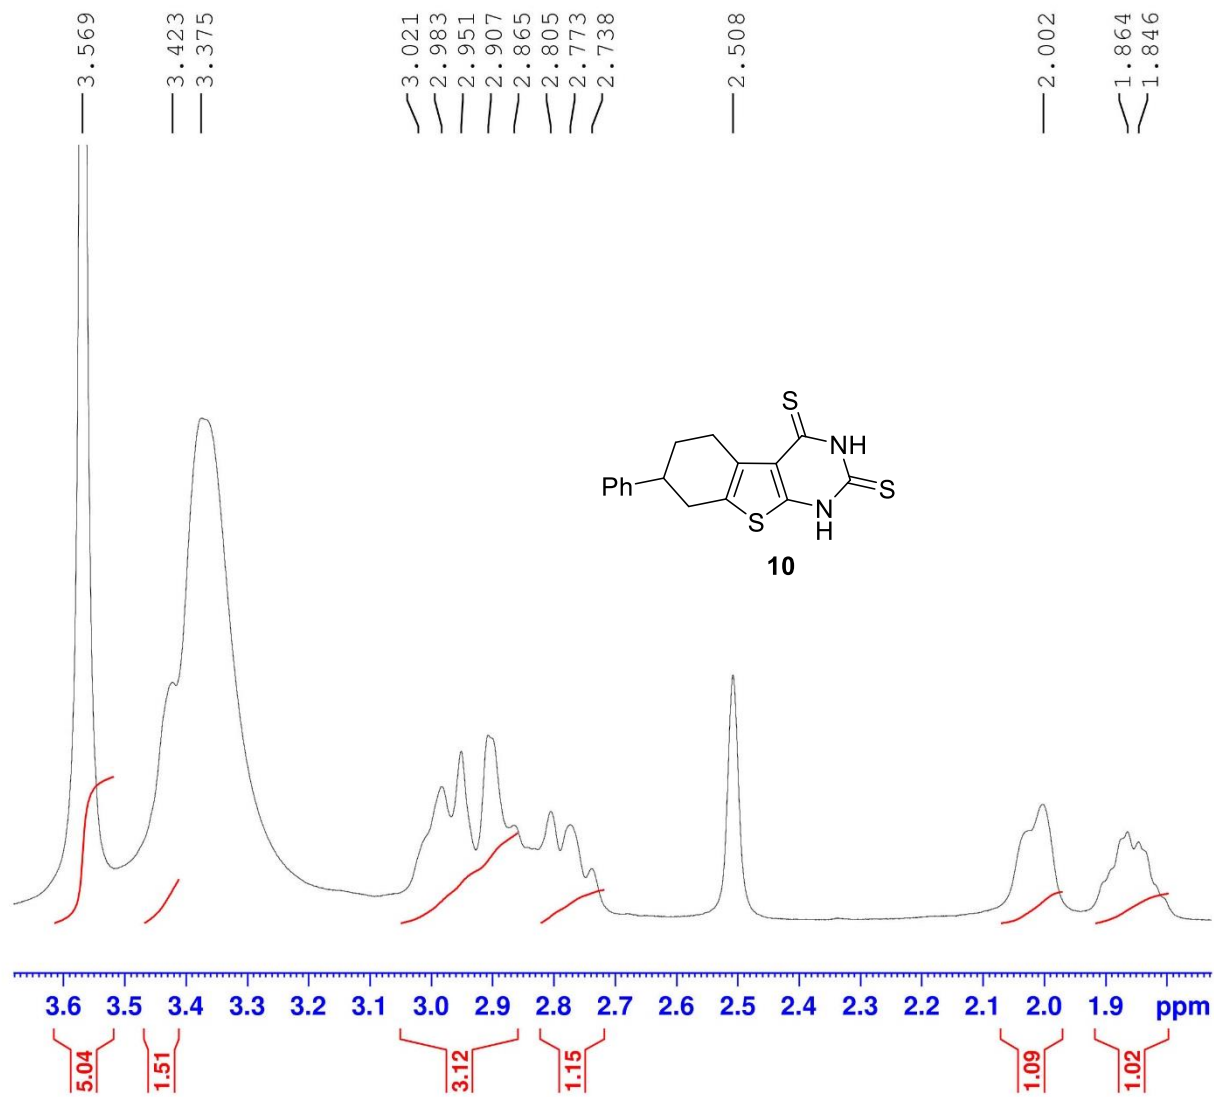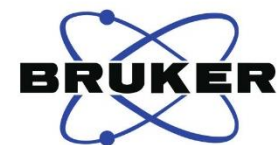

Current Data Parameters  
 NAME amna-shaabab-1A13  
 EXPNO 1  
 PROCNO 1

F2 - Acquisition Parameters  
 Date\_ 20220913  
 Time 10.45  
 INSTRUM spect  
 PROBHD 5 mm PABBO BB/  
 PULPROG zg30  
 TD 65536  
 SOLVENT DMSO  
 NS 128  
 DS 2  
 SWH 8012.820 Hz  
 FIDRES 0.122266 Hz  
 AQ 4.0894465 sec  
 RG 205.37  
 DW 62.400 usec  
 DE 6.50 usec  
 TE 300.0 K  
 D1 1.00000000 sec  
 TD0 1

===== CHANNEL f1 =====  
 SF01 400.1524711 MHz  
 NUC1 1H  
 P1 12.00 usec  
 PLW1 18.00000000 W

F2 - Processing parameters  
 SI 65536  
 SF 400.1500000 MHz  
 WDW EM  
 SSB 0  
 LB 0.30 Hz  
 GB 0  
 PC 1.00

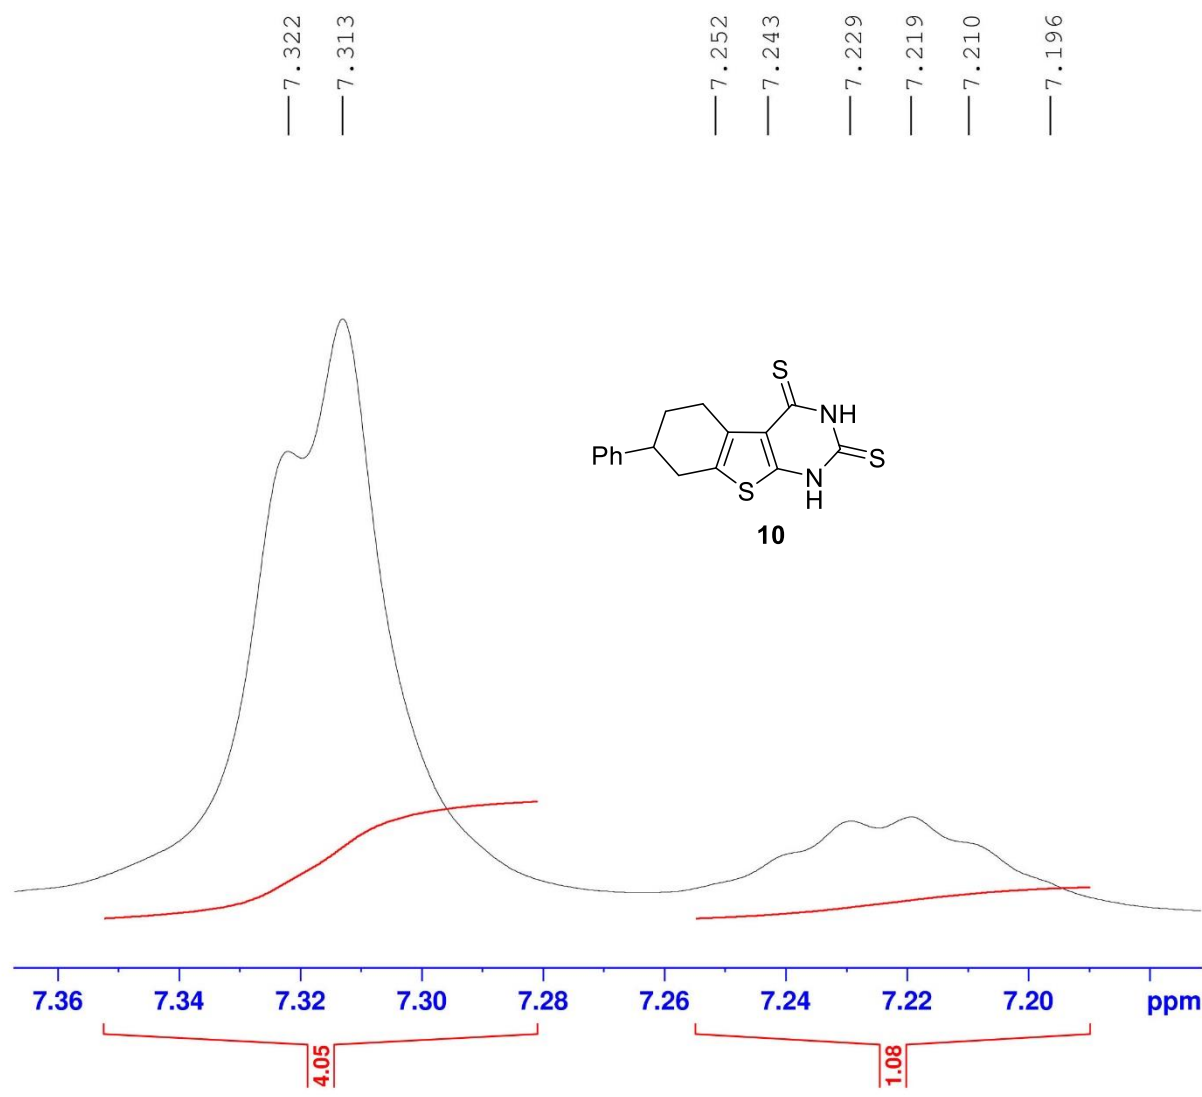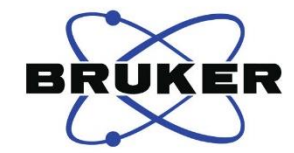

Current Data Parameters  
 NAME amna-shaaban-1A13  
 EXPNO 1  
 PROCNO 1

F2 - Acquisition Parameters  
 Date\_ 20220913  
 Time 10.45  
 INSTRUM spect  
 PROBHD 5 mm PABBO BB/  
 PULPROG zg30  
 TD 65536  
 SOLVENT DMSO  
 NS 128  
 DS 2  
 SWH 8012.820 Hz  
 FIDRES 0.122266 Hz  
 AQ 4.0894465 sec  
 RG 205.37  
 DW 62.400 usec  
 DE 6.50 usec  
 TE 300.0 K  
 D1 1.00000000 sec  
 TD0 1

==== CHANNEL f1 =====  
 SF01 400.1524711 MHz  
 NUC1 1H  
 P1 12.00 usec  
 PLW1 18.00000000 W

F2 - Processing parameters  
 SI 65536  
 SF 400.1500000 MHz  
 WDW EM  
 SSB 0  
 LB 0.30 Hz  
 GB 0  
 PC 1.00

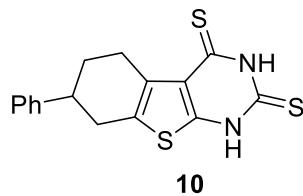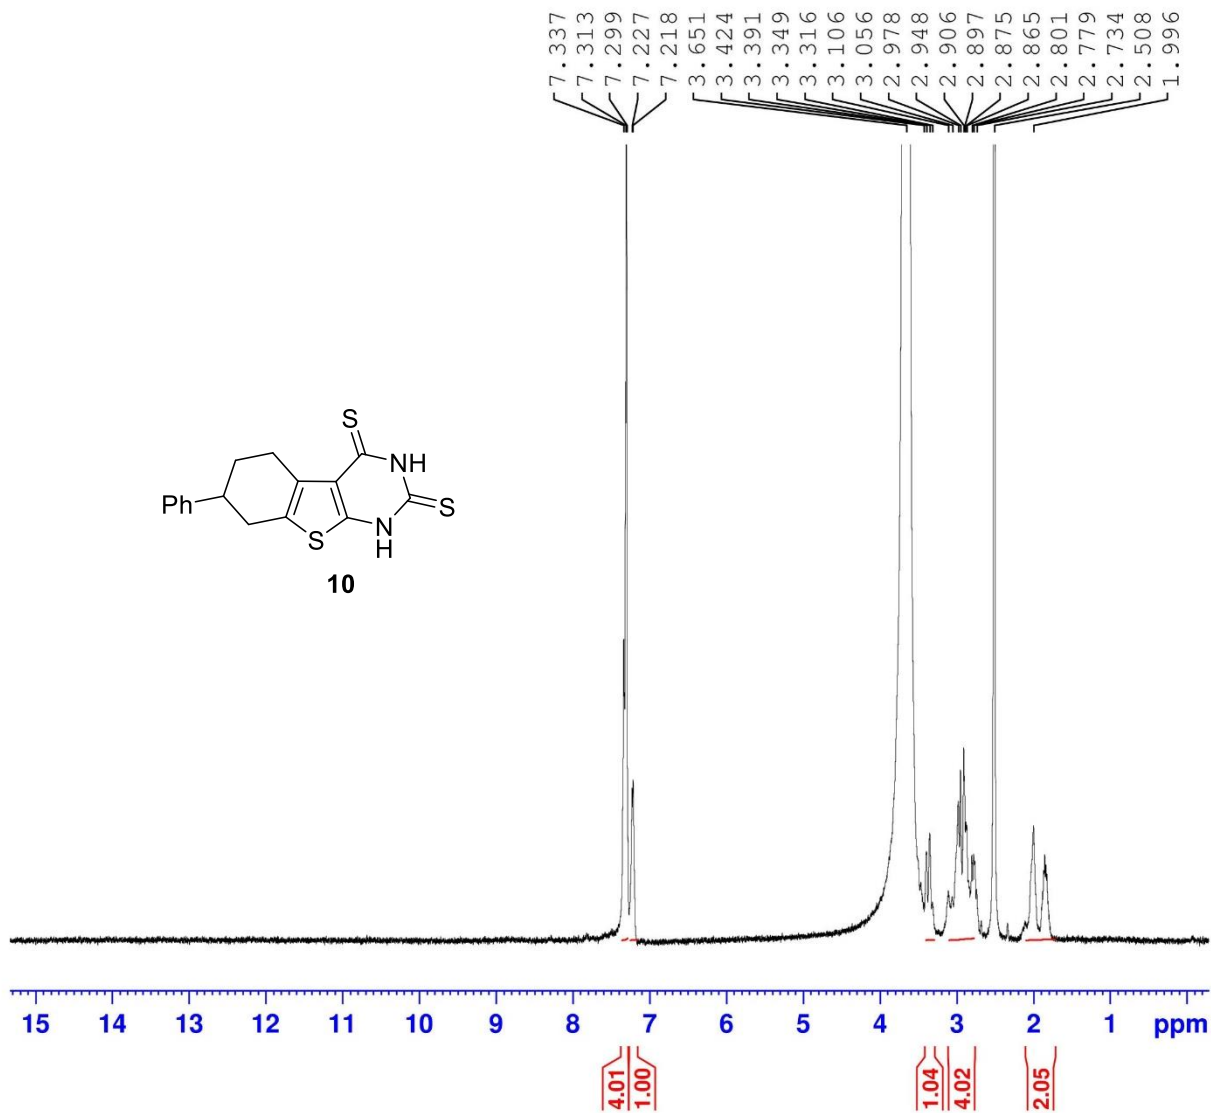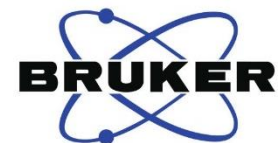

Current Data Parameters  
 NAME amna-shaabab-A14-d2o  
 EXPNO 1  
 PROCNO 1

F2 - Acquisition Parameters  
 Date\_ 20220920  
 Time 10.39  
 INSTRUM spect  
 PROBHD 5 mm PABBO BB/  
 PULPROG zg30  
 TD 65536  
 SOLVENT DMSO  
 NS 106  
 DS 2  
 SWH 8012.820 Hz  
 FIDRES 0.122266 Hz  
 AQ 4.0894465 sec  
 RG 205.37  
 DW 62.400 usec  
 DE 6.50 usec  
 TE 300.0 K  
 D1 1.00000000 sec  
 TD0 1

===== CHANNEL f1 =====  
 SFO1 400.1524711 MHz  
 NUC1 1H  
 P1 12.00 usec  
 PLW1 18.00000000 W

F2 - Processing parameters  
 SI 65536  
 SF 400.1500000 MHz  
 WDW EM  
 SSB 0  
 LB 0.30 Hz  
 GB 0  
 PC 1.00

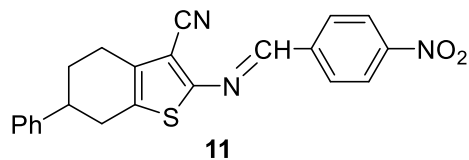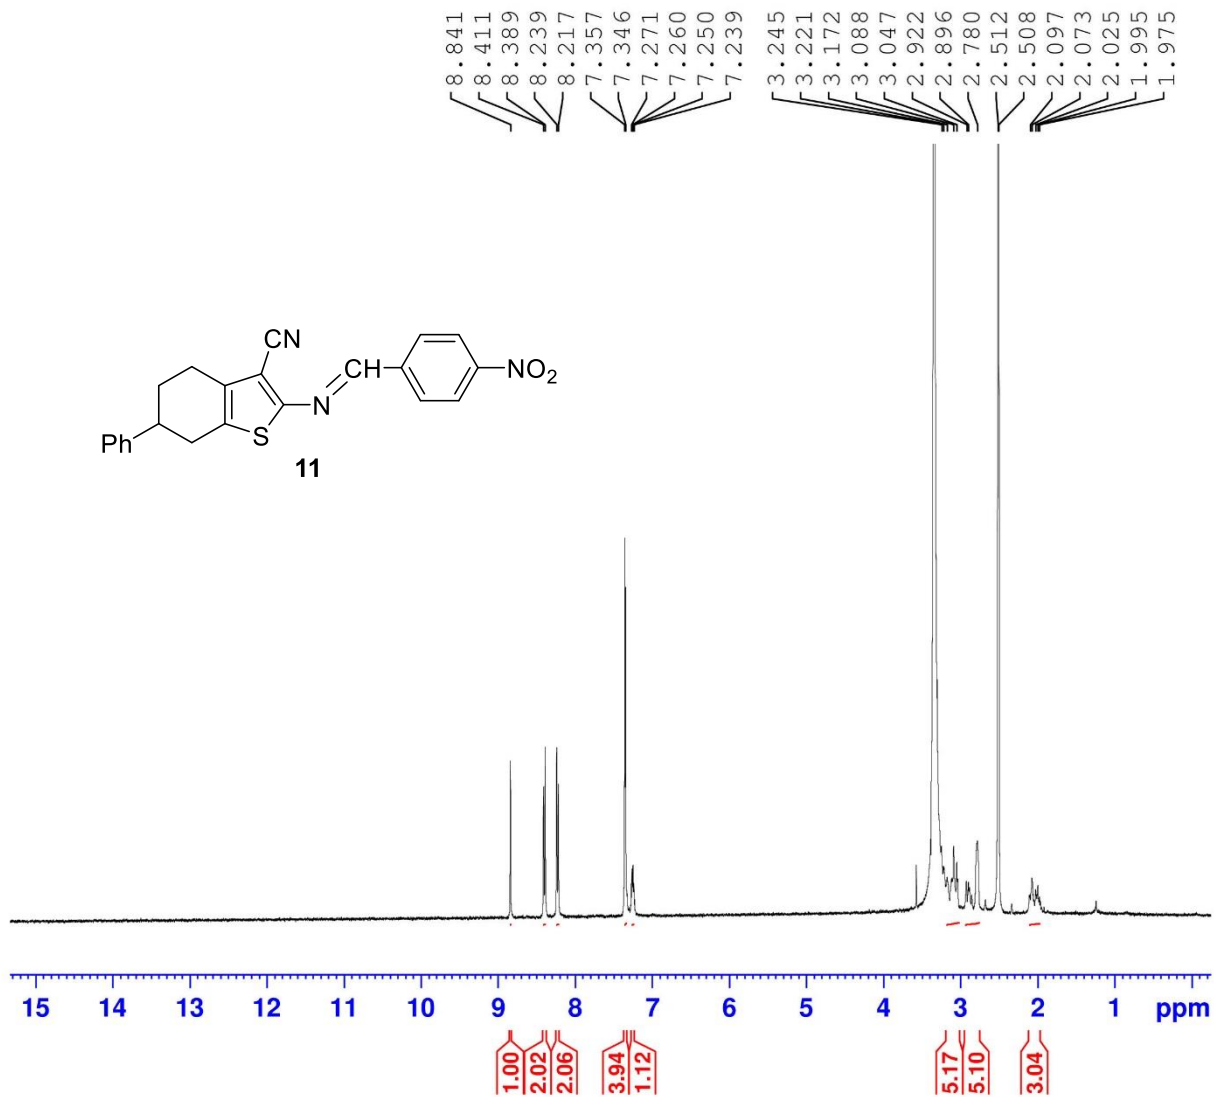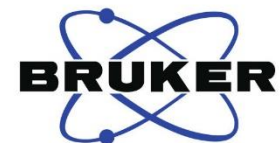

Current Data Parameters  
 NAME amna-shaaban-A4  
 EXPNO 1  
 PROCNO 1

F2 - Acquisition Parameters  
 Date\_ 20220912  
 Time 12.40  
 INSTRUM spect  
 PROBHD 5 mm PABBO BB/  
 PULPROG zg30  
 TD 65536  
 SOLVENT DMSO  
 NS 128  
 DS 2  
 SWH 8012.820 Hz  
 FIDRES 0.122266 Hz  
 AQ 4.0894465 sec  
 RG 205.37  
 DW 62.400 usec  
 DE 6.50 usec  
 TE 300.0 K  
 D1 1.00000000 sec  
 TD0 1

===== CHANNEL f1 =====  
 SF01 400.1524711 MHz  
 NUC1 1H  
 P1 12.00 usec  
 PLW1 18.00000000 W

F2 - Processing parameters  
 SI 65536  
 SF 400.1500000 MHz  
 WDW EM  
 SSB 0  
 LB 0.30 Hz  
 GB 0  
 PC 1.00

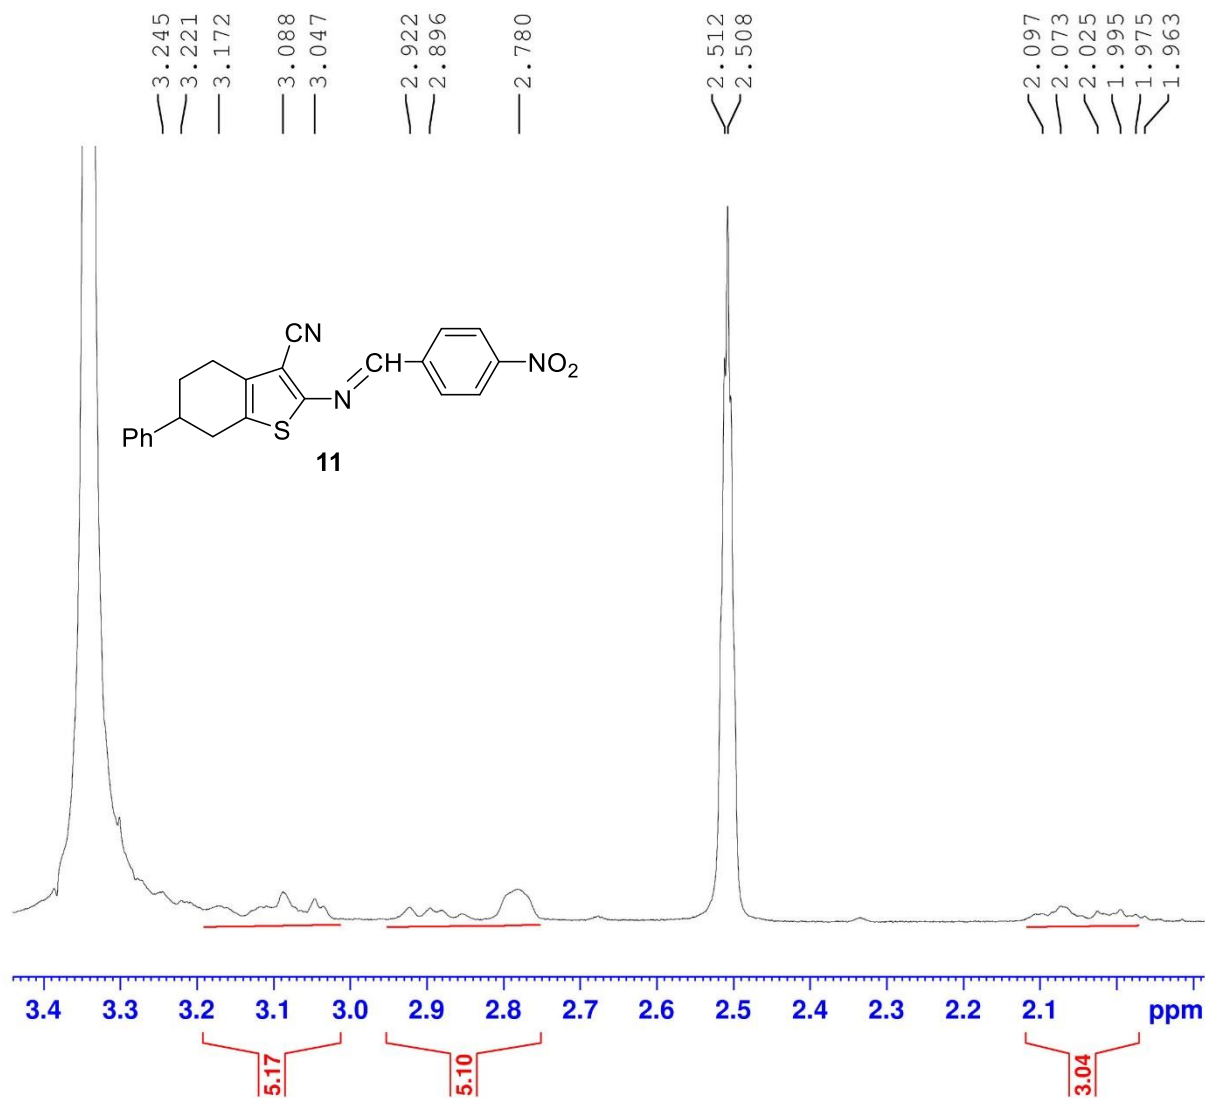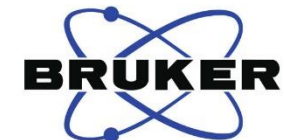

Current Data Parameters  
 NAME amna-shaaban-A4  
 EXPNO 1  
 PROCNO 1

F2 - Acquisition Parameters  
 Date\_ 20220912  
 Time 12.40  
 INSTRUM spect  
 PROBHD 5 mm PABBO BB/  
 PULPROG zg30  
 TD 65536  
 SOLVENT DMSO  
 NS 128  
 DS 2  
 SWH 8012.820 Hz  
 FIDRES 0.122266 Hz  
 AQ 4.0894465 sec  
 RG 205.37  
 DW 62.400 usec  
 DE 6.50 usec  
 TE 300.0 K  
 D1 1.00000000 sec  
 TD0 1

===== CHANNEL f1 =====  
 SFO1 400.1524711 MHz  
 NUC1 1H  
 P1 12.00 usec  
 PLW1 18.00000000 W

F2 - Processing parameters  
 SI 65536  
 SF 400.1500000 MHz  
 WDW EM  
 SSB 0  
 LB 0.30 Hz  
 GB 0  
 PC 1.00

sayed-karam-A4 #62 RT: 1.05 AV: 1 SB: 26 1.21-1.34 , 0.87-1.14 NL: 3.70E2  
T: {0,0} + c EI Full ms [40.00-1000.00]

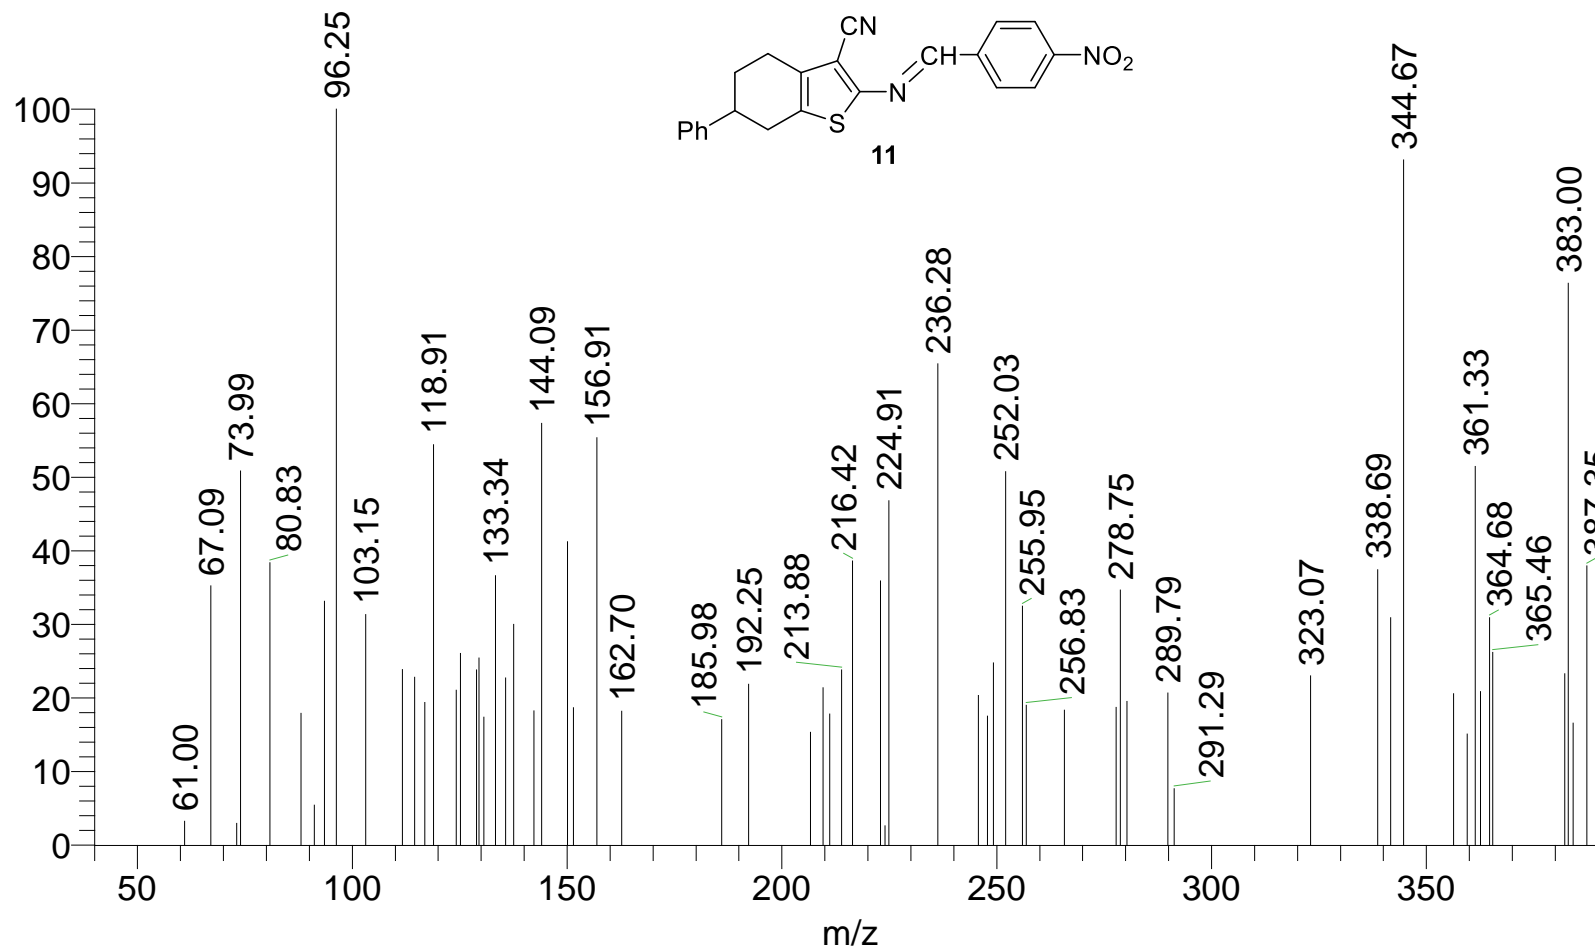



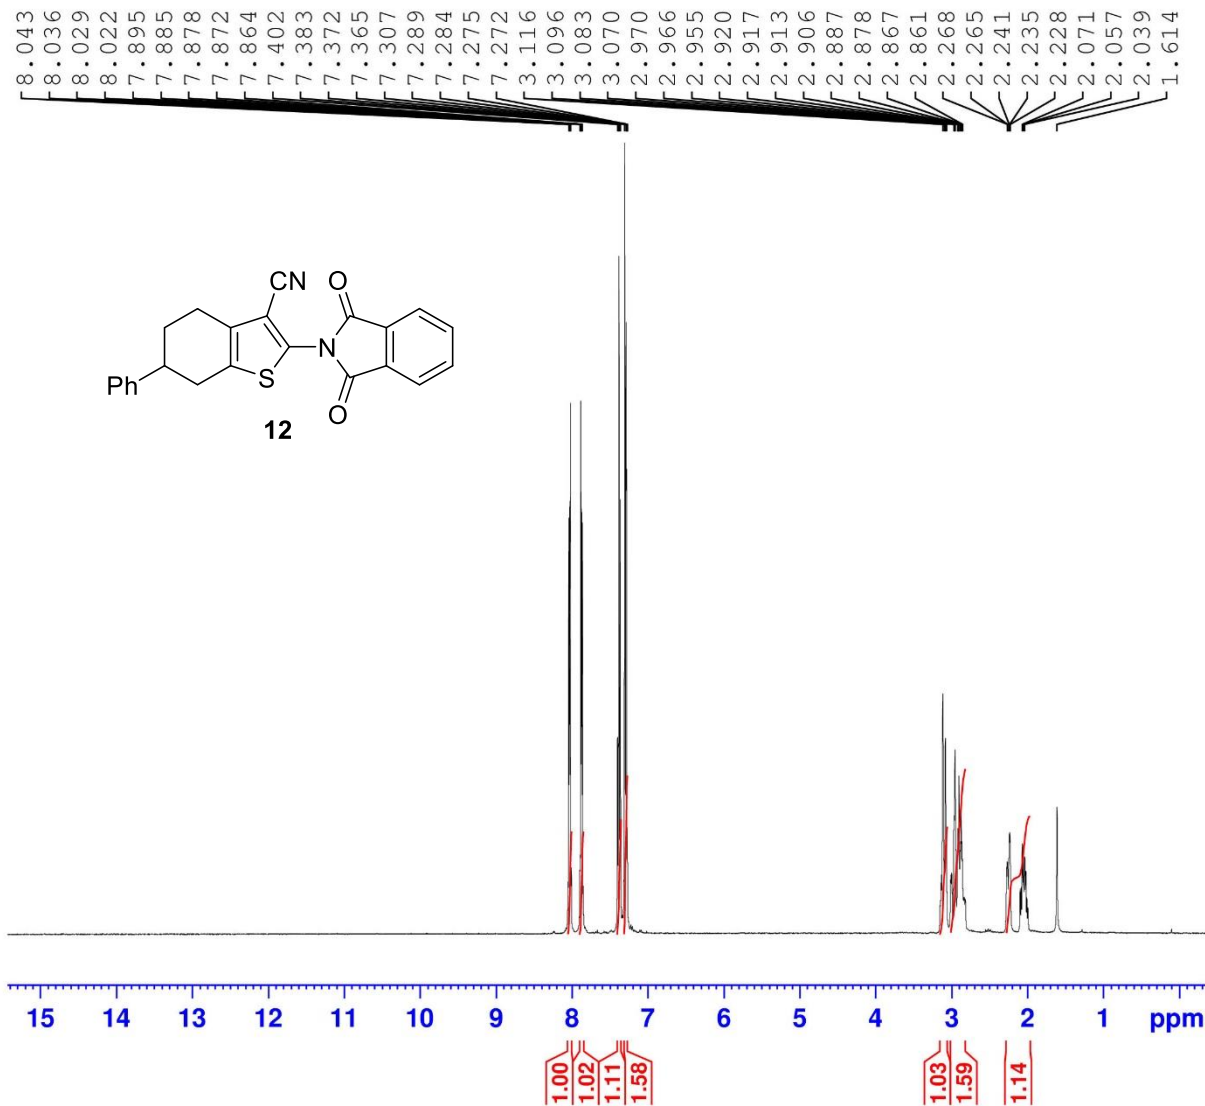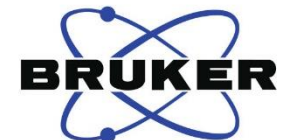

Current Data Parameters  
 NAME amna-shaaban-A21  
 EXPNO 1  
 PROCNO 1

F2 - Acquisition Parameters  
 Date\_ 20220912  
 Time 9.01  
 INSTRUM spect  
 PROBHD 5 mm PABBO BB/  
 PULPROG zg30  
 TD 65536  
 SOLVENT CDCl3  
 NS 54  
 DS 2  
 SWH 8012.820 Hz  
 FIDRES 0.122266 Hz  
 AQ 4.089465 sec  
 RG 205.37  
 DW 62.400 usec  
 DE 6.50 usec  
 TE 300.0 K  
 D1 1.0000000 sec  
 TD0 1

===== CHANNEL f1 =====  
 SFO1 400.1524711 MHz  
 NUC1 1H  
 P1 12.00 usec  
 PLW1 18.0000000 W

F2 - Processing parameters  
 SI 65536  
 SF 400.1500000 MHz  
 WDW EM  
 SSB 0  
 LB 0.30 Hz  
 GB 0  
 PC 1.00

3.142  
3.136  
3.116  
3.096  
3.083  
3.070  
3.015  
3.009  
3.001  
2.970  
2.966  
2.955  
2.920  
2.917  
2.913  
2.906  
2.887  
2.878  
2.867  
2.861  
2.845  
2.840  
2.837  
2.834  
2.822  
2.278  
2.268  
2.265  
2.262  
2.253  
2.241  
2.235  
2.228  
2.099  
2.085  
2.071  
2.057  
2.043  
2.039  
2.029  
2.024  
2.010

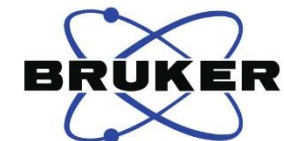

Current Data Parameters  
NAME amna-shaaban-A21  
EXPNO 1  
PROCNO 1

F2 - Acquisition Parameters  
Date\_ 20220912  
Time 9.01  
INSTRUM spect  
PROBHD 5 mm PABBO BB/  
PULPROG zg30  
TD 65536  
SOLVENT CDCl3  
NS 54  
DS 2  
SWH 8012.820 Hz  
FIDRES 0.122266 Hz  
AQ 4.0894465 sec  
RG 205.37  
DW 62.400 usec  
DE 6.50 usec  
TE 300.0 K  
D1 1.00000000 sec  
TD0 1

==== CHANNEL f1 =====  
SFO1 400.1524711 MHz  
NUC1 1H  
P1 12.00 usec  
PLW1 18.00000000 W

F2 - Processing parameters  
SI 65536  
SF 400.1500000 MHz  
WDW EM  
SSB 0  
LB 0.30 Hz  
GB 0  
PC 1.00

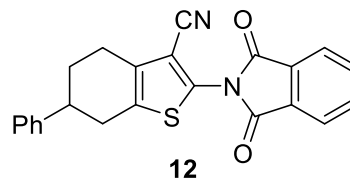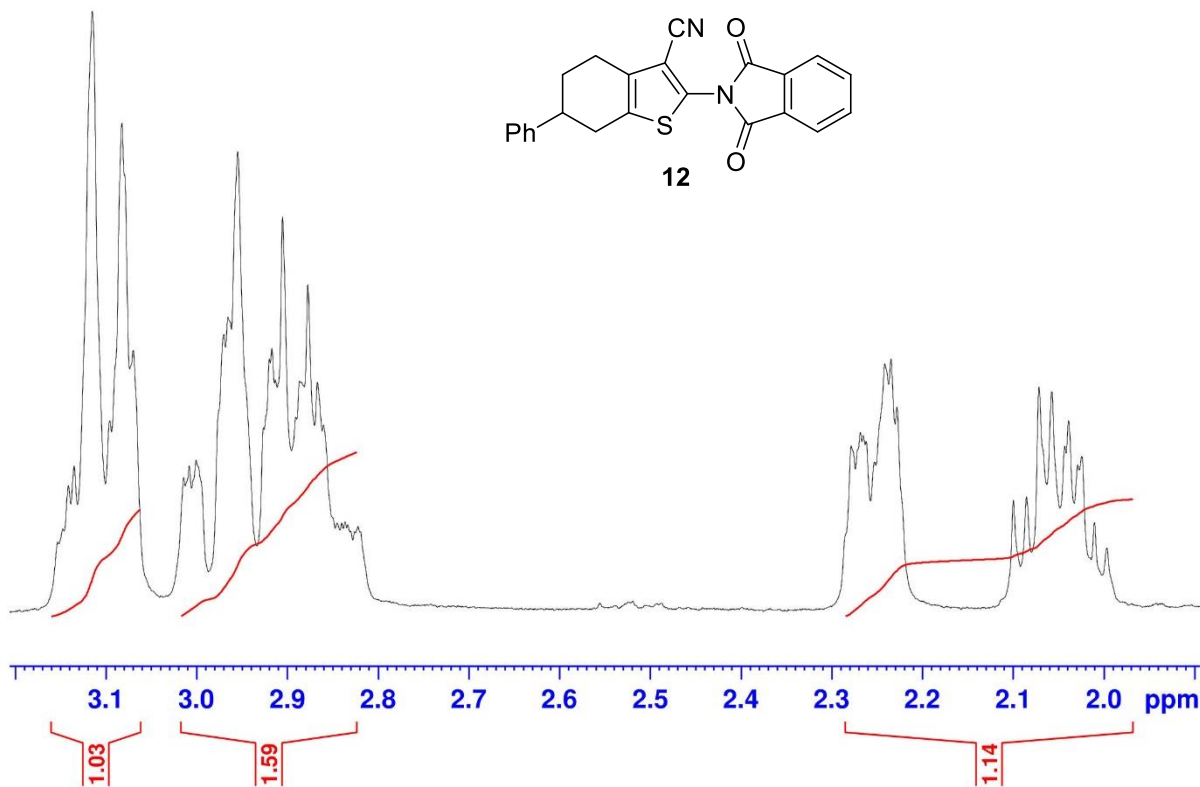

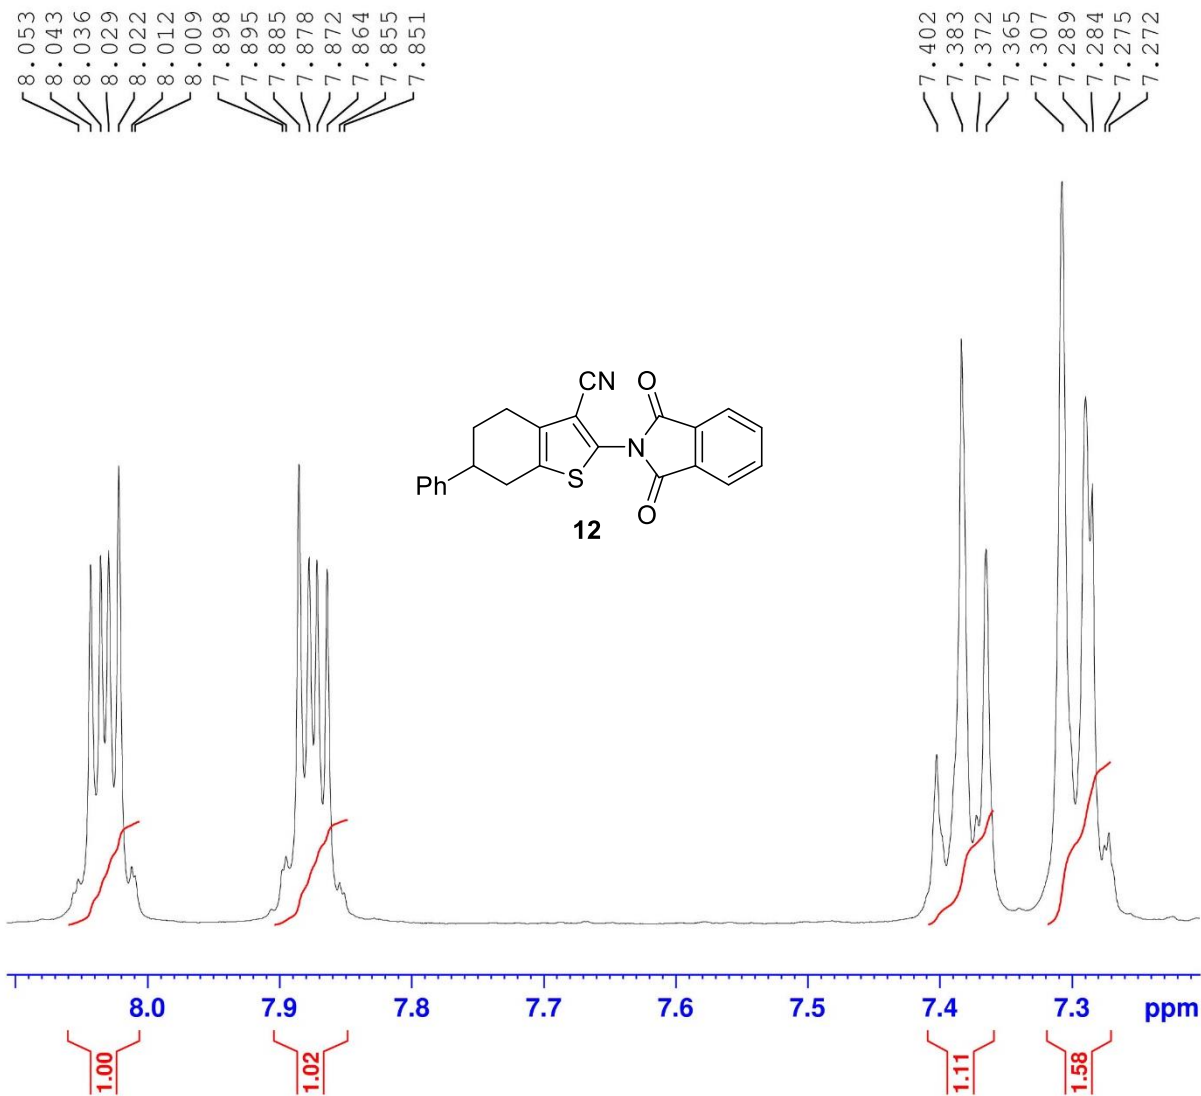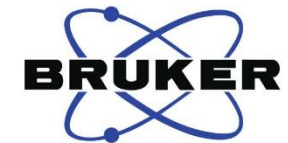

Current Data Parameters  
 NAME amna-shaaban-A21  
 EXPNO 1  
 PROCNO 1

F2 - Acquisition Parameters  
 Date\_ 20220912  
 Time 9.01  
 INSTRUM spect  
 PROBHD 5 mm PABBO BB/  
 PULPROG zg30  
 TD 65536  
 SOLVENT CDCl3  
 NS 54  
 DS 2  
 SWH 8012.820 Hz  
 FIDRES 0.122266 Hz  
 AQ 4.0894465 sec  
 RG 205.37  
 DW 62.400 usec  
 DE 6.50 usec  
 TE 300.0 K  
 D1 1.00000000 sec  
 TD0 1

===== CHANNEL f1 =====  
 SFO1 400.1524711 MHz  
 NUC1 1H  
 P1 12.00 usec  
 PLW1 18.00000000 W

F2 - Processing parameters  
 SI 65536  
 SF 400.1500000 MHz  
 WDW EM  
 SSB 0  
 LB 0.30 Hz  
 GB 0  
 PC 1.00

sayed-karam-A21 #292 RT: 4.90 AV: 1 SB: 26 1.21-1.34 , 0.87-1.14 NL: 2.70E6  
T: {0,0} + c EI Full ms [40.00-1000.00]

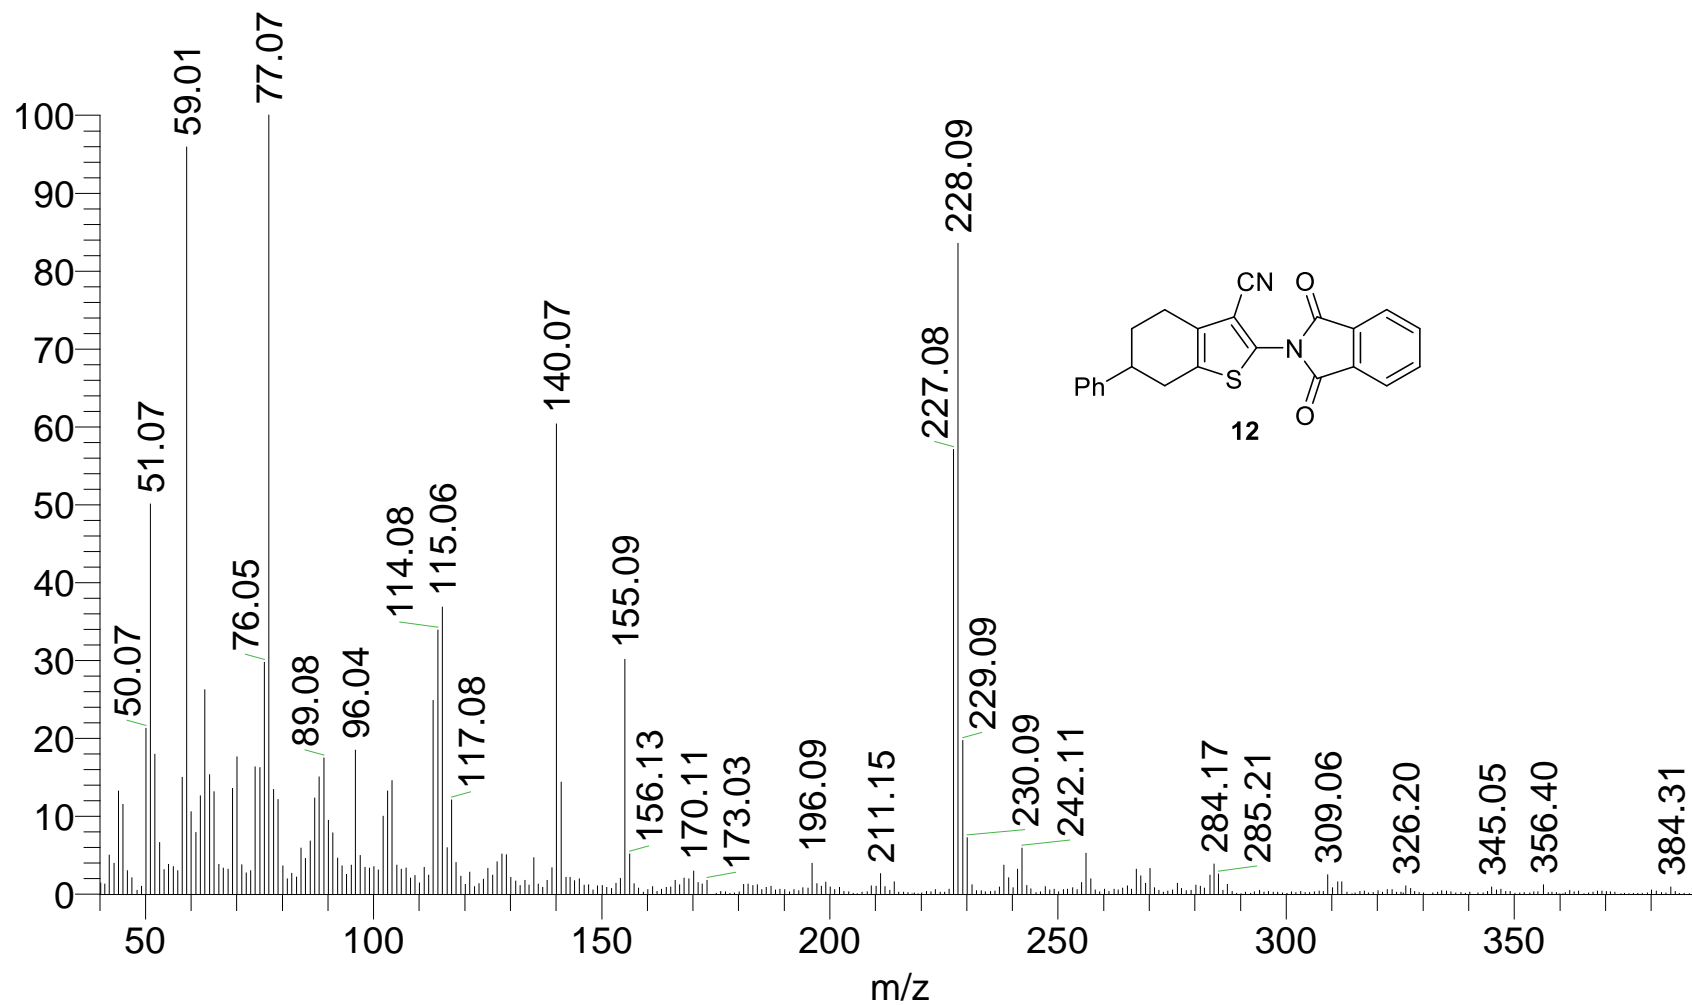

Supplement: d4ra03363a1.pdf [file d4ra03363a1.pdf]
